# Supplementary material for: Comparative effectiveness and safety of pharmacological and non-pharmacological interventions for insomnia: an overview of reviews
Source: PubMed Central journal article supplement (PMC6857325; doi:10.1186/s13643-019-1163-9), 2019-11-15
Supplement: 13643_2019_1163_MOESM2_ESM.pdf [file 13643_2019_1163_MOESM2_ESM.pdf]

## Additional File 2

|                                                                                                                                           |     |
|-------------------------------------------------------------------------------------------------------------------------------------------|-----|
| Appendix A: PRIO-harms Checklist .....                                                                                                    | 3   |
| Appendix B: Database Search Strategy and List of Grey Literature search sites .....                                                       | 8   |
| Appendix C: Review, participant, and intervention characteristics .....                                                                   | 11  |
| Appendix D: AMSTAR Results .....                                                                                                          | 28  |
| Appendix E: Detailed Tables of Results .....                                                                                              | 35  |
| Table E1. Benzodiazepines .....                                                                                                           | 35  |
| Table E2. Non-benzodiazepines .....                                                                                                       | 36  |
| Table E3. Suvorexant .....                                                                                                                | 40  |
| Table E4. Antidepressants .....                                                                                                           | 43  |
| Table E5. Anti-psychotics .....                                                                                                           | 50  |
| Table E6. Melatonin .....                                                                                                                 | 52  |
| Table E7. Diphenhydramine .....                                                                                                           | 56  |
| Table E8. Cognitive Behavioural Interventions .....                                                                                       | 58  |
| Table E9. Behavioural Interventions .....                                                                                                 | 92  |
| Table E10. Mindfulness .....                                                                                                              | 96  |
| Table E11. Combination Therapy .....                                                                                                      | 98  |
| Appendix F: Tables of primary studies by treatment comparison for outcomes with more than one included SR or SR+MA .....                  | 99  |
| Table F1. Primary studies across included systematic reviews that examined Benzodiazepines .....                                          | 99  |
| Table F2. Primary studies across included systematic reviews that examined non-benzodiazepines .....                                      | 101 |
| Table F3. Primary studies across included systematic reviews that examined Suvorexant .....                                               | 104 |
| Table F4. Primary studies across included systematic reviews that examined antidepressants .....                                          | 104 |
| Table F5. Primary studies across included systematic reviews that examined anti-psychotics .....                                          | 106 |
| Table F6. Primary studies across included systematic reviews that examined melatonin .....                                                | 107 |
| Table F7. Primary studies across included systematic reviews that compared diphenhydramine to inactive controls .....                     | 109 |
| Table F8. Primary studies across included systematic reviews that compared cognitive behavioural interventions to inactive controls ..... | 110 |

|                                                                                                                           |     |
|---------------------------------------------------------------------------------------------------------------------------|-----|
| Table F9. Primary studies across systematic reviews that compared behavioural interventions to inactive controls .....    | 131 |
| Table F10. Primary studies across included systematic reviews that examined mindfulness based interventions .....         | 133 |
| Table F11. Primary studies across included systematic reviews that compared combination therapy to inactive controls..... | 133 |

## Appendix A: PRIO-harms Checklist

| Section/Topic                         | (Sub-) item #   | Checklist item                                                                                                                                                                                            | Reported on page # |
|---------------------------------------|-----------------|-----------------------------------------------------------------------------------------------------------------------------------------------------------------------------------------------------------|--------------------|
| <b>TITLE</b>                          |                 |                                                                                                                                                                                                           |                    |
| 1. Title                              | 1a              | Specify the study design with terms such as “overview of (systematic) reviews,” “umbrella review,” “(systematic) review of systematic reviews,” or “(systematic) meta-review” in the title of the OoSRs.  | 1                  |
|                                       | 1b              | Mention “safety” or harms related terms, or the adverse event(s) of interest in the title of the OoSRs.                                                                                                   | 1                  |
| <b>ABSTRACT</b>                       |                 |                                                                                                                                                                                                           |                    |
| 2. Structured-like summary            | 2a              | Provide a structured-like abstract, as applicable: background, objective, data sources, selection criteria, data extraction, review appraisal, data synthesis methods, results, limitations, conclusions. | 3-4                |
|                                       | 2b              | Report the main findings of analysis of harms undertaken in the OoSRs or/and in the included SRs.                                                                                                         | 3-4                |
| <b>INTRODUCTION</b>                   |                 |                                                                                                                                                                                                           |                    |
| 3. Rationale                          | 3a              | Specify the rationale and the scope (wide or narrow agendas) for the overview in the context of an existing body of knowledge on the topic.                                                               | 5-6                |
|                                       | 3b              | Provide a balanced presentation of potential benefits and harms of the intervention(s).                                                                                                                   | 5-6                |
|                                       | 3c <sup>a</sup> | Define which events are considered harms according to previous literature and provide a clear rationale for the specific harms included in the OoSRs.                                                     | N/A                |
| 4. Objectives (PICOS)                 | 4               | Provide an explicit statement of research question(s) that specifies PICOS:                                                                                                                               | 6                  |
|                                       |                 | Participants <input type="checkbox"/> Interventions <input type="checkbox"/> Comparators <input type="checkbox"/> Outcomes <input type="checkbox"/> Study design <input type="checkbox"/>                 |                    |
| <b>METHODS</b>                        |                 |                                                                                                                                                                                                           |                    |
| 5. Protocol and registration          | 5a              | Indicate clearly if a protocol exists or not.                                                                                                                                                             | 6                  |
|                                       | 5b              | If registered, provide the name of the registry (such as a valid Web address, PROSPERO).                                                                                                                  | 6                  |
| 6. Eligibility criteria & outcomes of | 6a              | Specify inclusion and exclusion criteria for study design, participants, interventions and comparators in detail.                                                                                         | 7                  |
|                                       | 6b              | List (and define whenever it is necessary) the outcomes for which data were recorded, ideally include prioritization of main and additional outcomes.                                                     | 7                  |

| Section/Topic                             | (Sub-) item #   | Checklist item                                                                                                                                                                                                                                              | Reported on page # |
|-------------------------------------------|-----------------|-------------------------------------------------------------------------------------------------------------------------------------------------------------------------------------------------------------------------------------------------------------|--------------------|
| interest                                  | 6c              | Include adverse events as (primary or secondary) outcome of interest. Define them and grade their severity (such as mild, moderate, severe, fatal; severity could also be described in the appendix), if appropriate.                                       | 7-8                |
|                                           | 6d <sup>b</sup> | Specify report characteristics (such as language restrictions, publication status, and years considered) used as criteria for eligibility for the OoSRs (see also item 7).                                                                                  | 8                  |
| 7. Information sources                    | 7a              | Search at least two electronic bases.                                                                                                                                                                                                                       | 8                  |
|                                           | 7b              | Search supplementary sources (e.g. hand-searching, reference lists, related reviews and guidelines, protocol registries, conference abstracts, and other gray literature).                                                                                  | 8                  |
|                                           | 7c              | Report the date last searched and/or dates of coverage for each database.                                                                                                                                                                                   | 8                  |
| 8. Search strategy <sup>c</sup>           | 8a              | Specify full electronic search strategy (algorithm) for at least one database including any limits used (e.g. language and date restrictions-see also subitems 6d and 7c) such that it could be repeated.                                                   | Appendix B         |
|                                           | 8b              | Present any additional search process (e.g. algorithm or filter for adverse events, searches in pertinent websites) specifically to identify adverse events that have been investigated.                                                                    | Appendix B         |
| 9. Data management & selection process    | 9a <sup>d</sup> | Describe the software that was used to manage records and data throughout the OoSRs.                                                                                                                                                                        | 9                  |
|                                           | 9b              | Define what is a SR and provide the process for selecting SRs and its relevant details (screening the title and abstract or full text by at least two reviewers, selection by multiple independent investigators and resolving disagreements by consensus). | 9                  |
|                                           | 9c              | Report any attempt to handle overlapping (include one review among multiple potential candidates by choosing for example the most updated SR, the most methodologically rigorous SR or the SR with larger number of primary studies).                       | 9                  |
| 10. Additional search for primary studies | 10              | Report additional search to identify eligible primary studies (e.g. searching in more databases or update the search) and its relevant details.                                                                                                             | N/A                |
| 11. Data collection process               | 11a             | Describe the method of data extraction from included SRs (e.g. data collection form, extraction in duplicate and independently, resolving disagreements by consensus).                                                                                      | 9                  |
|                                           | 11b             | Report any processes for obtaining, confirming or updating data from investigators (e.g. contact with authors of included reviews, obtain data from primary studies of included reviews).                                                                   | N/A                |

| Section/Topic                                                  | (Sub-) item #    | Checklist item                                                                                                                                                                                                                                                                                                                         | Reported on page #           |
|----------------------------------------------------------------|------------------|----------------------------------------------------------------------------------------------------------------------------------------------------------------------------------------------------------------------------------------------------------------------------------------------------------------------------------------|------------------------------|
| 12. Data items                                                 | 12               | List (and define whenever is necessary) the specific variables for which data were recorded (e.g. PICOS items, number of included studies and participants, dose, length of follow up, results, funding sources) and any data assumptions and simplifications made.                                                                    | 9                            |
| 13. Assessment of methodological quality & quality of evidence | 13a              | State the evaluation of reporting or/and methodological quality (eg. using PRISMA or PRISMA-harms, AMSTAR or R-AMSTAR) of the included reviews.                                                                                                                                                                                        | 10                           |
|                                                                | 13b <sup>e</sup> | State the evaluation of quality for individual studies that were included in the SRs (inform whether tools such as Jadad or RoB of Cochrane were used by the included reviews) and for the additional primary studies.                                                                                                                 | N/A                          |
|                                                                | 13c              | State the evaluation of quality of evidence (e.g. using GRADE approach).                                                                                                                                                                                                                                                               | N/A                          |
|                                                                | 13d              | Describe the methods (e.g. piloted forms, independently, in duplicate) used for the quality assessment.                                                                                                                                                                                                                                | 10                           |
| 14. Meta-bias(es)                                              | 14               | Specify any planned assessment of meta-bias(es) (such as publication bias or selective reporting across studies, ROBIS tool).                                                                                                                                                                                                          | N/A                          |
| 15. Data synthesis                                             | 15a              | Specify clearly the method (narrative, meta-analysis or network meta-analysis) of handling or synthesizing data and their details (e.g. state the principal summary measures that were extracted or calculated, how heterogeneity was assessed, what statistical approaches were used if a quantitative synthesis has been conducted). | 10                           |
|                                                                | 15b              | Describe the software that was used to analyze the data if a quantitative synthesis has been conducted.                                                                                                                                                                                                                                | N/A                          |
|                                                                | 15c              | Report if zero events are included in the studies and how they were handled in statistical analyses, if relevant.                                                                                                                                                                                                                      | N/A                          |
|                                                                | 15d              | Describe methods of any pre-specified additional analyses (such as sensitivity or subgroup analyses, meta-regression).                                                                                                                                                                                                                 | N/A                          |
| <b>RESULTS</b>                                                 |                  |                                                                                                                                                                                                                                                                                                                                        |                              |
| 16. Review & primary study selection                           | 16a              | Provide the details of review selection (e.g. numbers of reviews screened, retrieved, and included and excluded in the overview) and the number of the additional eligible primary studies that were included, ideally with a flow diagram of the overview process.                                                                    | 10                           |
|                                                                | 16b              | Present a flow diagram that gives separately the number of studies focused on harms outcomes.                                                                                                                                                                                                                                          | Figure 1                     |
|                                                                | 16c <sup>e</sup> | List the studies (full citation) that were excluded after reading the full text and provide reasons.                                                                                                                                                                                                                                   | N/A                          |
| 17. Review & primary study characteristics                     | 17a <sup>e</sup> | Describe characteristics of each included SR in tables (such as title or author, search date, PICOS, design and number of studies included, number and age range of participants, dose/frequency, follow up period [treatment duration], review limitations, results or conclusion) and of each additional primary study.              | 10-11, Table 1-2, Appendix C |
|                                                                | 17b              | For each included SR report language and publication status restrictions that have been used.                                                                                                                                                                                                                                          | N/A                          |

| Section/Topic                                                          | (Sub-) item # | Checklist item                                                                                                                                                                                                                                                                         | Reported on page #         |
|------------------------------------------------------------------------|---------------|----------------------------------------------------------------------------------------------------------------------------------------------------------------------------------------------------------------------------------------------------------------------------------------|----------------------------|
| 18. Overlapping                                                        | 18            | Present or/and discuss about overlapping of studies within SRs (at least one of the following):                                                                                                                                                                                        | 12-17                      |
|                                                                        |               | <ul style="list-style-type: none"> <li>• Present measures of overlap (such as CCA).</li> </ul>                                                                                                                                                                                         | N/A                        |
|                                                                        |               | <ul style="list-style-type: none"> <li>• Provide citation matrix.<sup>c</sup></li> </ul>                                                                                                                                                                                               | Appendix F                 |
|                                                                        |               | <ul style="list-style-type: none"> <li>• Give the number of index publications or/and discuss about overlapping.<sup>f</sup></li> </ul>                                                                                                                                                | 12-17                      |
| 19. Present assessment of methodological quality & quality of evidence | 19            | Present results in text or/and tables <sup>c</sup> of any quality assessment (see also subitems 13a-c):                                                                                                                                                                                | 12, Figure 2, Appendix D   |
|                                                                        |               | <ul style="list-style-type: none"> <li>• Reporting or/and methodological quality of the included SRs.</li> </ul>                                                                                                                                                                       | 12, Figure 2, Appendix D   |
|                                                                        |               | <ul style="list-style-type: none"> <li>• Inform for the quality of the individual studies that were included in the SRs (report results for sequence generation, allocation concealment, blinding, withdrawals, bias etc.) and for the additional included primary studies.</li> </ul> | N/A                        |
|                                                                        |               | <ul style="list-style-type: none"> <li>• Quality of evidence.</li> </ul>                                                                                                                                                                                                               | N/A                        |
| 20. Present meta-bias(es)                                              | 20            | Present results of any assessment of meta-bias(es) (such as publication bias or selective reporting across studies, ROBIS assessment).                                                                                                                                                 | N/A                        |
| 21. Synthesis of results                                               | 21a           | Summarize and present the main findings of the overview for benefits and harms. If a quantitative synthesis has been conducted, present each summary measure with a confidence interval, prediction interval or a credible interval and measures of heterogeneity or inconsistency.    | 13-17, Table 3, Appendix E |
|                                                                        | 21b           | Give results of any additional analyses (such as sensitivity, subgroup analyses, or meta-regression).                                                                                                                                                                                  | N/A                        |
|                                                                        | 21c           | Report results for adverse events separately for each intervention.                                                                                                                                                                                                                    | 13-17                      |
| <b>DISCUSSION</b>                                                      |               |                                                                                                                                                                                                                                                                                        |                            |
| 22. Summary of evidence                                                | 22            | Provide a concise summary of the main findings with the strength and shortcomings of evidence for each main outcome.                                                                                                                                                                   | 18-19                      |
| 23. Limitations                                                        | 23a           | Discuss limitations of either the overview or included studies (or both) (e.g. different eligibility criteria, limitations of searching reviews, language restrictions, publication and selection bias).                                                                               | 19-20                      |

| <b>Section/Topic</b>         | <b>(Sub-) item #</b> | <b>Checklist item</b>                                                                                                                                                                                                      | <b>Reported on page #</b> |
|------------------------------|----------------------|----------------------------------------------------------------------------------------------------------------------------------------------------------------------------------------------------------------------------|---------------------------|
|                              | 23b                  | Report possible limitations of the included reviews related to harms (issues of missing data and information, definitions of harms, rare adverse effects).                                                                 | 18-19                     |
| 24. Conclusions              | 24a                  | Provide a general interpretation of the results in coherence with the review findings and present implications for practice; consider the harms equally as carefully as the benefits and in the context of other evidence. | 20                        |
|                              | 24b                  | Present implications for future research.                                                                                                                                                                                  | 18-20                     |
| <b>AUTHORSHIP</b>            |                      |                                                                                                                                                                                                                            |                           |
| 25. Contributions of authors | 25                   | Provide contributions of authors.                                                                                                                                                                                          | 26                        |
| 26. Dual (co-)authorship     | 26                   | Report about dual (co-)authorship in the limitation or declarations of interest section.                                                                                                                                   | N/A                       |
| <b>FUNDING</b>               |                      |                                                                                                                                                                                                                            |                           |
| 27. Funding or other support | 27a                  | Indicate sources of financial and other support for the OoSRs (direct funding) or for the authors (indirect funding), or report no funding.                                                                                | 26                        |
|                              | 27b                  | Provide name for the overview funder and/or sponsor, or for the authors' supporters.                                                                                                                                       | 6, 26                     |
|                              | 27c                  | Describe roles of funder(s), sponsor(s), and/or institution(s), if any, in conducted the OoSRs.                                                                                                                            | 6, 26                     |

## Appendix B: Database Search Strategy and List of Grey Literature search sites

### *Multi-database search Strategy*

---

1. exp "Sleep Initiation and Maintenance Disorders"/
2. (insomni\* or hyposomni\*).tw,kw.
3. (sleep\* adj3 initiat\* adj3 (disorder\* or dysfunction\* or problem\*)).tw,kw.
4. (sleep\* adj3 (mainten\* or maintain\*) adj3 (disorder\* or dysfunction\* or problem\*)).tw,kw.
5. ((difficult\* or disturb\* or inabilit\* or unable\* or problem\* or reduced) adj3 (asleep or sleep\*)).tw,kw.
6. sleepless\*.tw,kw.
7. (early adj1 (awake\* or wake or wakes or waking)).tw,kw.
8. or/1-7 [INSOMNIA]
9. exp Child/ not (exp Adult/ and exp Child/)
10. exp Infant/ not (exp Adult/ and exp Infant/)
11. 8 not (9 or 10) [CHILD-ONLY REMOVED]
12. exp Animals/ not (exp Animals/ and Humans/)
13. 11 not 12 [ANIMAL-ONLY REMOVED]
14. (comment or editorial or interview or news).pt.
15. (letter not (letter and randomized controlled trial)).pt.
16. 13 not (14 or 15) [OPINION PIECES REMOVED]
17. limit 16 to systematic reviews
18. meta analysis.pt.
19. exp meta-analysis as topic/
20. (meta-analy\* or metanaly\* or metaanaly\* or met analy\* or integrative research or integrative review\* or integrative review\* or research integration or research review\* or collaborative review\*).tw,kw.
21. (systematic review\* or systematic review\* or evidence-based review\* or evidence-based review\* or (evidence adj3 (review\* or review\*)) or meta-review\* or meta-review\* or meta-synthes\* or "review of reviews" or technology assessment\* or HTA or HTAs).tw,kw.
22. exp Technology assessment, biomedical/
23. (cochrane or health technology assessment or evidence report).jw.
24. (network adj (MA or MAs)).tw,kw.
25. (NMA or NMAs).tw,kw.
26. indirect comparison?.tw,kw.
27. (indirect treatment\* adj1 comparison?).tw,kw.
28. (mixed treatment\* adj1 comparison?).tw,kw.
29. (multiple treatment\* adj1 comparison?).tw,kw.
30. (multi-treatment\* adj1 comparison?).tw,kw.
31. simultaneous comparison?.tw,kw.
32. mixed comparison?.tw,kw.
33. or/18-32
34. 16 and 33
35. 17 or 34 [SYSTEMATIC REVIEWS]



36. 35 use ppez [MEDLINE RECORDS]
37. exp insomnia/
38. (insomni\* or hyposomni\*).tw,kw.
39. (sleep\* adj3 initiat\* adj3 (disorder\* or dysfunction\* or problem\*)).tw,kw.
40. (sleep\* adj3 (mainten\* or maintain\*) adj3 (disorder\* or dysfunction\* or problem\*)).tw,kw.
41. ((difficult\* or disturb\* or inabilit\* or unable\* or problem\* or reduced) adj3 (asleep or sleep\*)).tw,kw.
42. sleepless\*.tw,kw.
43. (early adj1 (awake\* or wake or wakes or waking)).tw,kw.
44. or/37-43 [INSOMNIA]
45. exp juvenile/ not (exp juvenile/ and exp adult/)
46. exp Child/ not (exp Adult/ and exp Child/)
47. exp Infant/ not (exp Adult/ and exp Infant/)
48. or/45-47
49. 44 not 48 [CHILD-ONLY REMOVED]
50. exp animal experimentation/ or exp models animal/ or exp animal experiment/ or nonhuman/ or exp vertebrate/
51. exp human/ or exp human experimentation/ or exp human experiment/
52. 50 not 51
53. 49 not 52 [ANIMAL-ONLY REMOVED]
54. editorial.pt.
55. letter.pt. not (letter.pt. and randomized controlled trial/)
56. 53 not (54 or 55) [OPINION PIECES REMOVED]
57. meta-analysis/
58. "systematic review"/
59. "meta analysis (topic)"/
60. (meta-analy\* or metanaly\* or metaanaly\* or met analy\* or integrative research or integrative review\* or integrative review\* or research integration or research review\* or collaborative review\*).tw,kw.
61. (systematic review\* or systematic review\* or evidence-based review\* or evidence-based review\* or (evidence adj3 (review\* or review\*)) or meta-review\* or meta-review\* or meta-synthes\* or "review of reviews" or technology assessment\* or HTA or HTAs).tw,kw.
62. biomedical technology assessment/
63. (cochrane or health technology assessment or evidence report).jw.
64. (network adj (MA or MAs)).tw,kw.
65. (NMA or NMAs).tw,kw.
66. indirect comparison?.tw,kw.
67. (indirect treatment\* adj1 comparison?).tw,kw.
68. (mixed treatment\* adj1 comparison?).tw,kw.
69. (multiple treatment\* adj1 comparison?).tw,kw.
70. (multi-treatment\* adj1 comparison?).tw,kw.
71. simultaneous comparison?.tw,kw.
72. mixed comparison?.tw,kw.
73. or/57-72

74. 56 and 73 [SYSTEMATIC REVIEWS]  
 75. 74 use emczd [EMBASE RECORDS]  
 76. Insomnia/  
 77. (insomni\* or hyposomni\*).tw,kw.  
 78. (sleep\* adj3 initiat\* adj3 (disorder\* or dysfunction\* or problem\*)).tw,kw.  
 79. (sleep\* adj3 (mainten\* or maintain\*) adj3 (disorder\* or dysfunction\* or problem\*)).tw,kw.  
 80. ((difficult\* or disturb\* or inabilit\* or unable\* or problem\* or reduced) adj3 (asleep or sleep\*)).tw,kw.  
 81. sleepless\*.tw,kw.  
 82. (early adj1 (awake\* or wake or wakes or waking)).tw,kw.  
 83. or/76-82 [INSOMNIA]  
 84. Meta Analysis/  
 85. (meta-analy\* or metanaly\* or metaanaly\* or met analy\* or integrative research or integrative review\* or integrative review\* or research integration or research review\* or collaborative review\*).tw,kw.  
 86. (systematic review\* or systematic review\* or evidence-based review\* or evidence-based review\* or (evidence adj3 (review\* or review\*)) or meta-review\* or meta-review\* or meta-synthes\* or "review of reviews" or technology assessment\* or HTA or HTAs).tw,kw.  
 87. (network adj (MA or MAs)).tw,kw.  
 88. (NMA or NMAs).tw,kw.  
 89. indirect comparison?.tw,kw.  
 90. (indirect treatment\* adj1 comparison?).tw,kw.  
 91. (mixed treatment\* adj1 comparison?).tw,kw.  
 92. (multiple treatment\* adj1 comparison?).tw,kw.  
 93. (multi-treatment\* adj1 comparison?).tw,kw.  
 94. simultaneous comparison?.tw,kw.  
 95. mixed comparison?.tw,kw.  
 96. or/84-95  
 97. 83 and 96 [SYSTEMATIC REVIEWS]  
 98. 97 use ppez  
 99. 97 use emczd  
 100. 97 not (98 or 99) [PSYCINFO RECORDS]  
 101. 36 or 75 or 100 [ALL DATABASES]

*List of Grey Literature search sites*

---

- Health Technology Assessment Sites
  - Canadian Agency for Drugs and Technologies in Health ([www.cadth.ca](http://www.cadth.ca))
  - Agency for Healthcare Research and Quality ([www.ahrq.gov](http://www.ahrq.gov))
  - The International Network of Agencies for Health Technology Assessment ([www.inahta.org](http://www.inahta.org))
  - National Institute for Health and Care Excellence ([www.nice.org.uk](http://www.nice.org.uk))
- International prospective register of systematic reviews (PROSPERO: <https://www.crd.york.ac.uk/prospero/>)

## Appendix C: Review, participant, and intervention characteristics

| Author, Year                                        | # and type of included studies        | Age and Sex<br>[mean (SD)]; % female                                                                     | Treatment comparison (doses [mg])                                                                   | Frequency;                         |
|-----------------------------------------------------|---------------------------------------|----------------------------------------------------------------------------------------------------------|-----------------------------------------------------------------------------------------------------|------------------------------------|
| Country                                             | Sample size                           |                                                                                                          | Delivery method and setting                                                                         | duration of treatment;             |
|                                                     | Literature search dates               | Co-morbidities                                                                                           |                                                                                                     | length of follow-up (range, weeks) |
| <i>Systematic Reviews with Meta-analysis (n=35)</i> |                                       |                                                                                                          |                                                                                                     |                                    |
| Ballesio, 2017<br>Germany                           | 47 RCTs                               |                                                                                                          | CBT-I group v control                                                                               |                                    |
|                                                     | 4,317                                 | 51.9 (NR); 62.8%                                                                                         | CBT-I individual v control                                                                          |                                    |
|                                                     | Intervention: 2,448<br>Control: 1,869 | None                                                                                                     | CBT-I self-help v control                                                                           | NR; NR; NR                         |
|                                                     | 1986-2014                             |                                                                                                          | Group behavioural therapy v control                                                                 |                                    |
| Brasure, 2015<br>USA                                | 46 RCTs                               |                                                                                                          | Control conditions: sleep hygiene, wait-list control, placebo                                       |                                    |
|                                                     | 5764                                  | NR                                                                                                       | Zolpidem (10 or 15mg) v placebo outpatient                                                          | “as needed”; NR; 4 to 34.76        |
|                                                     | 2004-2015                             | Pain, chronic low back pain, hearing impairment                                                          | Doxepin (1, 3, or 6 mg) v placebo outpatient                                                        | NR; NR; 4 to 12                    |
|                                                     |                                       |                                                                                                          | Suvorexant (15 or 20mg) v placebo                                                                   | NR; NR; 4                          |
|                                                     |                                       |                                                                                                          | CBT-I v control (placebo/sham treatment, wait-list, no treatment, or sleep hygiene/sleep education) | Once a week; ≤1 hour; 4 to 104     |
|                                                     |                                       | Individual or group (in-person), Phone, Self-help (books, handouts, or electronic resources); outpatient |                                                                                                     |                                    |

| <b>Author, Year</b>            | <b># and type of included studies</b> | <b>Age and Sex</b><br>[mean (SD)]; % female | <b>Treatment comparison (doses [mg])</b>                                                                      | <b>Frequency;</b>                                                |
|--------------------------------|---------------------------------------|---------------------------------------------|---------------------------------------------------------------------------------------------------------------|------------------------------------------------------------------|
| <b>Country</b>                 | <b>Sample size</b>                    | <b>Co-morbidities</b>                       | <b>Delivery method and setting</b>                                                                            | <b>duration of treatment; length of follow-up (range, weeks)</b> |
| <b>Literature search dates</b> |                                       |                                             |                                                                                                               |                                                                  |
|                                |                                       |                                             | Sleep restriction v control                                                                                   |                                                                  |
|                                |                                       |                                             | Relaxation therapy v control                                                                                  |                                                                  |
|                                |                                       |                                             | Behavioural intervention or brief behavioral therapy v control                                                | NR; NR; 4 to 26                                                  |
|                                |                                       |                                             | Outpatient                                                                                                    | NR; NR; 4                                                        |
|                                |                                       |                                             | Control conditions: sham treatment/placebo, wait-list control, no treatment, or sleep hygiene/sleep education | NR; NR; 4                                                        |
| Buscemi, 2004                  | 139                                   | NR                                          | Melatonin (0.1, 0.3, 0.5, 1, 2, 3, 5, or 6 mg) v placebo                                                      | Nightly; 16 days; NR                                             |
| Canada                         | NR                                    | NR                                          | Oral - sustained-release, fast-release, or immediate-release                                                  |                                                                  |
|                                | NR-2003                               |                                             |                                                                                                               |                                                                  |
| Buscemi, 2005                  | 97 RCTs                               | NR                                          | Flurazepam (15 or 30 mg) v placebo                                                                            | NR; NR; NR                                                       |
|                                |                                       |                                             | Temazepam (15, 20, or 30 mg) v placebo                                                                        |                                                                  |
|                                |                                       |                                             | Triazolam (0.125, 0.25, or 0.5 mg) v placebo                                                                  |                                                                  |
|                                |                                       |                                             | Zolpidem (5, 10, 15, or 20 mg) v placebo                                                                      | NR; NR; NR                                                       |
|                                |                                       |                                             | Zopiclone (7.5 mg) v placebo                                                                                  |                                                                  |
| Canada                         | NR                                    | NR                                          | Melatonin (0.1, 0.3, 0.5, 1, 2, 3, or 5 mg) v placebo                                                         | NR; NR; NR                                                       |
|                                |                                       |                                             | Doxepin (25 mg or 25 -50 mg) v placebo                                                                        | NR; NR; NR                                                       |
|                                |                                       |                                             | Trazodone (50 mg; 150 -250 mg) v placebo                                                                      |                                                                  |
|                                | NR-2004                               |                                             | CBT v placebo                                                                                                 | NR; NR; NR                                                       |

| <b>Author, Year</b>            | <b># and type of included studies</b> | <b>Age and Sex</b><br>[mean (SD)]; % female                | <b>Treatment comparison (doses [mg])</b>                                                                                                                                                      | <b>Frequency;</b>                                                |
|--------------------------------|---------------------------------------|------------------------------------------------------------|-----------------------------------------------------------------------------------------------------------------------------------------------------------------------------------------------|------------------------------------------------------------------|
| <b>Country</b>                 | <b>Sample size</b>                    | <b>Co-morbidities</b>                                      | <b>Delivery method and setting</b>                                                                                                                                                            | <b>duration of treatment; length of follow-up (range, weeks)</b> |
| <b>Literature search dates</b> |                                       |                                                            |                                                                                                                                                                                               |                                                                  |
|                                |                                       |                                                            | CBT + relaxation v placebo                                                                                                                                                                    |                                                                  |
|                                |                                       |                                                            | CBT + relaxation v relaxation                                                                                                                                                                 |                                                                  |
|                                |                                       |                                                            | CBT + relaxation v CBT                                                                                                                                                                        |                                                                  |
|                                |                                       |                                                            | Relaxation v placebo                                                                                                                                                                          |                                                                  |
|                                |                                       |                                                            | Triazolam (0.25 mg) or Temazepam (7.5 -30mg) + CBT v placebo                                                                                                                                  |                                                                  |
|                                |                                       |                                                            | CBT components: cognitive control, stimulus control, cognitive distraction, cognitive therapy, sleep restriction/compression, sleep hygiene, paradoxical intention                            |                                                                  |
|                                |                                       |                                                            | Relaxation components: relaxation training, group relaxation, progressive muscle relaxation, Autogenic training, breathing process training, EMG biofeedback, hypnotic relaxation             |                                                                  |
| Cheng, 2012                    | 6 RCTs                                | NR                                                         | CBT-I (sleep hygiene, stimulus control, relaxation training, sleep restriction, cognitive restructuring, relapse prevention, psychoeducation) v control (wait-list control, sleep-monitoring) | NR; 5 to 9; 3 to 26                                              |
| Hong Kong                      | 431                                   | Cancer-related insomnia                                    | Computer or mobile phone; Home-based                                                                                                                                                          |                                                                  |
|                                | 1990-2011                             |                                                            |                                                                                                                                                                                               |                                                                  |
| Ferracioli-Oda, 2013           | 19 RCTs                               | NR                                                         | Melatonin (0.1, 0.3, 0.5, 1, 2, 3, or 5 mg) v placebo                                                                                                                                         | NR; NR; 1 to 26                                                  |
| USA                            | 1683                                  | Delayed sleep phase disorder, REM sleep behaviour disorder |                                                                                                                                                                                               |                                                                  |
|                                | NR                                    |                                                            |                                                                                                                                                                                               |                                                                  |

| <b>Author, Year</b> | <b># and type of included studies</b>  | <b>Age and Sex</b><br>[mean (SD)]; % female | <b>Treatment comparison (doses [mg])</b>                                                                                                                                                 | <b>Frequency;</b>                                                |
|---------------------|----------------------------------------|---------------------------------------------|------------------------------------------------------------------------------------------------------------------------------------------------------------------------------------------|------------------------------------------------------------------|
| <b>Country</b>      | <b>Sample size</b>                     | <b>Co-morbidities</b>                       | <b>Delivery method and setting</b>                                                                                                                                                       | <b>duration of treatment; length of follow-up (range, weeks)</b> |
|                     | <b>Literature search dates</b>         |                                             |                                                                                                                                                                                          |                                                                  |
| Gong, 2016          | 6 RCTs                                 | NR                                          | Mindfulness based stress reduction, mindfulness meditation, or mindfulness based therapy for insomnia v control (wait-list control, sleep hygiene education, self-monitoring)            | NR; NR; 6 -8                                                     |
| China               | 330                                    | Depression, cancer                          |                                                                                                                                                                                          |                                                                  |
|                     | Inception-2015                         |                                             |                                                                                                                                                                                          |                                                                  |
| Ho, 2015            | 20 RCTs                                | 49.3 (NR); 74.2%                            | CBT (stimulus control, sleep restriction, sleep hygiene, relaxation, cognitive therapy) v control (wait-list control, routine care, or no treatment)                                     | NR; NR; 4 to 52                                                  |
| Hong Kong           | 2411                                   | None                                        | Self-help; home                                                                                                                                                                          |                                                                  |
|                     | Inception-2013                         |                                             |                                                                                                                                                                                          |                                                                  |
| Ho, 2016            | 11 RCTs                                | 45.3 (NR); 35.6%                            | CBT (image rehearsal therapy, exposure, rescripting and relaxation therapy, mind-body bridging, behavioural sleep intervention) v control (wait list control, sleep hygiene, or placebo) | NR; 2 -12; 1 to 26                                               |
| Hong Kong           | Intervention: 303<br>Control: 290      | PTSD, depression                            | Individual or group delivery                                                                                                                                                             |                                                                  |
|                     | Inception-2014                         |                                             |                                                                                                                                                                                          |                                                                  |
| Hwang, 2016         | 37<br>13 RCTs<br>24 Quasi-experimental | NR                                          | Behavioural therapy v control (unspecified)                                                                                                                                              | NR; NR; NR                                                       |
| South Korea         | 2150                                   | NR                                          |                                                                                                                                                                                          |                                                                  |
|                     | NR                                     |                                             |                                                                                                                                                                                          |                                                                  |
| Irwin, 2006         | 23 RCTs                                | NR                                          | CBT (relaxation/biofeedback/hypnosis, sleep compression/restriction, paradoxical intention) v control (unspecified)                                                                      | NR; NR; NR                                                       |
| United States       | NR                                     | None                                        |                                                                                                                                                                                          |                                                                  |
|                     | 1966-2004                              |                                             |                                                                                                                                                                                          |                                                                  |
| Johnson, 2016       | 8 RCTs                                 | NR                                          | CBT-I v control (wait-list control, treatment as usual, sleep                                                                                                                            | NR; NR; 13 to 52                                                 |

| <b>Author, Year</b>   | <b># and type of included studies</b>    | <b>Age and Sex</b><br>[mean (SD)]; % female                          | <b>Treatment comparison (doses [mg])</b>                                                                                                     | <b>Frequency;</b>                                                |
|-----------------------|------------------------------------------|----------------------------------------------------------------------|----------------------------------------------------------------------------------------------------------------------------------------------|------------------------------------------------------------------|
| <b>Country</b>        | <b>Sample size</b>                       | <b>Co-morbidities</b>                                                | <b>Delivery method and setting</b>                                                                                                           | <b>duration of treatment; length of follow-up (range, weeks)</b> |
|                       | <b>Literature search dates</b>           |                                                                      |                                                                                                                                              |                                                                  |
| Canada                | 752<br>Intervention: 434<br>Control: 318 | Cancer                                                               | education, behavioural placebo, mindfulness-based stress reduction)                                                                          |                                                                  |
|                       | Inception-2014                           |                                                                      | Individual, group, video or online-based                                                                                                     |                                                                  |
| Kishi, 2015           | 4 RCTs<br>3076                           | 56.6 (NR); 61.8%                                                     | Suvorexant (10 -80mg/day) v placebo                                                                                                          | NR; NR; 4 to 52                                                  |
| Japan                 | NR-2015                                  | None                                                                 | Outpatient                                                                                                                                   |                                                                  |
| Koffel, 2015          | 8 RCTs<br>NR                             | NR<br>Chronic pain, cancer, fibromyalgia, chronic illness, arthritis | CBT-I (stimulus control, sleep restriction, addressing dysfunctional beliefs about sleep) v control (wait-list, treatment as usual, placebo) | >1 session; NR; 13.04 to 52                                      |
| USA                   | NR-2013                                  |                                                                      | Group delivery; community-based                                                                                                              |                                                                  |
| Kuriyama, 2017        | 4 RCTs<br>3076                           | 56.3 (15.3); 61.5%                                                   | Suvorexant (10, 15, 20, 30, 40, or 80mg/d) v placebo                                                                                         | NR; NR; 4 to 52                                                  |
| Japan                 | NR-2016                                  | None                                                                 |                                                                                                                                              |                                                                  |
| Lee, NA [unpublished] | 18 RCTs<br>NR                            | NR                                                                   | Melatonin (0.1, 0.3, 1, 2, 5, 12, or 75 mg; 0.05, 0.1, or 0.15 mg/kg) v placebo                                                              | NR; 4 days to 26 weeks; NR                                       |
| South Korea           | NR-2014                                  | None                                                                 | Transbuccal; sustained release, fast release, controlled release, or prolonged release                                                       |                                                                  |
| Liu, 2017             | 7 RCTs                                   | NR                                                                   | Doxepin (1, 3, or 6 mg) v placebo                                                                                                            | NR; NR; NR                                                       |
| China                 | Intervention: 743                        | None                                                                 |                                                                                                                                              |                                                                  |

| <b>Author, Year</b>            | <b># and type of included studies</b>    | <b>Age and Sex</b><br>[mean (SD)]; % female                        | <b>Treatment comparison (doses [mg])</b>                                                                                                                                                                     | <b>Frequency;</b>                                                |
|--------------------------------|------------------------------------------|--------------------------------------------------------------------|--------------------------------------------------------------------------------------------------------------------------------------------------------------------------------------------------------------|------------------------------------------------------------------|
| <b>Country</b>                 | <b>Sample size</b>                       | <b>Co-morbidities</b>                                              | <b>Delivery method and setting</b>                                                                                                                                                                           | <b>duration of treatment; length of follow-up (range, weeks)</b> |
| <b>Literature search dates</b> |                                          |                                                                    |                                                                                                                                                                                                              |                                                                  |
|                                | Control: 733                             |                                                                    |                                                                                                                                                                                                              |                                                                  |
|                                | NR-2016                                  |                                                                    |                                                                                                                                                                                                              |                                                                  |
| McCleery, 2016                 | 3 RCTs                                   | NR                                                                 | Melatonin (5 or 1 mg immediate-release, 2or 2.5 mg slow-release) v placebo                                                                                                                                   | Nightly (1-2 hours before bedtime); NR; 8 to 28                  |
| UK                             | 222                                      | Dementia                                                           | Tablet; long-term care and community care                                                                                                                                                                    |                                                                  |
|                                | NR-2016                                  |                                                                    |                                                                                                                                                                                                              |                                                                  |
| Montgomery, 2003               | 6 RCTs                                   | NR                                                                 | CBT (sleep hygiene, stimulus control, muscle relaxation, sleep restriction, cognitive therapy, education, imagery training) v control (wait-list control, placebo)                                           | NR; NR; 13 to 104                                                |
| USA                            | 282<br>224 in MA                         | Parasomnia, sleep apnea                                            | Group or individual delivery                                                                                                                                                                                 |                                                                  |
|                                | Inception -2002                          |                                                                    |                                                                                                                                                                                                              |                                                                  |
| Navarro-Bravo, 2015            | 9 RCTs                                   | NR                                                                 | CBT (sleep restriction, stimulus control, sleep education/hygiene) v control (placebo, wait-list control, stress management and wellness training, treatment as usual, sleep hygiene/education)              | NR; NR; 5 to 8                                                   |
| Spain                          | 699<br>Intervention: 352<br>Control: 347 | Cancer survivor, depression, restless leg syndrome, osteoarthritis |                                                                                                                                                                                                              |                                                                  |
|                                | NR-2012                                  |                                                                    |                                                                                                                                                                                                              |                                                                  |
| Okajima, 2011                  | 14 RCTs                                  | NR                                                                 | CBT (sleep hygiene education, sleep restriction, stimulus control, cognitive therapy, relaxation, paradoxical intention) v control (placebo, wait-list control, treatment as usual, sleep hygiene education) | 1 – 8 sessions; NR; 4 to 104                                     |
| Japan                          | Intervention: 454<br>Control: 384        | None                                                               |                                                                                                                                                                                                              |                                                                  |
|                                | 1990-2009                                |                                                                    | Individual or group delivery                                                                                                                                                                                 |                                                                  |
| Sateia, 2017                   | 129 RCTs                                 | NR                                                                 | Temazepam (15 mg) v placebo                                                                                                                                                                                  | NR; 5 days to 8 weeks; NR                                        |
|                                | 46 in MA                                 |                                                                    | Zolpidem (10 mg) v placebo                                                                                                                                                                                   | NR; 2 to 32; NR                                                  |
| USA                            |                                          | None                                                               | Melatonin (2mg) v placebo                                                                                                                                                                                    | Nightly; 3; NR                                                   |



| <b>Author, Year</b> | <b># and type of included studies</b> | <b>Age and Sex</b><br>[mean (SD)]; % female | <b>Treatment comparison (doses [mg])</b>                                                                                                                                                                   | <b>Frequency;</b>                                                |
|---------------------|---------------------------------------|---------------------------------------------|------------------------------------------------------------------------------------------------------------------------------------------------------------------------------------------------------------|------------------------------------------------------------------|
| <b>Country</b>      | <b>Sample size</b>                    | <b>Co-morbidities</b>                       | <b>Delivery method and setting</b>                                                                                                                                                                         | <b>duration of treatment; length of follow-up (range, weeks)</b> |
|                     | <b>Literature search dates</b>        |                                             |                                                                                                                                                                                                            |                                                                  |
|                     | NR                                    |                                             | Doxepin (3 mg) v placebo                                                                                                                                                                                   | NR; 2 nights to 12 weeks; NR                                     |
|                     | NR-2016                               |                                             | Doxepin (6 mg) v placebo                                                                                                                                                                                   | NR; 2 nights to 5 weeks; NR                                      |
|                     |                                       |                                             | Diphenhydramine (50 mg) v placebo                                                                                                                                                                          | Nightly; 2; NR                                                   |
| Seda, 2015          | 8 RCTs<br>NR                          | NR                                          | Imagery rehearsal therapy v CBT (stimulus control, sleep restriction therapy) + Imagery rehearsal therapy                                                                                                  | 1 to 8 sessions; NR; NR                                          |
| USA                 | NR                                    | PTSD, nightmares                            | Face-to-face, group, self-help; outpatient                                                                                                                                                                 |                                                                  |
| Seyffert, 2016      | 15 RCTs<br>2392                       | NR                                          | CBT (sleep education, stimulus control, sleep restriction, relaxation, sleep hygiene, cognitive techniques) v control (wait-list control, internet control, treatment as usual)                            | Weekly; NR; 4 to 48                                              |
| USA                 | NR-2015                               | Major depression                            | Internet or at home delivery                                                                                                                                                                               |                                                                  |
| Soldatos, 1999      | 75 (designs NR)                       | NR                                          | Triazolam (0.25 or 0.5 mg) v placebo                                                                                                                                                                       | NR; 1 to 42 nights; NR                                           |
| Greece              | 1276<br>1966-1997                     | None                                        | Zopiclone (7.5, 10, or 15 mg) v placebo<br>Zolpidem (10, 15, or 20mg) v placebo                                                                                                                            | NR; 5 to 113 nights; NR<br>NR; 1 to 35 nights; NR                |
| Tang, 2015          | 11 RCTs<br>1066<br>965 in MA          | 45 -61 (NR); 55 - 100%                      | CBT-I (psychoeducation, sleep hygiene, stimulus control, sleep restriction, cognitive therapy, relaxation) v control (waitlist, treatment as usual, sleep hygiene advice, healthy eating/nutrition advice) | 3 to 7 sessions averaging 69 to 120 minutes; 60 days; 13 to 52   |
| UK                  | Inception-2014                        | Chronic pain, cancer, back pain, arthritis  | Face-to-face, phone, internet, group or individual delivery                                                                                                                                                |                                                                  |
| Trauer, 2015        | 20 RCTs<br>1162                       | 55.6 (NR); 64.3%                            | CBT (cognitive therapy, stimulus control, sleep restriction, relaxation, sleep hygiene) v control (wait-list, treatment as usual, sleep hygiene, sham, placebo)                                            | NR; NR; 4 to 48                                                  |
| Australia           | Inception-2015                        | None                                        | Group or individual delivery with aids such as telephone,                                                                                                                                                  |                                                                  |

| <b>Author, Year</b> | <b># and type of included studies</b>       | <b>Age and Sex</b><br>[mean (SD)]; % female                                                                                       | <b>Treatment comparison (doses [mg])</b>                                                                                                                                                       | <b>Frequency;</b>                                                |
|---------------------|---------------------------------------------|-----------------------------------------------------------------------------------------------------------------------------------|------------------------------------------------------------------------------------------------------------------------------------------------------------------------------------------------|------------------------------------------------------------------|
| <b>Country</b>      | <b>Sample size</b>                          | <b>Co-morbidities</b>                                                                                                             | <b>Delivery method and setting</b>                                                                                                                                                             | <b>duration of treatment; length of follow-up (range, weeks)</b> |
|                     |                                             |                                                                                                                                   | audiocassettes, or written material                                                                                                                                                            |                                                                  |
| van Straten, 2009   | 10 RCTs<br>9 in MA                          | NR                                                                                                                                | CBT (self-help, stimulus control, sleep restriction, cognitive therapy, sleep hygiene, relaxation, in-bed exercises) v wait-list control                                                       | Weekly; NR; 17 to 43.5                                           |
| Netherlands         | 1000<br>Intervention: 580<br>Control: 420   | Alcohol dependence, chronic disease                                                                                               | Audiotape, videotape, written materials; internet + face-to-face, telephone, or e-mail support; home delivery (self-help)                                                                      |                                                                  |
|                     | NR-2007                                     |                                                                                                                                   |                                                                                                                                                                                                |                                                                  |
| van Straten, 2007   | 87 RCTs                                     | NR                                                                                                                                | CBT (relaxation, sleep restriction, stimulus control, paradoxical intention, identifying and challenging dysfunctional thought) v control (wait-list, no treatment, psycho-education, placebo) | NR; 2 to 16 sessions; NR                                         |
| Netherlands         | 6303<br>Intervention: 3724<br>Control: 2579 | chronic pain; cancer; alcohol dependence; hearing problems; post-traumatic stress disorder; chronic obstructive pulmonary disease | Group, individual, phone, or self-help delivery                                                                                                                                                |                                                                  |
|                     | NR-2015                                     |                                                                                                                                   |                                                                                                                                                                                                |                                                                  |
| Xu, 2015            | 6 RCTs                                      | NR                                                                                                                                | Melatonin (1.5, 2.5, 2.9, 3, 5, 6, 8.5, or 10mg) v placebo sustained- or immediate- release                                                                                                    | NR; NR; 1.43 to 10                                               |
| China               | 484                                         | Dementia                                                                                                                          |                                                                                                                                                                                                |                                                                  |
|                     | NR-2013                                     |                                                                                                                                   |                                                                                                                                                                                                |                                                                  |
| Yang, 2014          | 3 RCTs                                      | NR                                                                                                                                | CBT + relaxation v control (sleep hygiene, treatment as usual)                                                                                                                                 | Daily (relaxation), 3 to 4 sessions weekly (CBT); NR; 4 to 8     |
| China               | 184                                         | Dialysis-dependent patients with end stage renal disease                                                                          | Relaxation training delivered via CD                                                                                                                                                           |                                                                  |

| <b>Author, Year</b>                                           | <b># and type of included studies</b>                 | <b>Age and Sex</b><br>[mean (SD)]; % female                                 | <b>Treatment comparison (doses [mg])</b>                                                                                                                                                                                                                                                        | <b>Frequency;</b>                                                |
|---------------------------------------------------------------|-------------------------------------------------------|-----------------------------------------------------------------------------|-------------------------------------------------------------------------------------------------------------------------------------------------------------------------------------------------------------------------------------------------------------------------------------------------|------------------------------------------------------------------|
| <b>Country</b>                                                | <b>Sample size</b>                                    | <b>Co-morbidities</b>                                                       | <b>Delivery method and setting</b>                                                                                                                                                                                                                                                              | <b>duration of treatment; length of follow-up (range, weeks)</b> |
|                                                               | <b>Literature search dates</b>                        |                                                                             |                                                                                                                                                                                                                                                                                                 |                                                                  |
| Ye, 2016                                                      | 14 RCTs<br>1604<br>Intervention: 1013<br>Control: 591 | NR<br>Cancer, depression                                                    | CBT (sleep hygiene education, cognitive restructuring, stimulus control, sleep restriction, relaxation therapy, hierarchy development, imagery training, scheduled pseudo desensitization, breathing control) v control (wait-list, treatment as usual, internet/email/telephone based control) | NR; NR; 4 to 52                                                  |
| China                                                         | NR-2106                                               |                                                                             | CBT delivered over the internet                                                                                                                                                                                                                                                                 |                                                                  |
| Yuan, 2010                                                    | 4 RCTs<br>Intervention: 171<br>Control: 169           | NR<br>None                                                                  | Doxepin (1 mg) v placebo<br>Doxepin (3 mg) v placebo<br>Doxepin (6 mg) v placebo<br>Doxepin (25 mg) v placebo                                                                                                                                                                                   | NR; NR; NR<br>NR; NR; NR<br>NR; NR; NR<br>NR; NR; NR             |
| China                                                         | NR-2009                                               |                                                                             |                                                                                                                                                                                                                                                                                                 |                                                                  |
| Zachariae, 2016                                               | 11 RCTs<br>1460<br>Intervention: 790<br>Control: 670  | NR<br>Cancer                                                                | CBT (stimulus control, sleep hygiene, cognitive therapy, sleep restriction, relaxation technique) v control (wait-list control, treatment as usual, active control)                                                                                                                             | NR; NR; 4 to 48                                                  |
| Denmark                                                       | 1991-2015                                             |                                                                             | Internet/home delivery                                                                                                                                                                                                                                                                          |                                                                  |
| Zhang, 2016                                                   | 9 RCTs<br>NR                                          | NR<br>Alzheimer's disease, Parkinson's disease, REM sleep behavior disorder | Melatonin (2, 2.5, 3, 5, 6, 8.5, or 50 mg/d) v placebo                                                                                                                                                                                                                                          | NR; 2 to 24; NR                                                  |
| China                                                         | NR-2015                                               |                                                                             |                                                                                                                                                                                                                                                                                                 |                                                                  |
| <b><i>Systematic reviews without meta-analysis (n=29)</i></b> |                                                       |                                                                             |                                                                                                                                                                                                                                                                                                 |                                                                  |
| Anderson, 2014                                                | 12<br>4 RCTs                                          | NR                                                                          | Quetiapine (25mg; increased to 50 or 75 mg) – pre-/post-intervention comparison                                                                                                                                                                                                                 | Daily; 2 to 12 weeks; NR                                         |
| USA                                                           | 8 design unspecified                                  | depression/major                                                            |                                                                                                                                                                                                                                                                                                 |                                                                  |

| <b>Author, Year</b>            | <b># and type of included studies</b> | <b>Age and Sex</b><br>[mean (SD)]; % female                                                                                | <b>Treatment comparison (doses [mg])</b>                                      | <b>Frequency;</b>                                                |
|--------------------------------|---------------------------------------|----------------------------------------------------------------------------------------------------------------------------|-------------------------------------------------------------------------------|------------------------------------------------------------------|
| <b>Country</b>                 | <b>Sample size</b>                    | <b>Co-morbidities</b>                                                                                                      | <b>Delivery method and setting</b>                                            | <b>duration of treatment; length of follow-up (range, weeks)</b> |
| <b>Literature search dates</b> |                                       |                                                                                                                            |                                                                               |                                                                  |
|                                | NR                                    | depressive disorder, bipolar disorder, breast cancer, Parkinson's disease, schizophrenia, polysubstance abuse (withdrawal) | Oral; inpatient<br><br>Quetiapine (25 -100mg; 340 mg) vs Placebo<br><br>Oral  |                                                                  |
| Bellon, 2006                   | 15 RCTs                               | NR                                                                                                                         | Melatonin (0.3, 0.5, 1, 2, 2.5, 5, 6, 10, or 75 mg)<br>Fast sustained release | Nightly/bedtime (4 hrs. after bedtime); 1 to 4weeks; NR          |
| USA                            | 452                                   | Schizophrenia, dementia, medically ill patients, Alzheimer's disease                                                       |                                                                               |                                                                  |
|                                |                                       |                                                                                                                            | CBT v control (unspecified)                                                   | NR; 60 minutes; 4 to 13                                          |
| Bogdanov, 2017                 | 4<br>1 RCT<br>3 Quasi-experimental    | Mean range 27 – 54                                                                                                         |                                                                               |                                                                  |
| Australia                      | NR                                    | Traumatic brain injury                                                                                                     | Problem solving therapy v sleep education<br><br>Phone call                   | Fortnightly; NR; NR                                              |
|                                |                                       |                                                                                                                            | CBT-I vs control (unspecified)                                                |                                                                  |
| Brooks, 2014                   | 4<br>3 RCTs<br>1 Quasi-experimental   | NR                                                                                                                         | Individual, in-person                                                         | 5 to 9 sessions; NR; 26                                          |
| USA                            | NR                                    | Alcohol use                                                                                                                | Progressive relaxation training v control (unspecified)                       | 10 sessions; NR; NR                                              |
|                                |                                       |                                                                                                                            | Individual, delivered by psychologist                                         |                                                                  |
| Chase, 1997                    | 5 RCTs                                | NR                                                                                                                         | Melatonin (1, 2, 5, or 75 mg)                                                 | NR; NR; NR                                                       |

| <b>Author, Year</b> | <b># and type of included studies</b> | <b>Age and Sex</b><br>[mean (SD)]; % female | <b>Treatment comparison (doses [mg])</b>                                                                                     | <b>Frequency;</b>                                                |
|---------------------|---------------------------------------|---------------------------------------------|------------------------------------------------------------------------------------------------------------------------------|------------------------------------------------------------------|
| <b>Country</b>      | <b>Sample size</b>                    | <b>Co-morbidities</b>                       | <b>Delivery method and setting</b>                                                                                           | <b>duration of treatment; length of follow-up (range, weeks)</b> |
| <b>Country</b>      | <b>Literature search dates</b>        |                                             |                                                                                                                              |                                                                  |
| USA                 | 66                                    | Patients with at least one chronic disease  | Controlled sustained release                                                                                                 |                                                                  |
| Chiesa, 2009        | 3 Observational                       | NR                                          | Pharmacotherapy (unspecified) + Mindfulness (unspecified)                                                                    | NR; NR; NR                                                       |
| Italy               | 63                                    | NR                                          |                                                                                                                              |                                                                  |
| Cimolai, 2007       | 8<br>2 RCTs<br>6 NRCTs                | NR                                          | Zopiclone (7.5 mg) – pre-/post- intervention comparison<br>Zopiclone (7.5 mg) vs Triazolam<br>Zopiclone (7.5 mg) vs Zolpidem | NR; NR; NR                                                       |
| Canada              | 474                                   | NR                                          | Zopiclone (7.5 mg) vs Flurazepam<br>Zopiclone (7.5 mg) vs. Temazepam                                                         |                                                                  |
| Citrome, 2014       | 4 RCTs                                | NR                                          | Suvorexant (15 or 20 mg) v placebo                                                                                           |                                                                  |
| USA                 | Intervention: 1279<br>Control: 1274   | None                                        | Suvorexant (20 or 40 mg) v placebo                                                                                           | NR; NR; 12                                                       |
|                     |                                       |                                             | Oral                                                                                                                         |                                                                  |
| Coe, 2012           | 2<br>1 RCT<br>1 NRCT                  | NR                                          | Quetiapine (25 mg titrated up to 75mg) – pre-/post- intervention comparison                                                  | NR; NR; 2 to 6                                                   |
| USA                 | 34                                    | None                                        | Quetiapine (25 mg) vs Placebo                                                                                                |                                                                  |
| Costello, 2014      | 4 RCTs                                | NR                                          | Melatonin (0.3, 1, 2, or 5 mg) v placebo                                                                                     | Daily; NR; NR                                                    |
| USA                 | 845                                   | None                                        | Oral; sustained release                                                                                                      |                                                                  |
|                     |                                       |                                             | Melatonin (0.3, 1, 2, or 5 mg) v placebo                                                                                     |                                                                  |
| Culpepper, 2015     | 11 RCTs                               | NR                                          | Fast release capsule; sustained-release synthetic tablet; prolonged-release tablet                                           | Daily; NR; 1 to 29                                               |
| USA                 | 1590                                  | None                                        | Diphenhydramine (50 mg) v placebo                                                                                            | Daily; NR; 1 day to 4 weeks                                      |
|                     |                                       |                                             | Tablet                                                                                                                       |                                                                  |

| <b>Author, Year</b> | <b># and type of included studies</b>              | <b>Age and Sex</b><br>[mean (SD)]; % female              | <b>Treatment comparison (doses [mg])</b>                                                                                                                                                                                                         | <b>Frequency;</b>                                                              |
|---------------------|----------------------------------------------------|----------------------------------------------------------|--------------------------------------------------------------------------------------------------------------------------------------------------------------------------------------------------------------------------------------------------|--------------------------------------------------------------------------------|
| <b>Country</b>      | <b>Sample size</b>                                 | <b>Co-morbidities</b>                                    | <b>Delivery method and setting</b>                                                                                                                                                                                                               | <b>duration of treatment; length of follow-up (range, weeks)</b>               |
|                     | <b>Literature search dates</b>                     |                                                          |                                                                                                                                                                                                                                                  |                                                                                |
| Dickerson, 2014     | 7 RCTs<br>352<br>Intervention: 220<br>Control:132  | NR<br>Cancer                                             | CBT – pre-/post- intervention comparison<br>CBT vs control (usual treatment, waitlist crossover, waitlist control)                                                                                                                               | Weekly; NR; 4 to 8                                                             |
| USA                 |                                                    |                                                          | EEG biofeedback v wait-list control                                                                                                                                                                                                              | NR; NR; NR                                                                     |
| Hellstrom, 2011     | 3 RCTs<br>209<br>Intervention: 103<br>Control: 106 | NR<br>NR                                                 | Mental imagery v usual care<br>In-person; inpatient                                                                                                                                                                                              | Daily; NR; NR                                                                  |
| Sweden              |                                                    |                                                          |                                                                                                                                                                                                                                                  |                                                                                |
| Howell, 2014        | 7 RCTs<br>NR                                       | NR<br>Cancer                                             | CBT (sleep hygiene, sleep restriction, stimulus control, cognitive restructuring, relaxation therapies) v control (usual care, wait-list control, health eating and nutrition, sleep education and hygiene, no treatment)<br>Individual delivery | Weekly; NR; 8 to 74                                                            |
| Canada              |                                                    |                                                          |                                                                                                                                                                                                                                                  |                                                                                |
| Ishak, 2012         | 7<br>NR                                            | NR<br>Breast, prostate<br>gynecological,<br>bowel cancer | Zopiclone (NR) vs Placebo<br>Zolpidem (10 mg) vs Zolpidem (10 mg)                                                                                                                                                                                | NR; NR; NR<br>5 nights/week + placebo 2<br>nights/week or once-daily;<br>NR; 2 |
| USA                 |                                                    |                                                          |                                                                                                                                                                                                                                                  |                                                                                |

| <b>Author, Year</b>            | <b># and type of included studies</b> | <b>Age and Sex</b><br>[mean (SD)]; % female | <b>Treatment comparison (doses [mg])</b>                                                                                           | <b>Frequency;</b>                                                |
|--------------------------------|---------------------------------------|---------------------------------------------|------------------------------------------------------------------------------------------------------------------------------------|------------------------------------------------------------------|
| <b>Country</b>                 | <b>Sample size</b>                    | <b>Co-morbidities</b>                       | <b>Delivery method and setting</b>                                                                                                 | <b>duration of treatment; length of follow-up (range, weeks)</b> |
| <b>Literature search dates</b> |                                       |                                             |                                                                                                                                    |                                                                  |
|                                |                                       |                                             | CBT vs control (placebo, no treatment, unspecified, usual care)                                                                    |                                                                  |
|                                |                                       |                                             | CBT group vs CBT individual:                                                                                                       | NR; NR; 14 to 52                                                 |
|                                |                                       |                                             |                                                                                                                                    | Weekly; NR; 4 to 24                                              |
|                                |                                       |                                             | CBT components: psychoeducation, sleep hygiene, stimulus control, sleep restriction, relaxation exercises, cognitive restructuring |                                                                  |
|                                |                                       |                                             | Triazolam (0.5 -1 mg) – pre-/post- intervention comparison                                                                         | NR; NR; 4                                                        |
|                                |                                       |                                             | Oral                                                                                                                               |                                                                  |
| Kolla, 2011                    | 4<br>2 RCTs<br>2 NRCTs                | NR                                          | Trazodone (50 -200 mg) v placebo                                                                                                   | NR; NR; 4 to 24                                                  |
|                                |                                       |                                             | Oral                                                                                                                               |                                                                  |
| USA                            | 240                                   | Alcohol recovery                            | Quetiapine (300 -800mg) – pre-/post- intervention comparison                                                                       | NR; NR; 16                                                       |
|                                |                                       |                                             | Oral                                                                                                                               |                                                                  |
|                                |                                       |                                             | Zolpidem (10 mg) v placebo                                                                                                         | NR; NR; NR                                                       |
|                                |                                       |                                             | Oral                                                                                                                               |                                                                  |
| Mayers, 2005                   | 6 RCTs                                | NR                                          | Trazodone (50, 75, or 100 mg) v placebo                                                                                            | NR; NR; NR                                                       |
|                                |                                       |                                             | Doxepin (25 – 50 mg) vs placebo                                                                                                    | NR; NR; NR                                                       |
| UK                             | 466                                   | Depression, dysthymia                       | Trazodone (50 mg) vs Zolpidem (10 mg)                                                                                              | NR; 2; NR                                                        |
|                                |                                       |                                             | Oral                                                                                                                               |                                                                  |

| <b>Author, Year</b> | <b># and type of included studies</b>      | <b>Age and Sex</b><br>[mean (SD)]; % female | <b>Treatment comparison (doses [mg])</b>                                                                                                                         | <b>Frequency;</b>                                                |
|---------------------|--------------------------------------------|---------------------------------------------|------------------------------------------------------------------------------------------------------------------------------------------------------------------|------------------------------------------------------------------|
| <b>Country</b>      | <b>Sample size</b>                         | <b>Co-morbidities</b>                       | <b>Delivery method and setting</b>                                                                                                                               | <b>duration of treatment; length of follow-up (range, weeks)</b> |
|                     | <b>Literature search dates</b>             |                                             |                                                                                                                                                                  |                                                                  |
| McCurry, 2007       | 11 (designs unspecified)                   | NR                                          | CBT vs control (delayed treatment, wait-list control, placebo, stress management)                                                                                | Weekly; NR; NR                                                   |
|                     |                                            |                                             | Individual delivery                                                                                                                                              |                                                                  |
| USA                 | NR                                         | Medical Illness                             | CBT vs CBT + temazepam                                                                                                                                           | Weekly; NR; NR                                                   |
|                     |                                            |                                             | Group delivery                                                                                                                                                   |                                                                  |
|                     |                                            |                                             | CBT components: sleep hygiene/education, relaxation, sleep restriction/compression, stimulus control                                                             |                                                                  |
|                     |                                            |                                             | Sleep restriction therapy, nap sleep restriction therapy, sleep compression, or sleep compression guidance v control (sleep hygiene, placebo, wait-list control) | Weekly; NR; NR                                                   |
|                     |                                            |                                             | Individual delivery                                                                                                                                              |                                                                  |
| Mendelson, 2005     | 18 (designs unspecified)                   | NR                                          | Zolpidem (10 mg) v placebo                                                                                                                                       | Nightly; NR; NR                                                  |
| USA                 | 1667<br>Intervention: 1195<br>Control: 472 | Depression                                  | Trazodone (50 to 600 mg) – pre-/post- intervention comparison                                                                                                    | NR; NR; NR                                                       |
|                     |                                            |                                             | Trazodone (50 to 300 mg) vs placebo                                                                                                                              | Nightly; NR; NR                                                  |
|                     |                                            |                                             | Trazodone (50 mg) vs Zolpidem (10 mg)                                                                                                                            | Nightly; NR; NR                                                  |
| Miller, 2014        | 9<br>4 RCTs                                | 53.3 (10.2); NR                             | Sleep restriction therapy v control (relaxation therapy,                                                                                                         | NR; NR; 13 to 52                                                 |



| <b>Author, Year</b>            | <b># and type of included studies</b>     | <b>Age and Sex</b><br>[mean (SD)]; % female                                                         | <b>Treatment comparison (doses [mg])</b>                                                                                                                                                                                                    | <b>Frequency;</b>                                                   |
|--------------------------------|-------------------------------------------|-----------------------------------------------------------------------------------------------------|---------------------------------------------------------------------------------------------------------------------------------------------------------------------------------------------------------------------------------------------|---------------------------------------------------------------------|
| <b>Country</b>                 | <b>Sample size</b>                        | <b>Co-morbidities</b>                                                                               | <b>Delivery method and setting</b>                                                                                                                                                                                                          | <b>duration of treatment; length of follow-up (range, weeks)</b>    |
| <b>Literature search dates</b> |                                           |                                                                                                     |                                                                                                                                                                                                                                             |                                                                     |
| UK                             | 1 NRCT<br>4 Observational                 | None                                                                                                | wait-list control, sleep hygiene instructions)                                                                                                                                                                                              |                                                                     |
|                                | 380                                       |                                                                                                     |                                                                                                                                                                                                                                             |                                                                     |
| Swainston<br>Harrison, 2005    | 3 RCTs                                    | NR                                                                                                  | Triazolam (0.5 mg) v placebo<br>Tablet; bedtime                                                                                                                                                                                             | NR; NR; 4                                                           |
| New Zealand                    | 145<br>Intervention: 102<br>Control: 43   | None                                                                                                | Zolpidem (10 mg) vs Placebo<br>Zolpidem (10 mg) vs Triazolam<br>Tablet; bedtime                                                                                                                                                             | NR; NR; 7<br>NR; NR; 2 to 7                                         |
| Tamrat, 2013                   | 8<br>4 RCTs<br>2 NRCTs<br>2 Observational | NR<br>Cancer, post-coronary artery bypass grafting, psychiatric disease [all hospitalized patients] | Relaxation techniques, audiotape guided imagery, or relaxation tapes v control (usual care, solitary activity, baseline)<br><br>Inpatient setting                                                                                           | Nightly; NR; NR                                                     |
| USA                            | 508                                       |                                                                                                     |                                                                                                                                                                                                                                             |                                                                     |
| Taylor, 2014                   | 16 RCTs                                   | NR<br>Depression, post-traumatic stress disorder, alcohol dependence, hypnotic                      | CBT (stimulus control, sleep restriction, relaxation therapy, cognitive therapy, image rehearsal therapy, medication withdrawal) v control (wait-list, usual care, sleep hygiene, hypnotic/medication withdrawal)<br><br>In-person delivery | NR; 2 -10 sessions; NR                                              |
| USA                            | 571                                       |                                                                                                     |                                                                                                                                                                                                                                             |                                                                     |
| Vande Griend, 2012             | 16 RCTs                                   | NR                                                                                                  | Trazodone (50 mg) vs Placebo<br>Doxepin (1, 3, 6, 25, or 50 mg) vs placebo<br>Trazodone (50 mg) vs Zolpidem (NR)                                                                                                                            | NR; 1 to 4 weeks; NR<br>NR; 1 night to 12 weeks<br>;NR<br>NR; 2; NR |
| USA                            | NR                                        | Alcohol detoxification,                                                                             |                                                                                                                                                                                                                                             |                                                                     |

| <b>Author, Year</b>            | <b># and type of included studies</b>                    | <b>Age and Sex</b><br>[mean (SD)]; % female         | <b>Treatment comparison (doses [mg])</b>                                                                                                                                              | <b>Frequency;</b>                                                |
|--------------------------------|----------------------------------------------------------|-----------------------------------------------------|---------------------------------------------------------------------------------------------------------------------------------------------------------------------------------------|------------------------------------------------------------------|
| <b>Country</b>                 | <b>Sample size</b>                                       | <b>Co-morbidities</b>                               | <b>Delivery method and setting</b>                                                                                                                                                    | <b>duration of treatment; length of follow-up (range, weeks)</b> |
| <b>Literature search dates</b> |                                                          |                                                     |                                                                                                                                                                                       |                                                                  |
|                                |                                                          | methadone-maintained                                | Diphenhydramine (50 mg) v placebo                                                                                                                                                     | NR; 5 to 28 days; NR                                             |
| Venables, 2014                 | 22<br>16 RCTs<br>5 Quasi-experimental<br>1 Observational | NR                                                  | Self-help CBT – pre-/post- intervention comparison<br>Video; home                                                                                                                     | NR; NR; NR                                                       |
| UK                             | 1794                                                     | adult cancer patients undergoing curative treatment | Professionally administered CBT – pre-/post- intervention comparison<br>Group CBT – pre-/post- intervention comparison                                                                | NR; NR; NR<br>NR; NR; NR                                         |
| Vural, 2014                    | 5<br>4 RCTs<br>1 NRCTs                                   | NR                                                  | Melatonin (0.4, 0.5, 2, or 4 mg) v control (unspecified) sustained release transbuccal patch or immediate release                                                                     | Nightly (bedtime); 4 to 42 days; 1 to 24                         |
| Netherlands                    | 207                                                      | NR                                                  | CBT (stimulus control, sleep restriction, cognitive therapy, sleep hygiene education, sleep scheduling) vs control (quasi desensitization, self-monitoring, sleep hygiene, wait list) | NR; NR; 12 to 104                                                |
| Wang, 2005                     | 6 RCTs                                                   | NR                                                  | CBT (stimulus control, sleep restriction, sleep hygiene education) vs relaxation                                                                                                      | NR; NR; 24                                                       |
| Taiwan                         | 255                                                      | NR                                                  | Behavioural therapy (stimulus control, relaxation therapy, sleep education) v stimulus control                                                                                        | NR; NR; 4                                                        |
| Wine, 2009                     | 3 NRCTs                                                  | NR                                                  | Quetiapine (25 -75, or 12.5 -50mg) – pre-/post-                                                                                                                                       | Bedtime, as needed; NR; 6                                        |

| <b>Author, Year</b>            | <b># and type of included studies</b> | <b>Age and Sex</b><br>[mean (SD)]; % female           | <b>Treatment comparison (doses [mg])</b>                                        | <b>Frequency;</b>                                                |
|--------------------------------|---------------------------------------|-------------------------------------------------------|---------------------------------------------------------------------------------|------------------------------------------------------------------|
| <b>Country</b>                 | <b>Sample size</b>                    | <b>Co-morbidities</b>                                 | <b>Delivery method and setting</b>                                              | <b>duration of treatment; length of follow-up (range, weeks)</b> |
| <b>Literature search dates</b> |                                       |                                                       |                                                                                 |                                                                  |
| USA                            | Total:50                              | Posttraumatic stress disorder,<br>Parkinson's disease | intervention comparison<br>Quetiapine (25 -300mg) v untreated control<br>Tablet | to 12<br>Bedtime, as needed; NR; 6                               |
| Yeung, 2015                    | 8 RCTs                                | NR                                                    | Doxepin (3, 6, or 25-300 mg) v placebo<br>Oral                                  | NR; NR; 4 to 12                                                  |
| Hong Kong                      | Total:1513                            | Anxiety, depression                                   |                                                                                 |                                                                  |

## Appendix D: AMSTAR Results

| Author, Year                                        | 1. PICO components | 2. A priori design | 3. Rationale for study selection | 4. Literature search | 5. Duplicate Selection | 6. Duplicate Abstraction | 7. List of excluded studies | 8. Description of included studies | 9a. RoB in RCTs | 9b. RoB in non-randomized studies | 10. Funding sources | 11. Appropriate MA methods | 12. Used RoB in MA | 13. Used RoB in interpreting results | 14. Discussion of heterogeneity | 15. Publication bias | 16. Conflict of Interest | Overall Rating |                |
|-----------------------------------------------------|--------------------|--------------------|----------------------------------|----------------------|------------------------|--------------------------|-----------------------------|------------------------------------|-----------------|-----------------------------------|---------------------|----------------------------|--------------------|--------------------------------------|---------------------------------|----------------------|--------------------------|----------------|----------------|
| <i>Systematic Reviews with meta-analysis (n=35)</i> |                    |                    |                                  |                      |                        |                          |                             |                                    |                 |                                   |                     |                            |                    |                                      |                                 |                      |                          |                |                |
| Ballesio, 2017                                      | Y                  | Y                  | Y                                | Partial Y            | Y                      | Y                        | Y                           | Y                                  | Y               | Includes only RCTs                | Y                   | Y                          | Y                  | Y                                    | Y                               | Y                    | Y                        | Y              | High           |
| Brasure, 2015                                       | Y                  | Y                  | Y                                | Y                    | Y                      | N                        | Y                           | Y                                  | Y               | Includes only RCTs                | Y                   | Y                          | Y                  | Y                                    | Y                               | N                    | Y                        | Y              | High           |
| Buscemi, 2004                                       | Y                  | Partial Y          | Y                                | Y                    | Y                      | Y                        | Y                           | Y                                  | Partial Y       | Includes only RCTs                | Y                   | Y                          | N                  | Y                                    | Y                               | Y                    | Y                        | Y              | High           |
| Buscemi, 2005                                       | Y                  | N                  | N                                | Partial Y            | Y                      | N                        | Y                           | Partial Y                          | Y               | Includes only RCTs                | Y                   | Y                          | Y                  | N                                    | Y                               | Y                    | Y                        | Y              | High           |
| Cheng, 2012                                         | Y                  | N                  | N                                | Y                    | N                      | N                        | N                           | Y                                  | Y               | Includes only RCTs                | N                   | Y                          | Y                  | Y                                    | N                               | N                    | Y                        | Y              | Low            |
| Ferracioli, 2013                                    | Y                  | N                  | N                                | N                    | Y                      | N                        | N                           | Partial Y                          | N               | Includes only RCTs                | N                   | Y                          | N                  | N                                    | Y                               | Y                    | Y                        | Y              | Critically Low |
| Gong, 2016                                          | Y                  | N                  | N                                | Partial Y            | Y                      | Y                        | N                           | Partial Y                          | Y               | Includes only RCTs                | N                   | Y                          | N                  | N                                    | Y                               | Y                    | Y                        | Y              | Low            |

| <b>Author, Year</b> | 1. PICO components | 2. A priori design | 3. Rationale for study selection | 4. Literature search | 5. Duplicate Selection | 6. Duplicate Abstraction | 7. List of excluded studies | 8. Description of included studies | 9a. RoB in RCTs | 9b. RoB in non-randomized studies | 10. Funding sources | 11. Appropriate MA methods | 12. Used RoB in MA | 13. Used RoB in interpreting results | 14. Discussion of heterogeneity | 15. Publication bias | 16. Conflict of Interest | <b>Overall Rating</b> |
|---------------------|--------------------|--------------------|----------------------------------|----------------------|------------------------|--------------------------|-----------------------------|------------------------------------|-----------------|-----------------------------------|---------------------|----------------------------|--------------------|--------------------------------------|---------------------------------|----------------------|--------------------------|-----------------------|
| Ho, 2015            | Y                  | N                  | N                                | Partial Y            | Y                      | Y                        | N                           | Y                                  | Y               | Includes only RCTs                | N                   | Y                          | Y                  | Y                                    | N                               | Y                    | Y                        | Low                   |
| Ho, 2016            | Y                  | N                  | Y                                | Partial Y            | Y                      | Y                        | N                           | Partial Y                          | Y               | Includes only RCTs                | N                   | Y                          | N                  | N                                    | N                               | N                    | Y                        | Low                   |
| Hwang, 2016         | Y                  | N                  | N                                | Partial Y            | Y                      | Y                        | N                           | N                                  | Partial Y       | N                                 | N                   | Y                          | N                  | N                                    | N                               | Y                    | N                        | Critically Low        |
| Irwin, 2006         | Y                  | N                  | N                                | Partial Y            | N                      | N                        | N                           | Partial Y                          | N               | Includes only RCTs                | N                   | Y                          | N                  | N                                    | Y                               | N                    | N                        | Critically Low        |
| Johnson, 2016       | Y                  | Y                  | Y                                | Y                    | Y                      | Y                        | N                           | Partial Y                          | Y               | Includes only RCTs                | N                   | Y                          | N                  | Y                                    | Y                               | Y                    | Y                        | Moderate              |
| Kishi, 2015         | N                  | N                  | N                                | Partial Y            | N                      | Y                        | N                           | Partial Y                          | Y               | Includes only RCTs                | N                   | Y                          | Y                  | Y                                    | Y                               | Y                    | Y                        | Moderate              |
| Koffel, 2015        | N                  | N                  | Y                                | Partial Y            | N                      | N                        | N                           | N                                  | Y               | Includes only RCTs                | Y                   | N                          | N                  | N                                    | N                               | Y                    | N                        | Critically Low        |
| Kuriyama, 2017      | N                  | N                  | N                                | Y                    | Y                      | Y                        | N                           | Y                                  | Y               | Includes only RCTs                | N                   | Y                          | Y                  | Y                                    | N                               | N                    | Y                        | Moderate              |
| Lee, NR             | Y                  | N                  | N                                | Y                    | Y                      | Y                        | N                           | Partial Y                          | Y               | Includes only RCTs                | N                   | Y                          | N                  | N                                    | Y                               | N                    | Y                        | Critically Low        |

| <b>Author, Year</b> | 1. PICO components | 2. A priori design | 3. Rationale for study selection | 4. Literature search | 5. Duplicate Selection | 6. Duplicate Abstraction | 7. List of excluded studies | 8. Description of included studies | 9a. RoB in RCTs | 9b. RoB in non-randomized studies | 10. Funding sources | 11. Appropriate MA methods | 12. Used RoB in MA | 13. Used RoB in interpreting results | 14. Discussion of heterogeneity | 15. Publication bias | 16. Conflict of Interest | <b>Overall Rating</b> |
|---------------------|--------------------|--------------------|----------------------------------|----------------------|------------------------|--------------------------|-----------------------------|------------------------------------|-----------------|-----------------------------------|---------------------|----------------------------|--------------------|--------------------------------------|---------------------------------|----------------------|--------------------------|-----------------------|
| Liu, 2017           | Y                  | Partial Y          | N                                | Partial Y            | Y                      | N                        | N                           | Y                                  | Y               | Includes only RCTs                | N                   | Y                          | N                  | N                                    | Y                               | Y                    | Y                        | Critically Low        |
| McCleery, 2016      | Y                  | Partial Y          | Y                                | Partial Y            | Y                      | Y                        | Y                           | Partial Y                          | Partial Y       | Includes only RCTs                | N                   | Y                          | Y                  | Y                                    | Y                               | N                    | Y                        | High                  |
| Montgomery, 2003    | Y                  | Y                  | N                                | Y                    | Y                      | Y                        | Y                           | Y                                  | Y               | Includes only RCTs                | N                   | Y                          | N                  | Y                                    | Y                               | Y                    | Y                        | High                  |
| Navarro-Bravo, 2015 | Y                  | N                  | N                                | Partial Y            | Y                      | Y                        | N                           | Partial Y                          | Y               | Includes only RCTs                | N                   | Y                          | N                  | N                                    | Y                               | Y                    | Y                        | Moderate              |
| Okajima, 2011       | Y                  | N                  | N                                | N                    | N                      | N                        | N                           | Y                                  | N               | Includes only RCTs                | N                   | N                          | N                  | N                                    | N                               | Y                    | N                        | Critically Low        |
| Sateia, 2017        | Y                  | N                  | N                                | N                    | Y                      | N                        | N                           | Partial Y                          | Partial Y       | Y                                 | Y                   | Y                          | N                  | Y                                    | N                               | Y                    | Y                        | Critically Low        |
| Seda, 2015          | Y                  | N                  | N                                | Partial Y            | N                      | N                        | N                           | Partial Y                          | N               | Includes only RCTs                | N                   | Y                          | N                  | N                                    | Y                               | Y                    | N                        | Low                   |
| Seyffert, 2016      | Y                  | Partial Y          | N                                | Y                    | N                      | Y                        | N                           | Partial Y                          | Y               | Includes only RCTs                | Y                   | Y                          | Y                  | Y                                    | N                               | Y                    | Y                        | Low                   |
| Soldatos, 2009      | Y                  | N                  | N                                | N                    | N                      | N                        | Y                           | Partial Y                          | N               | N                                 | Y                   | Y                          | N                  | N                                    | N                               | N                    | N                        | Critically Low        |



| Author, Year                                           | 1. PICO components | 2. A priori design | 3. Rationale for study selection | 4. Literature search | 5. Duplicate Selection | 6. Duplicate Abstraction | 7. List of excluded studies | 8. Description of included studies | 9a. RoB in RCTs | 9b. RoB in non-randomized studies | 10. Funding sources | 11. Appropriate MA methods | 12. Used RoB in MA | 13. Used RoB in interpreting results | 14. Discussion of heterogeneity | 15. Publication bias | 16. Conflict of Interest | Overall Rating |
|--------------------------------------------------------|--------------------|--------------------|----------------------------------|----------------------|------------------------|--------------------------|-----------------------------|------------------------------------|-----------------|-----------------------------------|---------------------|----------------------------|--------------------|--------------------------------------|---------------------------------|----------------------|--------------------------|----------------|
| Zhang, 2016                                            | Y                  | N                  | N                                | Partial Y            | N                      | Y                        | N                           | Partial Y                          | Y               | Includes only RCTs                | N                   | Y                          | N                  | N                                    | N                               | Y                    | Y                        | Critically Low |
| <b>Systematic reviews without meta-analysis (n=29)</b> |                    |                    |                                  |                      |                        |                          |                             |                                    |                 |                                   |                     |                            |                    |                                      |                                 |                      |                          |                |
| Anderson, 2014                                         | N                  | N                  | N                                | Partial Y            | N                      | N                        | N                           | Partial Y                          | N               | N                                 | N                   | No MA                      | No MA              | N                                    | N                               | No MA                | N                        | Critically Low |
| Bellon, 2006                                           | N                  | N                  | N                                | Partial Y            | N                      | N                        | N                           | Partial Y                          | N               | N                                 | N                   | No MA                      | No MA              | N                                    | N                               | No MA                | N                        | Critically Low |
| Bogdanov, 2017                                         | N                  | N                  | N                                | Partial Y            | N                      | N                        | N                           | Partial Y                          | Y               | Y                                 | N                   | No MA                      | No MA              | N                                    | N                               | No MA                | Y                        | Low            |
| Brooks, 2014                                           | N                  | N                  | N                                | Partial Y            | N                      | N                        | N                           | Partial Y                          | Partial Y       | Partial Y                         | N                   | No MA                      | No MA              | Y                                    | N                               | No MA                | Y                        | Low            |
| Chase, 1997                                            | N                  | N                  | N                                | N                    | N                      | N                        | N                           | Partial Y                          | N               | N                                 | N                   | No MA                      | No MA              | N                                    | N                               | No MA                | N                        | Critically Low |
| Chiesa, 2009                                           | Y                  | N                  | Y                                | Partial Y            | N                      | N                        | N                           | Partial Y                          | Y               | Y                                 | N                   | No MA                      | No MA              | N                                    | N                               | No MA                | N                        | Low            |
| Cimolai, 2007                                          | N                  | N                  | N                                | N                    | N                      | N                        | N                           | Partial Y                          | N               | N                                 | N                   | No MA                      | No MA              | N                                    | N                               | No MA                | Y                        | Critically Low |
| Citrome, 2014                                          | N                  | N                  | N                                | Partial Y            | N                      | N                        | N                           | Partial Y                          | N               | N                                 | N                   | No MA                      | No MA              | N                                    | No MA                           | No MA                | Y                        | Critically Low |
| Coe, 2012                                              | N                  | N                  | N                                | Partial Y            | N                      | N                        | N                           | Partial Y                          | N               | N                                 | N                   | No MA                      | No MA              | N                                    | N                               | No MA                | Y                        | Critically Low |
| Costello, 2014                                         | Y                  | N                  | Y                                | Partial Y            | Y                      | N                        | N                           | Y                                  | Y               | Includes only RCTs                | Y                   | No MA                      | No MA              | Y                                    | Y                               | No MA                | Y                        | Moderate       |
| Culpepper, 2015                                        | Y                  | Partial Y          | Y                                | Partial Y            | N                      | N                        | N                           | Partial Y                          | N               | Includes only RCTs                | N                   | No MA                      | No MA              | N                                    | N                               | No MA                | Y                        | Critically Low |



| <b>Author, Year</b>      | 1. PICO components | 2. A priori design | 3. Rationale for study selection | 4. Literature search | 5. Duplicate Selection | 6. Duplicate Abstraction | 7. List of excluded studies | 8. Description of included studies | 9a. RoB in RCTs | 9b. RoB in non-randomized studies | 10. Funding sources | 11. Appropriate MA methods | 12. Used RoB in MA | 13. Used RoB in interpreting results | 14. Discussion of heterogeneity | 15. Publication bias | 16. Conflict of Interest | <b>Overall Rating</b> |
|--------------------------|--------------------|--------------------|----------------------------------|----------------------|------------------------|--------------------------|-----------------------------|------------------------------------|-----------------|-----------------------------------|---------------------|----------------------------|--------------------|--------------------------------------|---------------------------------|----------------------|--------------------------|-----------------------|
| Dickerson, 2014          | Y                  | Partial Y          | Y                                | Partial Y            | Y                      | Y                        | Partial Y                   | Partial Y                          | Partial Y       | Includes only RCTs                | N                   | No MA                      | No MA              | Y                                    | Y                               | No MA                | Y                        | High                  |
| Hellstrom, 2011          | N                  | Partial Y          | N                                | Partial Y            | N                      | N                        | Y                           | Y                                  | Y               | Includes only RCTs                | N                   | No MA                      | No MA              | Y                                    | N                               | No MA                | N                        | Moderate              |
| Howell, 2014             | N                  | Partial Y          | N                                | Partial Y            | Y                      | N                        | N                           | Partial Y                          | Y               | Partial Y                         | Y                   | No MA                      | No MA              | N                                    | N                               | No MA                | Y                        | Moderate              |
| Ishak, 2012              | N                  | Partial Y          | N                                | Partial Y            | Y                      | N                        | N                           | Partial Y                          | N               | N                                 | N                   | No MA                      | No MA              | N                                    | N                               | No MA                | Y                        | Low                   |
| Kolla, 2011              | N                  | N                  | N                                | Partial Y            | N                      | N                        | N                           | Partial Y                          | N               | N                                 | N                   | No MA                      | No MA              | N                                    | N                               | No MA                | N                        | Critically Low        |
| Mayers, 2005             | Y                  | N                  | Y                                | Partial Y            | N                      | N                        | N                           | Partial Y                          | N               | Includes only RCTs                | N                   | No MA                      | No MA              | N                                    | N                               | No MA                | N                        | Critically Low        |
| McCurry, 2007            | Y                  | N                  | N                                | N                    | N                      | Y                        | N                           | Partial Y                          | N               | N                                 | N                   | No MA                      | No MA              | N                                    | N                               | No MA                | N                        | Critically Low        |
| Mendelson, 2005          | N                  | N                  | N                                | Partial Y            | N                      | N                        | N                           | Partial Y                          | N               | N                                 | N                   | No MA                      | No MA              | N                                    | N                               | No MA                | N                        | Critically Low        |
| Miller, 2014             | Y                  | N                  | Y                                | Partial Y            | N                      | N                        | Y                           | Partial Y                          | Y               | Y                                 | N                   | No MA                      | No MA              | Y                                    | N                               | No MA                | Y                        | High                  |
| Swainston Harrison, 2005 | Y                  | Partial Y          | Y                                | Partial Y            | N                      | N                        | N                           | Partial Y                          | N               | N                                 | N                   | No MA                      | No MA              | N                                    | N                               | No MA                | N                        | Critically Low        |
| Tamrat, 2013             | Y                  | Partial Y          | N                                | N                    | Y                      | Y                        | N                           | Partial Y                          | Y               | Y                                 | N                   | No MA                      | No MA              | Y                                    | Y                               | No MA                | Y                        | Low                   |
| Taylor, 2014             | N                  | N                  | N                                | Partial Y            | N                      | N                        | N                           | Partial Y                          | N               | Includes only RCTs                | N                   | No MA                      | No MA              | N                                    | N                               | N                    | Y                        | Critically Low        |

| <b>Author, Year</b> | 1. PICO components | 2. A priori design | 3. Rationale for study selection | 4. Literature search | 5. Duplicate Selection | 6. Duplicate Abstraction | 7. List of excluded studies | 8. Description of included studies | 9a. RoB in RCTs | 9b. RoB in non-randomized studies | 10. Funding sources | 11. Appropriate MA methods | 12. Used RoB in MA | 13. Used RoB in interpreting results | 14. Discussion of heterogeneity | 15. Publication bias | 16. Conflict of Interest | <b>Overall Rating</b> |
|---------------------|--------------------|--------------------|----------------------------------|----------------------|------------------------|--------------------------|-----------------------------|------------------------------------|-----------------|-----------------------------------|---------------------|----------------------------|--------------------|--------------------------------------|---------------------------------|----------------------|--------------------------|-----------------------|
| Vande Griend, 2012  | N                  | N                  | N                                | Partial Y            | N                      | N                        | N                           | Partial Y                          | N               | Includes only RCTs                | N                   | No MA                      | No MA              | N                                    | N                               | N                    | Y                        | Critically Low        |
| Venables, 2014      | N                  | N                  | N                                | Partial Y            | N                      | N                        | N                           | Y                                  | N               | N                                 | N                   | No MA                      | No MA              | N                                    | N                               | No MA                | N                        | Critically Low        |
| Vural, 2014         | Y                  | N                  | N                                | Partial Y            | N                      | N                        | Partial Y                   | N                                  | N               | N                                 | N                   | No MA                      | No MA              | N                                    | N                               | No MA                | Y                        | Critically Low        |
| Wang, 2005          | Y                  | Partial Y          | Y                                | Partial Y            | Y                      | Y                        | N                           | Partial Y                          | Partial Y       | Includes only RCTs                | N                   | No MA                      | No MA              | Y                                    | Y                               | No MA                | N                        | Moderate              |
| Wine, 2009          | N                  | N                  | N                                | Partial Y            | N                      | N                        | N                           | Partial Y                          | N               | N                                 | N                   | No MA                      | No MA              | N                                    | N                               | No MA                | N                        | Critically Low        |
| Yeung, 2015         | Y                  | Partial Y          | N                                | Y                    | Y                      | Y                        | N                           | Y                                  | Y               | Includes only RCTs                | Y                   | No MA                      | No MA              | Y                                    | Y                               | No MA                | Y                        | Moderate              |

## Appendix E: Detailed Tables of Results

**Table E1. Benzodiazepines**

| Author, Year<br>Synthesis type   | AMSTAR<br>rating  | Intervention and sample<br>size                                                                        | # of<br>studies | Measurement<br>method           | Pooled Estimates (MA) or<br>Narrative Results (from SR with no MA)*          |
|----------------------------------|-------------------|--------------------------------------------------------------------------------------------------------|-----------------|---------------------------------|------------------------------------------------------------------------------|
| <i>Sleep onset latency</i>       |                   |                                                                                                        |                 |                                 |                                                                              |
| Buscemi, 2005<br>Meta-analysis   | High              | Flurazepam: 317                                                                                        | 10              | sleep diary,<br>polysomnography | Mean difference [95% CI]:<br><b>-23.21[-34.26, -12.16]</b> I-squared: 51.8%  |
|                                  |                   | Placebo: 215                                                                                           |                 |                                 |                                                                              |
|                                  |                   | Temazepam: 128                                                                                         | 4               | sleep diary,<br>polysomnography | Mean difference [95% CI]:<br>-11.61 [-23.64, 0.42] I-squared: 84%            |
|                                  |                   | Placebo: 78                                                                                            |                 |                                 |                                                                              |
|                                  |                   | Triazolam: 290                                                                                         | 8               | sleep diary,<br>polysomnography | Mean difference [95% CI]:<br><b>-19.69 [-28.36, -11.01]</b> I-squared: 69.2% |
|                                  |                   | Placebo: 249                                                                                           |                 |                                 |                                                                              |
| Sateia, 2017<br>Meta-analysis    | Critically<br>Low | Temazepam: 36<br>Placebo: 36                                                                           | 2               | subjective measure              | Mean difference [95% CI]:<br><b>-20.06 [-39.05, -1.07]</b> I-squared: 68%    |
| Soldatos, 1999<br>Meta-analysis  | Critically<br>Low | Triazolam: NR<br>Placebo: NR                                                                           | 28              | sleep laboratory                | Mean difference [95% CI]:<br><b>-15.5 [-19.5, -11.4]</b> I-squared: NR       |
| <i>Total sleep time</i>          |                   |                                                                                                        |                 |                                 |                                                                              |
| Sateia, 2017<br>Meta-analysis    | Critically<br>Low | Temazepam: 36<br>Placebo: 36                                                                           | 2               | subjective measure              | Mean difference [95% CI]:<br><b>64.41 [8.07, 120.76]</b> I-squared: 59%      |
| Soldatos, 1999<br>Meta-analysis  | Critically<br>Low | Triazolam: NR<br>Placebo: NR                                                                           | 12              | sleep laboratory                | Mean difference [95% CI]:<br><b>49.2 [36, 62.5]</b> I-squared: NR            |
| Kolla, 2011<br>Systematic Review | Critically<br>Low | Triazolam:<br>23 (enrolled); 12<br>(analysis)<br><br>No comparator<br>(pre- and post-<br>intervention) | 1               | sleep diaries                   | <b>Significant improvement</b> in depth and duration of sleep                |

| Author, Year<br>Synthesis type                   | AMSTAR<br>rating  | Intervention and sample<br>size          | # of<br>studies | Measurement<br>method           | Pooled Estimates (MA) or<br>Narrative Results (from SR with no MA)*       |
|--------------------------------------------------|-------------------|------------------------------------------|-----------------|---------------------------------|---------------------------------------------------------------------------|
| Swainston<br>Harrison, 2005<br>Systematic Review | Critically<br>Low | Triazolam<br>Placebo<br>Total sample: 16 | 1               | NR                              | Change in outcome (p-value):<br><b>+41 vs +25 minutes (p&lt;0.05)</b>     |
| <i>Wake after sleep onset</i>                    |                   |                                          |                 |                                 |                                                                           |
| Buscemi, 2005<br>Meta-analysis                   | High              | Temazepam: 38<br>Placebo: 39             | 2               | sleep diary,<br>polysomnography | Mean difference [95% CI]:<br><b>-23.66 [-36.57, -10.76]</b> I-squared: 0% |
|                                                  |                   | Triazolam: 30<br>Placebo: 27             | 2               | sleep diary,<br>polysomnography | Mean difference [95% CI]:<br><b>-39.96 [-64.47, -15.45]</b> I-squared: 0% |
| <i>Sleep quality</i>                             |                   |                                          |                 |                                 |                                                                           |
| Sateia, 2017<br>Meta-analysis                    | Critically<br>Low | Temazepam: 39<br>Placebo: 39             | 2               | subjective measure              | Mean difference [95% CI]:<br>0.25 [-0.20, 0.70] I-squared: 0%             |

\* bolded results indicate statistical significance as reported by review

**Table E2. Non-benzodiazepines**

| Author, Year<br>Synthesis type    | AMSTAR<br>rating  | Intervention and sample<br>size | # of<br>studies | Measurement<br>method                | Pooled Estimates (MA) or<br>Narrative Results (from SR with no MA)           |
|-----------------------------------|-------------------|---------------------------------|-----------------|--------------------------------------|------------------------------------------------------------------------------|
| <i>Sleep onset latency</i>        |                   |                                 |                 |                                      |                                                                              |
| Brasure, 2015<br>Meta-analysis    | High              | Zolpidem: 181<br>Placebo: 192   | 4               | subjective sleep<br>latency, minutes | Mean difference [95% CI]:<br><b>-14.95 [-22.10, -7.80]</b> I-squared: 0%     |
|                                   |                   | Zolpidem: 177<br>Placebo: 178   | 2               | subjective report,<br>minutes        | Mean difference [95% CI]:<br><b>-14.8 [-23.41, -6.19]</b> I-squared: 0%      |
| Buscemi,<br>2005<br>Meta-analysis | High              | Zolpidem: 997<br>Placebo: 808   | 17              | sleep diary,<br>polysomnography      | Mean difference [95% CI]:<br><b>-12.75 [-16.42, -9.08]</b> I-squared: 4.5%   |
|                                   |                   | Zopiclone: 178<br>Placebo: 178  | 5               | sleep diary,<br>polysomnography      | Mean difference [95% CI]:<br><b>-30.91 [-49.37, -12.44]</b> I-squared: 73.9% |
| Sateia, 2017<br>Meta-analysis     | Critically<br>Low | Zolpidem: 181<br>Placebo: 185   | 5               | polysomnography                      | Mean difference [95% CI]:<br><b>-11.65 [-19.15, -4.15]</b> I-squared: 78%    |

| Author, Year<br>Synthesis type                   | AMSTAR<br>rating  | Intervention and sample<br>size           | # of<br>studies | Measurement<br>method | Pooled Estimates (MA) or<br>Narrative Results (from SR with no MA)                                                             |
|--------------------------------------------------|-------------------|-------------------------------------------|-----------------|-----------------------|--------------------------------------------------------------------------------------------------------------------------------|
|                                                  |                   | Zolpidem: 543<br>Placebo: 558             | 10              | subjective measure    | Mean difference [95% CI]:<br><b>-19.55 [-24.90, -14.20]</b> I-squared: 95%                                                     |
| Soldatos, 1999<br>Meta-analysis                  | Critically<br>Low | Zolpidem: NR<br>Placebo: NR               | 29              | sleep laboratory      | Mean difference [95% CI]:<br><b>-17.6 [-23.2, -12]</b> I-squared: NR                                                           |
|                                                  |                   | Zolpidem: NR<br>Placebo: NR               | 14              | sleep laboratory      | Mean difference [95% CI]:<br><b>-19.1 [-26.7, -11.5]</b> I-squared: NR                                                         |
| Mayers, 2005<br>Systematic Review                | Critically<br>Low | Zolpidem<br>Placebo<br>Total sample: 306  | 1               | NR                    | <b>Significant decrease</b> in sleep latency compared to placebo<br>( <b>p&lt;0.05</b> )                                       |
| Mendelson, 2005<br>Systematic Review             | Critically<br>Low | Zolpidem<br>Placebo<br>Total sample: 306  | 1               | self-reported         | The zolpidem group demonstrated <b>significant improvement</b><br>compared with placebo for sleep latency ( <b>p = 0.037</b> ) |
| Swainston<br>Harrison, 2005<br>Systematic Review | Critically<br>Low | Zolpidem<br>Triazolam<br>Total sample: 22 | 1               | NR                    | Change in outcome (p-value):<br>-23 v -15 minutes (p=NS)                                                                       |
| <i>Total sleep time</i>                          |                   |                                           |                 |                       |                                                                                                                                |
| Brasure, 2015<br>Meta-analysis                   | High              | Zolpidem: 82<br>Placebo: 85               | 3               | subjective report     | Mean difference [95% CI]:<br><b>22.95 [2.01, 43.88]</b> I-squared: 0%                                                          |
| Sateia, 2017<br>Meta-analysis                    | Critically<br>Low | Zolpidem: 55<br>Placebo: 57               | 2               | PSG                   | Mean difference [95% CI]:<br><b>28.91 [10.85, 46.97]</b> I-squared: 49%                                                        |
|                                                  |                   | Zolpidem: 435<br>Placebo: 455             | 8               | subjective measure    | Mean difference [95% CI]:<br><b>30.04 [15.12, 44.96]</b> I-squared: 71%                                                        |
| Soldatos, 1999<br>Meta-analysis                  | Critically<br>Low | Zolpidem: NR<br>Placebo: NR               | 23              | sleep laboratory      | Mean difference [95% CI]:<br><b>32 [21.7, 42.3]</b> I-squared: NR                                                              |
|                                                  |                   | Zopiclone: NR<br>Placebo: NR              | 13              | sleep laboratory      | Mean difference [95% CI]:<br><b>56.3 [37.3, 75.4]</b> I-squared: NR                                                            |
| Mayers, 2005<br>Systematic Review                | Critically<br>Low | Zolpidem<br>Placebo<br>Total sample: 306  | 1               | NR                    | <b>Significant increase</b> in total sleep time compared to placebo<br>( <b>p&lt;0.05</b> )                                    |
| Swainston<br>Harrison, 2005<br>Systematic Review | Critically<br>Low | Zolpidem<br>Placebo<br>Total sample: 16   | 1               | NR                    | Change in outcome (p-value):<br><b>+35 vs +29 minutes (p&lt;0.05)</b>                                                          |

| Author, Year<br>Synthesis type                   | AMSTAR<br>rating  | Intervention and sample<br>size            | # of<br>studies | Measurement<br>method                    | Pooled Estimates (MA) or<br>Narrative Results (from SR with no MA)                                                                              |
|--------------------------------------------------|-------------------|--------------------------------------------|-----------------|------------------------------------------|-------------------------------------------------------------------------------------------------------------------------------------------------|
|                                                  | Critically<br>Low | Zolpidem<br>Triazolam<br>Total sample: 16  | 1               | NR                                       | Change in outcome (p-value):<br>+35 vs -112 minutes (p<0.05)                                                                                    |
| <i>Wake after sleep onset</i>                    |                   |                                            |                 |                                          |                                                                                                                                                 |
| Buscemi,<br>2005<br>Meta-analysis                | High              | Zolpidem: 345<br>Placebo: 345              | 7               | sleep diary<br>polysomnography           | Mean difference [95% CI]:<br>-8.46[-20.17, 3.26] I-squared: 64.1%                                                                               |
| Sateia, 2017<br>Meta-analysis                    | Critically<br>Low | Zolpidem: 55<br>Placebo: 57                | 2               | polysomnography                          | Mean difference [95% CI]:<br><b>-25.46 [-32.99, -17.94]</b> I-squared: 0%                                                                       |
|                                                  |                   | Zolpidem: 384<br>Placebo: 400              | 6               | subjective measure                       | Mean difference [95% CI]:<br><b>-13.57 [-19.84, -7.30]</b> I-squared: 92%                                                                       |
| Mayers, 2005<br>Systematic Review                | Critically<br>Low | Zolpidem<br>Placebo<br>Total sample: 306   | 1               | NR                                       | <b>Significant improvement</b> in WASO compared to placebo<br>( <b>p=0.04</b> )                                                                 |
| Mendelson, 2005<br>Systematic Review             | Critically<br>Low | Zolpidem<br>Placebo<br>Total sample: 306   | 1               | self-reported                            | Relative to placebo, patients reported <b>significant improvement</b> in [WASO] with trazodone and zolpidem during week 1 ( <b>p &lt; .02</b> ) |
| Swainston<br>Harrison, 2005<br>Systematic Review | Critically<br>Low | Zolpidem: 16<br>Placebo: 69                | 2               | NR                                       | Change in outcome (p-value):<br><b>-35 vs +116 min (p&lt;0.05)</b><br>+6 vs -8 min (p=NS)                                                       |
|                                                  | Critically<br>Low | Zolpidem<br>Triazolam<br>Total sample: 102 | 3               | NR                                       | Change in outcome (p-value):<br><b>-35 vs +116 min (p&lt;0.05);</b><br><b>-38 vs +17 min (p&lt;0.01);</b><br>+6 vs +19 min (p=NS)               |
| <i>Sleep Quality</i>                             |                   |                                            |                 |                                          |                                                                                                                                                 |
| Brasure, 2015<br>Meta-analysis                   | High              | Zolpidem: 289<br>Placebo: 268              | 3               | participants<br>reporting<br>improvement | Mean difference [95% CI]:<br><b>1.4 [1.20, 1.65]</b> I-squared: 14%                                                                             |
| Sateia, 2017<br>Meta-analysis                    | Critically<br>Low | Zolpidem: 314<br>Placebo: 324              | 6               | subjective measure                       | Standardized mean difference [95% CI]:<br><b>0.64 [0.03, 1.26]</b> I-squared: 92%                                                               |
| Mayers, 2005<br>Systematic Review                | Critically<br>Low | Zolpidem<br>Placebo<br>Total sample: 306   | 1               | NR                                       | <b>Significant improvement</b> on sleep quality compared to placebo ( <b>p=0.0003</b> )                                                         |
| Mendelson, 2005<br>Systematic Review             | Critically<br>Low | Zolpidem<br>Placebo<br>Total sample: 306   | 1               | self-reported                            | Relative to placebo, patients reported <b>significant improvement</b> in [sleep quality] with zolpidem during week 1<br>( <b>p &lt; 0.02</b> )  |
| <i>Sleep efficiency</i>                          |                   |                                            |                 |                                          |                                                                                                                                                 |

| Author, Year<br>Synthesis type             | AMSTAR<br>rating  | Intervention and sample<br>size                                              | # of<br>studies | Measurement<br>method                                           | Pooled Estimates (MA) or<br>Narrative Results (from SR with no MA)                                                                                                                                                                                                                                                                                                                                         |
|--------------------------------------------|-------------------|------------------------------------------------------------------------------|-----------------|-----------------------------------------------------------------|------------------------------------------------------------------------------------------------------------------------------------------------------------------------------------------------------------------------------------------------------------------------------------------------------------------------------------------------------------------------------------------------------------|
| Sateia, 2017<br>Meta-analysis              | Critically<br>Low | Zolpidem: 111<br>Placebo: 115                                                | 4               | polysomnography                                                 | Mean difference[95% CI]:<br><b>6.12 [4.39, 7.85]</b> I-squared: 35%                                                                                                                                                                                                                                                                                                                                        |
| Swainston<br>Harrison, 2005                | Critically<br>Low | Zolpidem<br>Placebo<br>Total sample: 69                                      | 1               | NR                                                              | Change in outcome (p-value):<br>-3 vs +5 min (p=NS)                                                                                                                                                                                                                                                                                                                                                        |
| Systematic Review                          | Critically<br>Low | Zolpidem<br>Triazolam<br>Total sample: 86                                    | 2               | NR                                                              | Change in outcome (p-value):<br><b>+10 vs -6 min (p&lt;0.01)</b><br>-3 vs -15 min (p=NS)                                                                                                                                                                                                                                                                                                                   |
| <i>Health-related quality of life</i>      |                   |                                                                              |                 |                                                                 |                                                                                                                                                                                                                                                                                                                                                                                                            |
| Ishak, 2012<br>Systematic Review           | Low               | Zopiclone<br>Placebo<br>Total sample: 1006                                   | 2               | 23-item<br>questionnaire<br>developed by sleep<br>experts; QOLI | Contradicting evidence between both studies. No differences<br>found in QoL between subjects treated with zopiclone and<br>placebo                                                                                                                                                                                                                                                                         |
|                                            | Low               | Zolpidem (5 nights/week)<br>or Zolpidem (nightly)<br>Total sample: 789       | 1               | SF-36                                                           | Both groups demonstrated <b>improvement</b> with treatment<br><b>(p=0.005)</b> . The continuous group demonstrated greater<br>increase in mean MOS than the discontinuous group.                                                                                                                                                                                                                           |
| <i>Hangover/morning sedation</i>           |                   |                                                                              |                 |                                                                 |                                                                                                                                                                                                                                                                                                                                                                                                            |
| Cimolai, 2007<br>Systematic Review         | Critically<br>Low | Zopiclone<br>Flurazepam<br>Placebo<br>Total sample: 24                       | 1               | NR                                                              | After 3 weeks of treatment, zopiclone has no effect on early<br>morning performance and free of residual sedative activity                                                                                                                                                                                                                                                                                 |
| <i>Addiction, dependence, or diversion</i> |                   |                                                                              |                 |                                                                 |                                                                                                                                                                                                                                                                                                                                                                                                            |
| Cimolai, 2007<br>Systematic Review         | Critically<br>Low | Zopiclone<br>No comparator (pre- post-<br>intervention)<br>Total sample: 119 | 3               | NR                                                              | One study found no carry over effect after 3 weeks of<br>treatment; the second one found that after 7-8 weeks of<br>treatment, return of sleep variables to pre-treatment baseline<br>after withdrawal, and 1 of 11 patients had marked rebound<br>insomnia and daytime anxiety for the first week off; and the<br>third study after 3 mos of treatment, found withdrawal effects<br>despite tapering dose |
|                                            |                   | Zopiclone<br>Triazolam<br>Total sample: 48                                   | 1               | NR                                                              | Worse psychomotor deterioration after triazolam than<br>zopiclone, 3 of 24 zopiclone patients felt agitated early after<br>withdrawal                                                                                                                                                                                                                                                                      |
|                                            |                   | Zopiclone<br>Zolpidem<br>Total sample: 248                                   | 1               | NR                                                              | After 2 weeks of treatment, zopiclone group had 15.4% with<br>rebound insomnia                                                                                                                                                                                                                                                                                                                             |

| Author, Year<br>Synthesis type | AMSTAR<br>rating | Intervention and sample<br>size                       | # of<br>studies | Measurement<br>method | Pooled Estimates (MA) or<br>Narrative Results (from SR with no MA)                                                             |
|--------------------------------|------------------|-------------------------------------------------------|-----------------|-----------------------|--------------------------------------------------------------------------------------------------------------------------------|
|                                |                  | Zopiclone<br>Temazepam<br>Placebo<br>Total sample: 35 | 2               | NR                    | No psychomotor performance deterioration after 2 weeks of treatment; no rebound insomnia or anxiety after 3 weeks of treatment |

\* bolded results indicate statistical significance as reported by review

**Table E3. Suvorexant**

| Author, Year<br>Synthesis type     | AMSTAR<br>rating  | Intervention and sample<br>size               | # of<br>studies | Measurement<br>method | Pooled Estimates (MA) or<br>Narrative Results (from SR with no MA)                                                                                                                                                                                                                                           |
|------------------------------------|-------------------|-----------------------------------------------|-----------------|-----------------------|--------------------------------------------------------------------------------------------------------------------------------------------------------------------------------------------------------------------------------------------------------------------------------------------------------------|
| <i>Sleep onset latency</i>         |                   |                                               |                 |                       |                                                                                                                                                                                                                                                                                                              |
| Brasure, 2015<br>Meta-analysis     | High              | Suvorexant: 425<br>Placebo: 664               | 2               | subjective report     | Mean change [95% CI]:<br><b>-5.97 [-10.01, -1.92]</b> I-squared: 0%                                                                                                                                                                                                                                          |
| Kishi, 2015<br>Meta-analysis       | Moderate          | Suvorexant: 936<br>Placebo: 953               | 3               | sleep diary           | Mean difference [95% CI]:<br><b>-7.62 [-11.03, -4.21]</b> I-squared: 0%                                                                                                                                                                                                                                      |
|                                    |                   | Suvorexant: 349<br>Placebo: 659               | 3               | polysomnography       | Mean difference [95% CI]:<br><b>-10.82 [-16.72, -4.93]</b> I-squared: 35%                                                                                                                                                                                                                                    |
| Kuriyama, 2017<br>Meta-analysis    | Moderate          | Suvorexant: NR<br>Placebo: NR                 | 3               | sleep diary, PSG      | Mean difference [95% CI]:<br><b>-9.45 [-13.26, -5.65]</b> I-squared: 13.3%                                                                                                                                                                                                                                   |
|                                    |                   | Suvorexant: NR<br>Placebo: NR                 | 3               | polysomnography       | Mean difference [95% CI]:<br>-6.39 [-12.85, 0.07] I-squared: 67.1%                                                                                                                                                                                                                                           |
| Citrome, 2014<br>Systematic Review | Critically<br>Low | Suvorexant; 15; 20 mg:<br>425<br>Placebo: 688 | 2               | sleep diary           | Change in outcome [least squares mean difference (p-value)]:<br><b>-5.9 minutes (p&lt;0.01)</b><br>Proportion of respondents with >15% improvement:<br>69.9% v 66%; NNT: 26 (p=NS)<br>Suvorexant was <b>superior to placebo</b> for sleep latency both<br>through patient-assessed and polysomnography means |
|                                    |                   | Suvorexant; 15; 20 mg:<br>343<br>Placebo: 585 | 2               | polysomnography       | Change in outcome [least squares mean difference (p-value)]:<br>-4.6 minutes (p=NS)                                                                                                                                                                                                                          |
|                                    |                   | Suvorexant; 30; 40 mg:<br>688<br>Placebo: 664 | 2               | sleep diary           | Change in outcome [least squares mean difference (p-value)]:<br><b>-10.8 minutes (p&lt;0.001)</b><br>Proportion of respondents with >15% improvement:<br>76.5% v 66%; NNT 10 (95% CI 7 to 18)                                                                                                                |
|                                    |                   | Suvorexant; 30; 40 mg:<br>590<br>Placebo: 585 | 2               | polysomnography       | Change in outcome [least squares mean difference (p-value)]:<br><b>-6.4 minutes (p&lt;0.01)</b>                                                                                                                                                                                                              |



*Total sleep time*

|                                    |                   |                                                |   |                   |                                                                                                                                                                                                                                                                                                                                          |
|------------------------------------|-------------------|------------------------------------------------|---|-------------------|------------------------------------------------------------------------------------------------------------------------------------------------------------------------------------------------------------------------------------------------------------------------------------------------------------------------------------------|
| Kishi, 2015<br>Meta-analysis       | Moderate          | Suvorexant: 936<br>Placebo: 953                | 3 | sleep diary       | Mean difference [95% CI]:<br><b>-20.16 min [-25.01, -15.30]</b> I-squared: 0%                                                                                                                                                                                                                                                            |
| Kuriyama, 2017<br>Meta-analysis    | Moderate          | Suvorexant: NR<br>Placebo: NR                  | 3 | sleep diary, PSG  | Mean difference [95% CI]:<br><b>18.55 min [12.52, 24.58]</b> I-squared: 0%                                                                                                                                                                                                                                                               |
| Brasure, 2015<br>Meta-analysis     | High              | Suvorexant: 425<br>Placebo: 664                | 2 | subjective report | Mean change [95% CI]:<br><b>15.97 min [4.73, 27.22]</b> I-squared: 63%                                                                                                                                                                                                                                                                   |
| Citrome, 2014<br>Systematic Review | Critically<br>Low | Suvorexant<br>(15, 20 mg): 425<br>Placebo: 664 | 2 | sleep diary       | Change in outcome [least squares mean difference (p-value)]:<br><b>16 minutes (p&lt;0.001)</b><br>Proportion of respondents with >15% increase:<br>50.1% v 41.9%; NNT 13 (95% CI 17 to 46)<br>Suvorexant was also <b>superior to placebo</b> for sleep<br>maintenance, as assessed subjectively by patient-estimated<br>total sleep time |
|                                    |                   | Suvorexant<br>(30, 40 mg): 688<br>Placebo: 664 | 2 | sleep diary       | Change in outcome: [least squares mean difference (p-value)]:<br><b>22.1 minutes (p&lt;0.0001)</b><br>Proportion of respondents with >15% increase:<br>54.7% v 41.9%; NNT 8 (95% CI 6 to 14)                                                                                                                                             |

*Wake after sleep onset*

|                                    |                   |                                                |   |                 |                                                                                                                                                                                                 |
|------------------------------------|-------------------|------------------------------------------------|---|-----------------|-------------------------------------------------------------------------------------------------------------------------------------------------------------------------------------------------|
| Kishi, 2015<br>Meta-analysis       | Moderate          | Suvorexant: 955<br>Placebo: 960                | 3 | sleep diary     | Mean difference [95% CI]:<br><b>-7.75 [-10.87, -4.62]</b> I-squared: 0%                                                                                                                         |
|                                    |                   | Suvorexant: 317<br>Placebo: 542                | 2 | polysomnography | Mean difference [95% CI]:<br><b>-25.32 [-31.52, -19.39]</b> I-squared: 0%                                                                                                                       |
| Kuriyama, 2017<br>Meta-analysis    | Moderate          | Suvorexant: NR<br>Placebo: NR                  | 3 | sleep diary     | Mean difference [95% CI]:<br><b>-7.51 [-12.46, -2.56]</b> I-squared: 0%                                                                                                                         |
|                                    |                   | Suvorexant: NR<br>Placebo: NR                  | 3 | polysomnography | Mean difference [95% CI]:<br><b>-24.19 [-33.81, -14.58]</b> I-squared: 69.7%                                                                                                                    |
| Citrome, 2014<br>Systematic Review | Critically<br>Low | Suvorexant<br>(15, 20 mg): 425<br>Placebo: 660 | 2 | polysomnography | Change in outcome [least squares mean difference (p-value)]:<br><b>-4.7 minutes (p&lt;0.001)</b><br>Proportion of respondents with >15% improvement:<br>75.8% v 69.4%; NNT 16 (95% CI 9 to 102) |
|                                    |                   | Suvorexant<br>(15, 20 mg): 343<br>Placebo: 585 | 2 | polysomnography | Change in outcome: [least squares mean difference (p-value)]:<br><b>-23.1 minutes (p&lt;0.001)</b>                                                                                              |
|                                    |                   | Suvorexant<br>(30, 40 mg): 683<br>Placebo: 660 | 2 | sleep diary     | Change in outcome [least squares mean difference (p-value)]:<br><b>-7.8 minutes (p&lt;0.001)</b><br>Proportion of respondents with >15% improvement:<br>77.5% v 69.4%; NNT 13 (95% CI 8 to 30)  |

|                                         |                   |                                                |   |                                                |                                                                                                   |
|-----------------------------------------|-------------------|------------------------------------------------|---|------------------------------------------------|---------------------------------------------------------------------------------------------------|
|                                         |                   | Suvorexant<br>(30, 40 mg): 590<br>Placebo: 585 | 2 | polysomnography                                | Change in outcome: [least squares mean difference (p-value):<br><b>-25.9 minutes (p&lt;0.001)</b> |
| <i>Sleep quality</i>                    |                   |                                                |   |                                                |                                                                                                   |
| Kishi, 2015<br>Meta-analysis            | Moderate          | Suvorexant: 955<br>Placebo: 960                | 2 | Sleep diary; 4-<br>point scale                 | Mean difference [95% CI]:<br><b>-0.17 [-0.25, -0.09]</b> I-squared: 0%                            |
| <i>Insomnia severity index</i>          |                   |                                                |   |                                                |                                                                                                   |
| Kishi, 2015<br>Meta-analysis            | Moderate          | Suvorexant: 947<br>Placebo: 952                | 3 | ISI                                            | Mean difference [95% CI]:<br><b>-1.35 [-1.78, -0.93]</b> I-squared: 0%                            |
| Kuriyama, 2017<br>Meta-analysis         | Moderate          | Suvorexant: NR<br>Placebo: NR                  | 3 | ISI                                            | Mean difference [95% CI]:<br><b>-1.42 [-1.85, -0.98]</b> I-squared: 0%                            |
| Citrome, 2014<br>Systematic Review      | Critically<br>Low | Suvorexant<br>(15, 20 mg): 411<br>Placebo: 638 | 2 | ISI                                            | Proportion of respondents with >6 point improvement:<br>55.5% v 42.2%; NNT 8 (95% CI 6 to 14)     |
|                                         |                   | Suvorexant<br>(30, 40 mg): 656<br>Placebo: 638 | 2 | ISI                                            | Proportion of respondents with >6 point improvement:<br>54.9% v 42.2%; NNT 8 (95% CI 6 to 14)     |
| <i>Hangover/morning sedation</i>        |                   |                                                |   |                                                |                                                                                                   |
| Kishi, 2015<br>Meta-analysis            | Moderate          | Suvorexant: 1784<br>Placebo: 1025              | 3 | NR                                             | Risk ratio [95% CI]:<br><b>3.34 [1.08, 10.32]</b> I-squared: 0%                                   |
| Kuriyama, 2017<br>Meta-analysis         | Moderate          | Suvorexant: 2027<br>Placebo: 1274              | 3 | "excessive daytime<br>sleepiness"              | Relative risk [95% CI]:<br><b>3.05 [1.10, 8.48]</b> I-squared: 0%                                 |
| <i>Accidental Injury</i>                |                   |                                                |   |                                                |                                                                                                   |
| Kishi, 2015<br>Meta-analysis            | Moderate          | Suvorexant: 1784<br>Placebo: 1025              | 3 | "Motor vehicle<br>accidents/violation<br>s"    | Risk ratio [95% CI]:<br><b>1.16 [0.52, 2.60]</b> I-squared: 14%                                   |
| Kuriyama, 2017<br>Meta-analysis         | Moderate          | Suvorexant: 1784<br>Placebo: 1025              | 3 | "Falls"                                        | Relative risk [95% CI]:<br><b>0.84 [0.44, 1.62]</b> I-squared: 0%                                 |
|                                         |                   | Suvorexant: 1784<br>Placebo: 1025              | 3 | "Motor vehicle<br>accident/violation"          | Relative risk [95% CI]:<br><b>1.16 [0.39, 3.40]</b> I-squared: 50.2%                              |
| <i>Addiction, dependence, diversion</i> |                   |                                                |   |                                                |                                                                                                   |
| Kishi, 2015<br>Meta-analysis            | Moderate          | Suvorexant: 1784<br>Placebo: 1025              | 3 | "events suggesting<br>drug abuse<br>potential" | Risk ratio [95% CI]:<br><b>1.05 [0.67, 1.65]</b> I-squared: 0%                                    |
| Kuriyama, 2017<br>Meta-analysis         | Moderate          | Suvorexant: 1784<br>Placebo: 1025              | 3 | "Potential drug<br>abuse"                      | Relative risk [95% CI]:<br><b>1.05 [0.66, 1.65]</b> I-squared: 0%                                 |

**Table E4. Antidepressants**

| Author, Year<br>Synthesis type          | AMSTAR<br>rating  | Intervention and sample size                         | # of<br>studies | Measurement<br>method                                      | Pooled Estimates (MA) or<br>Narrative Results (from SR with no MA)                                                                                                                                                                                                                                                                                                                         |
|-----------------------------------------|-------------------|------------------------------------------------------|-----------------|------------------------------------------------------------|--------------------------------------------------------------------------------------------------------------------------------------------------------------------------------------------------------------------------------------------------------------------------------------------------------------------------------------------------------------------------------------------|
| <i>Sleep onset latency</i>              |                   |                                                      |                 |                                                            |                                                                                                                                                                                                                                                                                                                                                                                            |
| Buscemi, 2005<br>Meta-analysis          | High              | Doxepin 25mg: 40<br>Placebo: 40                      | 3               | sleep diary,<br>polysomnography                            | Mean difference [95% CI]:<br><b>-6.65 [-10.68, -2.63]</b> I-squared: 49.3%                                                                                                                                                                                                                                                                                                                 |
| Sateia, 2017<br>Meta-analysis           | Critically<br>Low | Doxepin 3mg: 282<br>Placebo: 276                     | 4               | polysomnography                                            | Mean difference [95% CI]:<br>-2.3 [-6.22, 1.62] I-squared: 0%                                                                                                                                                                                                                                                                                                                              |
|                                         |                   | Doxepin 3mg: 148<br>Placebo: 143                     | 2               | subjective measure                                         | Mean difference [95% CI]:<br>-9.35 [-21.89, 3.19] I-squared: 55%                                                                                                                                                                                                                                                                                                                           |
|                                         |                   | Doxepin 6mg: 209<br>Placebo: 206                     | 3               | polysomnography                                            | Mean difference [95% CI]:<br><b>-5.29 [-9.25, -1.34]</b> I-squared: 0%                                                                                                                                                                                                                                                                                                                     |
| Yuan, 2010<br>Meta-analysis             | Low               | Doxepin 1mg: 140<br>Placebo: 139                     | 2               | NR                                                         | Mean difference [95% CI]:<br>-0.85 [-5.82, 4.13] I-squared: NR                                                                                                                                                                                                                                                                                                                             |
|                                         |                   | Doxepin 3mg: 140<br>Placebo: 139                     | 2               | NR                                                         | Mean difference [95% CI]:<br>0.37 [-0.66, 1.40] I-squared: NR                                                                                                                                                                                                                                                                                                                              |
|                                         |                   | Doxepin 6mg: 141<br>Placebo: 139                     | 2               | NR                                                         | Mean difference [95% CI]:<br>0.37 [-0.66 to 1.40] I-squared: NR                                                                                                                                                                                                                                                                                                                            |
|                                         |                   | Doxepin 25mg: 30<br>Placebo: 30                      | 2               | NR                                                         | Mean difference [95% CI]:<br><b>-8.69 [-13.72 to -3.67]</b> I-squared: NR                                                                                                                                                                                                                                                                                                                  |
| Buscemi, 2005<br>Meta-analysis          | High              | Trazodone (50mg, 150-<br>250mg): 100<br>Placebo: 108 | 2               | sleep diary,<br>polysomnography                            | Mean difference [95% CI]:<br><b>-12.21 [-22.26, -2.15]</b> I-squared: 0%                                                                                                                                                                                                                                                                                                                   |
| Mayers, 2005<br>Systematic Review       | Critically<br>Low | Doxepin<br>Placebo<br>Total sample: 10               | 1               | NR                                                         | Doxepin <b>significantly improved</b> sleep latency compared to placebo (p-value not reported)                                                                                                                                                                                                                                                                                             |
| Vande Griend, 2012<br>Systematic Review | Critically<br>Low | Doxepin: NR<br>Placebo: NR                           | 6               | polysomnography<br>questionnaire<br>(7-point Likert scale) | Mixed results: polysomnography and questionnaire data showed <b>significant improvement</b> compared to placebo in some trials ( <b>p&lt;0.05</b> ); non-significant change found in other trials                                                                                                                                                                                          |
| Yeung, 2015<br>Systematic Review        | Moderate          | Doxepin: NR<br>Placebo: NR                           | NR              | self-report                                                | Adults <65 y: 3 mg doxepin had negative impact on sleep latency in short term (1-2 nights) results, 6 mg doxepin had positive impact on sleep latency in the short term (1-2 nights)<br>Adults >65y: 3 mg doxepin had negative impact on sleep-latency in both short- and long-term (4 weeks) treatment; 6 mg doxepin had positive results at short-term but negative results at long-term |

|                                      |                |                                                                |    |                                   |                                                                                                                                                                                                             |
|--------------------------------------|----------------|----------------------------------------------------------------|----|-----------------------------------|-------------------------------------------------------------------------------------------------------------------------------------------------------------------------------------------------------------|
|                                      |                |                                                                |    |                                   | Adults <65y: 3 and 6 mg had mixed results in short-term and negative results in long-term                                                                                                                   |
|                                      |                |                                                                | NR | polysomnography                   | Adults >65y: 3 mg doxepin had mixed results in short term and negative results in long-term; 6 mg doxepin had negative results in short term, no assessment of long-term effect                             |
| Mayers, 2005 Systematic Review       | Critically Low | Trazodone<br>Placebo<br>Total sample: 323                      | 2  | NR                                | <b>Significant decrease</b> in sleep latency for one trial ( <b>p&lt;0.05</b> ), almost significant change in the other (p=0.06)                                                                            |
|                                      |                | Trazodone<br>Placebo; unspecified control<br>Total sample: 306 | 1  | self-reported                     | Relative to placebo, patients reported <b>significant improvement</b> during week 1 ( <b>p&lt;0.02</b> ); during week 2, the trazodone group did not differ significantly from the placebo group.           |
| Mendelson, 2005 Systematic Review    | Critically Low | Trazodone<br>placebo; unspecified control<br>Total sample: 29  | 2  | polysomnography                   | No significant changes in sleep latency found between groups                                                                                                                                                |
|                                      |                | Trazodone: 39<br>No comparator (pre- post-intervention)        | 5  | polysomnography                   | Mixed results: 3 trials found <b>significant improvement</b> compared to baseline ( <b>p&lt;0.05</b> ); 2 trials found non-significant change                                                               |
| Vande Griend, 2012 Systematic Review | Critically Low | Trazodone: NR<br>Placebo: NR                                   | 3  | sleep diaries;<br>polysomnography | No significant difference found between groups                                                                                                                                                              |
| Mayers, 2005 Systematic Review       | Critically Low | Trazodone<br>Zolpidem<br>Total sample: 306                     | 1  | NR                                | Sleep latency was <b>significantly shorter</b> for the zolpidem v placebo group compared to trazodone v placebo group ( <b>p=0.037</b> )                                                                    |
| Mendelson, 2005 Systematic Review    | Critically Low | Trazodone<br>Zolpidem<br>Total sample: 306                     | 1  | self-reported                     | Sleep latency for zolpidem compared to placebo was <b>significantly shorter</b> than that for trazodone compared to placebo ( <b>p &lt;0.037</b> )                                                          |
| Vande Griend, 2012 Systematic Review | Critically Low | Trazodone<br>Zolpidem<br>Total sample: 306                     | 1  | daily questionnaire               | Sleep latency was <b>significantly shorter</b> for zolpidem compared to placebo ( <b>p&lt;0.005</b> ) but not for trazodone compared with placebo; no significant difference between zolpidem and trazodone |
| <i>Total sleep time</i>              |                |                                                                |    |                                   |                                                                                                                                                                                                             |
| Brasure, 2015 Meta-analysis          | High           | Doxepin: 289<br>Placebo: 205                                   | 2  | subjective report, in minutes     | Mean change [95% CI]:<br><b>23.85 [12.04, 35.65]</b> I-squared: 0%                                                                                                                                          |
| Liu, 2017 Meta-analysis              | Critically Low | Doxepin: 743<br>Placebo: 733                                   | 7  | polysomnography                   | Standardized mean difference [95% CI]:<br><b>0.61 [0.50, 0.71]</b> I-squared: 15%                                                                                                                           |

|                                         |                   |                                        |    |                                                         |                                                                                                                                                                                                                                                                                                                                                                  |
|-----------------------------------------|-------------------|----------------------------------------|----|---------------------------------------------------------|------------------------------------------------------------------------------------------------------------------------------------------------------------------------------------------------------------------------------------------------------------------------------------------------------------------------------------------------------------------|
| Sateia, 2017<br>Meta-analysis           | Critically<br>Low | Doxepin (3mg): 282<br>Placebo: 276     | 4  | polysomnography                                         | Mean difference [95% CI]:<br><b>26.14 [18.49, 33.79]</b> I-squared: 0%                                                                                                                                                                                                                                                                                           |
|                                         |                   | Doxepin (3mg): 148<br>Placebo: 143     | 2  | subjective measure                                      | Mean difference [95% CI]:<br><b>43.57 [5.16, 81.98]</b> I-squared: 82%                                                                                                                                                                                                                                                                                           |
|                                         |                   | Doxepin (6mg): 209<br>Placebo: 206     | 3  | PSG                                                     | Mean difference [95% CI]:<br><b>32.27 [24.24, 40.30]</b> I-squared: 0%                                                                                                                                                                                                                                                                                           |
|                                         |                   | Doxepin (6mg): 204<br>Placebo: 197     | 2  | subjective measure                                      | Mean difference [95% CI]:<br>18.84 [-1.65, 39.34] I-squared: 56%                                                                                                                                                                                                                                                                                                 |
| Yuan, 2010<br>Meta-analysis             | Low               | Doxepin (1mg): 140<br>Placebo: 139     | 2  | NR                                                      | Mean difference [95% CI]:<br><b>17.24 [7.43, 27.05]</b> I-squared: NR                                                                                                                                                                                                                                                                                            |
|                                         |                   | Doxepin (25mg): 30<br>Placebo: 30      | 2  | NR                                                      | Mean difference [95% CI]:<br><b>70.74 [42.61, 98.88]</b> I-squared: NR                                                                                                                                                                                                                                                                                           |
|                                         |                   | Doxepin (3mg): 140<br>Placebo: 139     | 2  | NR                                                      | Mean difference [95% CI]:<br><b>27.95 [17.99, 37.90]</b> I-squared: NR                                                                                                                                                                                                                                                                                           |
|                                         |                   | Doxepin (6mg): 141<br>Placebo: 139     | 2  | NR                                                      | Mean difference [95% CI]:<br><b>33.78 [24.44, 43.11]</b> I-squared: NR                                                                                                                                                                                                                                                                                           |
| Mayers, 2005<br>Systematic Review       | Critically<br>Low | Doxepin<br>Placebo<br>Total sample: 10 | 1  | NR                                                      | Doxepin <b>significantly improved</b> total sleep time compared to placebo (p-value not reported)                                                                                                                                                                                                                                                                |
| Vande Griend, 2012<br>Systematic Review | Critically<br>Low | Doxepin: NR<br>Placebo: NR             | 7  | polysomnography<br>questionnaire<br>(Likert-type scale) | Doxepin increased total sleep time by 25-51 minutes across the trials; 6 of the found a <b>significant difference</b> compared to placebo ( <b>p&lt;0.05</b> )                                                                                                                                                                                                   |
| Yeung, 2015<br>Systematic Review        | Moderate          | Doxepin: NR<br>Placebo: NR             | NR | self-report                                             | Adults <65y: mixed results for 3 mg doxepin over 1-2 nights, a single trial showed improvement at 4 weeks; multiple trials showed positive improvement for 6 mg doxepin over 1-2 nights, a single trial showed improvement at 4 weeks<br>Adults >65y: 3mg and 6mg doxepin showed positive results over 1-2 nights; results were maintained for 3 mg doxepin only |
|                                         |                   |                                        | NR | polysomnography                                         | Adults <65y: multiple trials found positive results for 3mg and 6mg doxepin over 1-2 nights, the effect was maintained at 4 weeks for 6mg doxepin only<br>Adults >65y: positive results for 3mg and 6mg doxepin over 1-2 nights, the effect was maintained at 4 weeks for 3 mg doxepin; no long-term data on 6mg doxepin was available                           |

|                                         |                   |                                                                         |   |                                  |                                                                                                                                                                                         |
|-----------------------------------------|-------------------|-------------------------------------------------------------------------|---|----------------------------------|-----------------------------------------------------------------------------------------------------------------------------------------------------------------------------------------|
| Mayers, 2005<br>Systematic Review       | Critically<br>Low | Trazodone<br>Placebo<br>Total sample: 323                               | 2 | NR                               | Both trials found a <b>significant increase</b> in total sleep time compared to placebo ( <b>p&lt;0.05; p=0.003</b> )                                                                   |
|                                         |                   | Trazodone (50 v 75 v 100mg):<br>75<br>No comparator<br>(multiple doses) | 1 | self-rated                       | Total sleep time was <b>significantly longer</b> with 50mg and 75mg doses compared to 100mg (p-value NR); no significant difference was found between 50mg and 75 mg doses (p-value NR) |
| Mendelson, 2005<br>Systematic Review    | Critically<br>Low | Trazodone<br>placebo; unspecified control<br>Total sample: 63           | 3 | polysomnography                  | Mixed results: 2 trials found <b>significant improvement</b> in total sleep time compared to placebo ( <b>p&lt;0.05</b> );<br>1 trial found no significant change between groups        |
|                                         |                   | Trazodone: 39<br>No comparator (pre- post-<br>intervention)             | 5 | polysomnography                  | Mixed results: 2 trials found <b>significant increase</b> in total sleep time compared to baseline ( <b>p&lt;0.05</b> );<br>3 trials found no significant change from baseline          |
| Vande Griend, 2012<br>Systematic Review | Critically<br>Low | Trazodone: NR<br>Placebo: NR                                            | 2 | sleep diaries<br>polysomnography | No significant differences between groups                                                                                                                                               |
| Mayers, 2005<br>Systematic Review       | Critically<br>Low | Trazodone<br>Zolpidem<br>Total sample: 306                              | 1 | NR                               | No significant differences found between zolpidem and trazodone                                                                                                                         |
| Vande Griend, 2012<br>Systematic Review | Critically<br>Low | Trazodone<br>Zolpidem<br>Total sample: 306                              | 1 | daily questionnaire              | No significant differences found between zolpidem and trazodone                                                                                                                         |
| <i>Wake after sleep onset</i>           |                   |                                                                         |   |                                  |                                                                                                                                                                                         |
| Sateia, 2017<br>Meta-analysis           | Critically<br>Low | Doxepin (3mg): 282<br>Placebo: 276                                      | 4 | polysomnography                  | Mean difference [95% CI]:<br><b>-22.17 [-29.62, -14.72]</b> I-squared: 23%                                                                                                              |
|                                         |                   | Doxepin (6mg): 209<br>Placebo: 206                                      | 3 | polysomnography                  | Mean difference [95% CI]:<br><b>-23.4 [-30.34, -16.46]</b> I-squared: 0%                                                                                                                |
|                                         |                   | Doxepin (6mg): 204<br>Placebo: 197                                      | 2 | Subjective measure               | Mean difference [95% CI]:<br><b>-14.39 [-24.86, -3.93]</b><br>I-squared: 0%                                                                                                             |
| Yuan, 2010<br>Meta-analysis             | Low               | Doxepin (1mg): 140<br>Placebo: 139                                      | 2 | NR                               | Mean difference [95% CI]:<br>-3.57 [-7.46, 0.32] I-squared: NR                                                                                                                          |
|                                         |                   | Doxepin (25mg): 30<br>Placebo: 30                                       | 2 | NR                               | Mean difference [95% CI]:<br><b>-10.23 [-14.82, -5.64]</b> I-squared: NR                                                                                                                |
|                                         |                   | Doxepin (3mg): 140<br>Placebo: 139                                      | 2 | NR                               | Mean difference [95% CI]:<br><b>-5.71 [-9.39, -2.02]</b> I-squared: NR                                                                                                                  |
|                                         |                   | Doxepin (6mg): 141<br>Placebo: 139                                      | 2 | NR                               | Mean difference [95% CI]:<br><b>-7.36 [-10.69, -4.03]</b> I-squared: NR                                                                                                                 |

|                                         |                   |                                                                |    |                                                         |                                                                                                                                                                                                                                                                                      |
|-----------------------------------------|-------------------|----------------------------------------------------------------|----|---------------------------------------------------------|--------------------------------------------------------------------------------------------------------------------------------------------------------------------------------------------------------------------------------------------------------------------------------------|
| Vande Griend, 2012<br>Systematic Review | Critically<br>Low | Doxepin: NR<br>Placebo: NR                                     | 7  | polysomnography<br>questionnaire<br>(Likert-type scale) | Doxepin reduced WASO by 5-20 minutes across the trials; 6 out of 7 trials found a <b>significant difference</b> compared to placebo ( <b>p&lt;0.05</b> )                                                                                                                             |
| Yeung, 2015<br>Systematic Review        | Moderate          | Doxepin: NR<br>Placebo: NR                                     | NR | self-report                                             | Adults <65y: mixed results for 3mg and 6mg doxepin over 1-2 nights, 3mg and 6mg doxepin showed positive results at 4 weeks<br>Adults >65y: positive results for 3mg doxepin over 1-2 nights, negative results for 6mg doxepin over 1-2 nights and at 4 weeks                         |
|                                         |                   |                                                                | NR | polysomnography                                         | Adults <65y: multiple trials with positive results for 3mg and 6mg doxepin over 1-2 nights, results were maintained at 4 weeks<br>Adults >65y: positive results for 3mg doxepin over 1-2 nights and at 4 weeks; positive results for 6mg doxepin over 1-2 nights, no data at 4 weeks |
| Kolla, 2011<br>Systematic Review        | Critically<br>Low | Trazodone<br>Placebo<br>Total sample: 16                       | 1  | polysomnography                                         | Improved WASO was observed in trazodone participants compared to placebo                                                                                                                                                                                                             |
| Mayers, 2005<br>Systematic Review       | Critically<br>Low | Trazodone<br>Placebo<br>Total sample: 306                      | 1  | NR                                                      | <b>Significant improvement</b> in WASO compared to placebo ( <b>p=0.04</b> )                                                                                                                                                                                                         |
| Mendelson, 2005<br>Systematic review    | Critically<br>Low | Trazodone<br>Placebo; unspecified control<br>Total sample: 306 | 1  | self-reported                                           | Relative to placebo, patients reported <b>significant improvement</b> during week 1 ( <b>p&lt;0.02</b> ); during week 2, the trazodone group did not differ significantly from the placebo group.                                                                                    |
|                                         |                   | Trazodone: 15<br>No comparator (pre- post-intervention)        | 2  | polysomnography                                         | Mixed result:<br>1 trial found <b>significant improvement</b> ( <b>p&lt;0.05</b> );<br>1 trial found no significant change from baseline                                                                                                                                             |
| Vande Griend, 2012<br>Systematic Review | Critically<br>Low | Trazodone: NR<br>Placebo: NR                                   | 2  | polysomnography                                         | Mixed result:<br>1 trial found a <b>significant difference</b> compared to placebo ( <b>p&lt;0.05</b> ),<br>1 trial found no difference between groups                                                                                                                               |
| Mayers, 2005<br>Systematic Review       | Critically<br>Low | Trazodone<br>Zolpidem<br>Total sample: 306                     | 1  | NR                                                      | No significant differences found between zolpidem and trazodone                                                                                                                                                                                                                      |
| Vande Griend, 2012<br>Systematic Review | Critically<br>Low | Trazodone<br>Zolpidem<br>Total sample: 306                     | 1  | daily questionnaire                                     | No significant differences found between zolpidem and trazodone                                                                                                                                                                                                                      |

*Sleep Quality*

|                                      |                   |                                                                |   |                                                                                                                |                                                                                                                                                                                                                                                                                                                                                                                                                                          |
|--------------------------------------|-------------------|----------------------------------------------------------------|---|----------------------------------------------------------------------------------------------------------------|------------------------------------------------------------------------------------------------------------------------------------------------------------------------------------------------------------------------------------------------------------------------------------------------------------------------------------------------------------------------------------------------------------------------------------------|
| Sateia, 2017<br>Meta-analysis        | Critically<br>Low | Doxepin (3mg): 148<br>Placebo: 143                             | 2 | subjective measure                                                                                             | Standardized mean difference [95% CI]:<br><b>0.57 [0.26 to 0.88]</b> I-squared: 43%                                                                                                                                                                                                                                                                                                                                                      |
|                                      |                   | Doxepin (6mg): 204<br>Placebo: 200                             | 2 | subjective measure                                                                                             | Standardized mean difference [95% CI]:<br><b>0.28 [0.06 to 0.49]</b> I-squared: 15%                                                                                                                                                                                                                                                                                                                                                      |
| Mayers, 2005<br>Systematic Review    | Critically<br>Low | Doxepin<br>Placebo<br>Total sample: 57                         | 2 | NR                                                                                                             | Doxepin <b>significantly improved</b> sleep quality relative to placebo ( <b>p&lt;0.001</b> )                                                                                                                                                                                                                                                                                                                                            |
| Kolla, 2011<br>Systematic Review     | Critically<br>Low | Trazodone<br>placebo<br>Total sample: 173                      | 1 | Pittsburgh Sleep<br>Quality Index                                                                              | Sleep quality <b>improved significantly</b> in trazodone group during active treatment phase                                                                                                                                                                                                                                                                                                                                             |
| Mayers, 2005<br>Systematic Review    | Critically<br>Low | Trazodone<br>Placebo<br>Total sample: 323                      | 2 | NR; Pittsburgh Sleep<br>Quality Index                                                                          | Sleep quality <b>significantly improved</b> compared to placebo in one trial ( <b>p=0.003</b> ), and almost reached significance in the other (p=0.06) but <b>significantly higher proportion</b> of patients in this trial showed <b>improvement</b> on sleep quality compared to placebo ( <b>0.004</b> )                                                                                                                              |
| Mendelson, 2005<br>Systematic Review | Critically<br>Low | Trazodone<br>placebo; unspecified control<br>Total sample: 767 | 5 | self-reported (1);<br>Pittsburgh Sleep<br>Quality Index (1);<br>Leeds sleep<br>evaluation<br>questionnaire (3) | Relative to placebo, patients reported <b>significant improvement</b> during week 1 ( <b>p&lt;0.02</b> ); during week 2, the trazodone group did not differ significantly from the placebo group<br>3 trials reported <b>significant improvements</b> throughout the 6-week treatment period for "quality of sleep." <b>(p&lt;0.001)</b> ; Pittsburgh Sleep Quality Index improvements were similar for the placebo and trazodone groups |
|                                      |                   | Trazodone: 9<br>No comparator (pre- post-<br>intervention)     | 1 | visual analog scale                                                                                            | In the subjective ratings, sleep quality <b>improved significantly</b> during weeks 1 and 2 ( <b>p&lt;0.001</b> ) but not during week 3                                                                                                                                                                                                                                                                                                  |
| Mayers, 2005<br>Systematic Review    | Critically<br>Low | Trazodone<br>Zolpidem<br>Total sample: 306                     | 1 | NR                                                                                                             | No significant differences found between zolpidem and trazodone                                                                                                                                                                                                                                                                                                                                                                          |
| <i>Sleep Efficiency</i>              |                   |                                                                |   |                                                                                                                |                                                                                                                                                                                                                                                                                                                                                                                                                                          |
| Sateia, 2017<br>Meta-analysis        | Critically<br>Low | Doxepin (3mg): 214<br>Placebo: 209                             | 3 | polysomnography                                                                                                | Mean difference [95% CI]:<br><b>6.78 [4.50 to 9.07]</b> I-squared: 17%                                                                                                                                                                                                                                                                                                                                                                   |
|                                      |                   | Doxepin (6mg): 141<br>Placebo: 139                             | 2 | polysomnography                                                                                                | Mean difference [95% CI]:<br><b>7.06 [5.12 to 9.01]</b> I-squared: 0%                                                                                                                                                                                                                                                                                                                                                                    |
| Yuan, 2010<br>Meta-analysis          | Low               | Doxepin (1mg): 140<br>Placebo: 139                             | 2 | NR                                                                                                             | Mean difference [95% CI]:<br><b>3.59 [1.55 to 5.63]</b> I-squared: NR                                                                                                                                                                                                                                                                                                                                                                    |
|                                      |                   | Doxepin (25mg): 30<br>Placebo: 30                              | 2 | NR                                                                                                             | Mean difference [95% CI]:<br><b>12.58 [7.60, 17.56]</b> I-squared: NR                                                                                                                                                                                                                                                                                                                                                                    |



|                                         |                   |                                                               |   |                                                                    |                                                                                                                                                                                                                        |
|-----------------------------------------|-------------------|---------------------------------------------------------------|---|--------------------------------------------------------------------|------------------------------------------------------------------------------------------------------------------------------------------------------------------------------------------------------------------------|
|                                         |                   | Doxepin (3mg): 140<br>Placebo: 139                            | 2 | NR                                                                 | Mean difference [95% CI]:<br><b>5.82 [3.75 to 7.90]</b> I-squared: NR                                                                                                                                                  |
|                                         |                   | Doxepin (6mg): 141<br>Placebo: 139                            | 2 | NR                                                                 | Mean difference [95% CI]:<br><b>7.07 [5.12 to 9.01]</b> I-squared: NR                                                                                                                                                  |
| Mayers, 2005<br>Systematic Review       | Critically<br>Low | Doxepin<br>Placebo<br>Total sample: 47                        | 1 | NR                                                                 | Doxepin <b>significantly increased</b> sleep efficiency compared to placebo ( <b>p&lt;0.05</b> )                                                                                                                       |
| Vande Griend, 2012<br>Systematic Review | Critically<br>Low | Doxepin: NR<br>Placebo: NR                                    | 6 | polysomnography<br>questionnaire<br>(7-point Likert type<br>scale) | Doxepin increased SE by 6-10% across the trials;<br><b>significant differences</b> were found compared to<br>placebo ( <b>p&lt;0.05</b> )                                                                              |
| Yeung, 2015<br>Systematic Review        | Moderate          | Doxepin: NR<br>Placebo: NR                                    | 1 | polysomnography                                                    | Sleep efficiency <b>significantly improved</b> compared to<br>placebo after 28 nights (p-value not reported)                                                                                                           |
| Mendelson, 2005<br>Systematic Review    | Critically<br>Low | Trazodone<br>placebo; unspecified control<br>Total sample: 56 | 3 | polysomnography                                                    | Mixed result:<br>2 trials found <b>significant improvements</b> in sleep<br>efficiency compared to placebo ( <b>p&lt;0.05</b> );<br>1 trial found no significant change compared to<br>placebo                         |
|                                         |                   | Trazodone: 20<br>No comparator (pre- post-<br>intervention)   | 3 | polysomnography                                                    | Mixed result:<br>1 trial found <b>significant improvements</b> in sleep<br>efficiency compared to baseline ( <b>p&lt;0.05</b> );<br>2 trials found no significant change from baseline                                 |
| Vande Griend, 2012<br>Systematic Review | Critically<br>Low | Trazodone: NR<br>Placebo: NR                                  | 2 | sleep diaries;<br>polysomnography                                  | Mixed result:<br>1 study found <b>significant difference</b> between groups<br>( <b>p&lt;0.05</b> , polysomnography data only); 1 study found<br>no difference between group (polysomnography and<br>sleep diary data) |
| <i>Insomnia Severity Index</i>          |                   |                                                               |   |                                                                    |                                                                                                                                                                                                                        |
| Brasure, 2015<br>Meta-analysis          | High              | Doxepin: 289<br>Placebo: 205                                  | 2 | ISI                                                                | Mean change [95% CI]:<br><b>-1.74 [-2.59 to -0.88]</b> I-squared: 0%                                                                                                                                                   |

**Table E5. Anti-psychotics**

| Author, Year<br>Synthesis type      | AMSTAR<br>rating  | Intervention and sample<br>size                                                  | # of<br>studies | Measurement method                                 | Pooled Estimates (MA) or<br>Narrative Results (from SR with no MA)                                                                                                                                     |
|-------------------------------------|-------------------|----------------------------------------------------------------------------------|-----------------|----------------------------------------------------|--------------------------------------------------------------------------------------------------------------------------------------------------------------------------------------------------------|
| <i>Sleep onset latency</i>          |                   |                                                                                  |                 |                                                    |                                                                                                                                                                                                        |
| Anderson, 2014<br>Systematic Review | Critically<br>Low | Quetiapine<br>No comparator (pre- post-<br>intervention)<br>Total sample: 70     | 2               | polysomnography;<br>Spiegel sleep<br>questionnaire | Change in outcome (p-value):<br>24.2 +/-19.0 minutes (p=NS);<br>Improvement in Spiegel sleep questionnaire score (p-<br>value not reported)                                                            |
|                                     |                   | Quetiapine<br>Placebo; no therapy<br>Total sample: 52                            | 2               | polysomnography or<br>actigraphy                   | Change in outcome (p-value):<br>66.5+/-51.2 v 47.4+/-30.4 minutes (p=NS);<br><b>15.6+/-18.1 minutes v 24.5+/-30.2 minutes (p&lt;0.05)</b>                                                              |
| Coe, 2014<br>Systematic Review      | Critically<br>Low | Quetiapine: 8<br>Placebo: 8                                                      | 1               | patient-recorded sleep<br>logs                     | Change in outcome (p-value):<br>-96.16 v -23.72 minutes (p=0.07)                                                                                                                                       |
| Wine, 2009<br>Systematic Review     | Critically<br>Low | Quetiapine: 32<br>No comparator (pre- post-<br>intervention)                     | 2               | NR                                                 | Change in outcome (p-value):<br>22±17 v 24±19 minutes (p=NS);<br><b>82±65 v 29±23 minutes (p&lt;0.05)</b><br>Significant reduction in sleep latency scores compared to<br>baseline with quetiapine use |
| <i>Total Sleep Time</i>             |                   |                                                                                  |                 |                                                    |                                                                                                                                                                                                        |
| Anderson, 2014<br>Systematic Review | Critically<br>Low | Quetiapine: 18<br>No comparator (pre- post-<br>intervention)                     | 1               | polysomnography                                    | Change in outcome:<br><b>395.6+/-62.3 (p&lt;0.05 compared to baseline)</b>                                                                                                                             |
|                                     |                   | Quetiapine<br>Placebo; no therapy<br>Total sample: 52                            | 2               | polysomnography<br>actigraphy                      | Change in outcome:<br>347.5+/-100.9 v 361.9+/-85.4 (p=NS);<br>432 +/-66 v 390+/-54 (p=NS)                                                                                                              |
| Coe, 2014<br>Systematic Review      | Critically<br>Low | Quetiapine: 8<br>Placebo: 8                                                      | 1               | patient-recorded sleep<br>logs                     | Change in outcome (p-value):<br>+124.92 v +72.24 minutes (p=0.193)                                                                                                                                     |
|                                     |                   | Quetiapine: 18<br>No comparator (pre- post-<br>intervention)                     | 1               | objective; from baseline<br>to week 6              | TST <b>significantly improved</b> from baseline compared to<br>week 6 ( <b>p=0.03</b> )                                                                                                                |
| Wine, 2009<br>Systematic Review     | Critically<br>Low | Quetiapine: 18<br>No comparator (pre- post-<br>intervention)                     | 1               | NR                                                 | Change in outcome (p-value):<br><b>396±62 to 358±61mins (p&lt;0.05)</b><br><b>Significant decrease</b> in TST vs baseline for quetiapine                                                               |
|                                     |                   | Quetiapine<br>Untreated control<br>(pre- post- intervention)<br>Total sample: 18 | 1               | NR                                                 | Change in outcome (p-value):<br><b>[pre-post] 240±60 to 360±120 min (p&lt;0.05);</b><br>Quetiapine <b>improved</b> total sleep time compared to<br>control                                             |
| <i>Sleep Quality</i>                |                   |                                                                                  |                 |                                                    |                                                                                                                                                                                                        |

|                                     |                   |                                                              |   |                                      |                                                                                                                                                                  |
|-------------------------------------|-------------------|--------------------------------------------------------------|---|--------------------------------------|------------------------------------------------------------------------------------------------------------------------------------------------------------------|
| Anderson, 2014<br>Systematic Review | Critically<br>Low | Quetiapine: 84<br>No comparator (pre- post-<br>intervention) | 3 | PSQI; Spiegel Sleep<br>Questionnaire | <b>Significant improvements</b> on PSQI global scores<br>( <b>p&lt;0.001</b> ); 75% improvement in global score for SSQ<br>(p-value not reported)                |
|                                     |                   | Quetiapine Placebo; no<br>therapy<br>Total sample: 78        | 3 | PSQI; actigraphy                     | <b>Significant improvement</b> in PSQI scores from baseline<br>and compared to placebo ( <b>p&lt;0.001</b> )                                                     |
| Coe, 2014<br>Systematic Review      | Critically<br>Low | Quetiapine: 18<br>No comparison                              | 1 | PSQI; sleep diary                    | Subjective parameters such as PSQI and sleep diaries also<br>showed <b>significant improvement</b> from baseline to weeks<br>2 and 6                             |
| Kolla, 2011<br>Systematic Review    | Critically<br>Low | Quetiapine: 28<br>No comparator (pre- post-<br>intervention) | 1 | HAM-D's sleep<br>question subset     | Middle and late insomnia was <b>significantly reduced</b> at 2<br>weeks, no other sleep data presented                                                           |
| Wine, 2009<br>Systematic Review     | Critically<br>Low | Quetiapine: 18<br>No comparator (pre- post-<br>intervention) | 1 | PSQI                                 | PSQI decreased total scores with use of quetiapine vs<br>baseline                                                                                                |
| <i>Sleep Satisfaction</i>           |                   |                                                              |   |                                      |                                                                                                                                                                  |
| Anderson, 2014<br>Systematic Review | Critically<br>Low | Quetiapine Placebo; no<br>therapy<br>Total sample: 25        | 1 | visual analogue scale                | Non-significant improvement based on visual analog<br>scale (p=0.505)                                                                                            |
| <i>Sleep Efficiency</i>             |                   |                                                              |   |                                      |                                                                                                                                                                  |
| Anderson, 2014<br>Systematic Review | Critically<br>Low | Quetiapine: 18<br>No comparator (pre- post-<br>intervention) | 1 | polysomnography                      | Change in outcome (p-value):<br><b>89.9+/-8.2 (p&lt;0.05)</b>                                                                                                    |
|                                     |                   | Quetiapine Placebo; no<br>therapy<br>Total sample: 27        | 1 | polysomnography or<br>actigraphy     | Change in outcome (p-value):<br><b>82.7+/-9.1 v 77.0+/-7.9 (p&lt;0.05)</b>                                                                                       |
| Coe, 2014<br>Systematic Review      | Critically<br>Low | Quetiapine: 18<br>No comparator (pre- post-<br>intervention) | 1 | Objective measure                    | Sleep efficiency <b>significantly improved</b> from baseline<br>compared to week 6 ( <b>p=0.02</b> )                                                             |
| Wine, 2009<br>Systematic Review     | Critically<br>Low | Quetiapine: 18<br>No comparator (pre- post-<br>intervention) | 1 | NR                                   | Change in outcome (p-value):<br><b>83%±14%→90%±8% (p&lt;0.05)</b><br><b>Significant increase</b> in sleep efficiency with quetiapine<br>use compared to baseline |
| <i>Insomnia Severity Index</i>      |                   |                                                              |   |                                      |                                                                                                                                                                  |
| Anderson, 2014<br>Systematic Review | Critically<br>Low | Quetiapine: 6<br>No comparator (pre- post-<br>intervention)  | 1 | ISI                                  | In 5 of 6 patients, the ISI score moved from moderate<br>insomnia to absence of insomnia at week 1 and was<br>maintained                                         |
| <i>Hangover/Morning Sedation</i>    |                   |                                                              |   |                                      |                                                                                                                                                                  |

|                                     |                   |                                   |   |    |                                                                                                                                 |
|-------------------------------------|-------------------|-----------------------------------|---|----|---------------------------------------------------------------------------------------------------------------------------------|
| Anderson, 2014<br>Systematic Review | Critically<br>Low | Quetiapine Placebo; no<br>therapy | 2 | NR | Daytime sedation was <b>significantly more common</b> in the<br>quetiapine group<br>(compared to placebo, p-value not reported) |
|-------------------------------------|-------------------|-----------------------------------|---|----|---------------------------------------------------------------------------------------------------------------------------------|

**Table E6. Melatonin**

| Author, Year<br>Synthesis type        | AMSTAR<br>rating  | Intervention and<br>sample size           | # of<br>studies | Measurement method                              | Pooled Estimates (MA) or<br>Narrative Results (from SR with no MA)                                                                                                                                                                                                                                                                                                                                                           |
|---------------------------------------|-------------------|-------------------------------------------|-----------------|-------------------------------------------------|------------------------------------------------------------------------------------------------------------------------------------------------------------------------------------------------------------------------------------------------------------------------------------------------------------------------------------------------------------------------------------------------------------------------------|
| <i>Sleep onset latency</i>            |                   |                                           |                 |                                                 |                                                                                                                                                                                                                                                                                                                                                                                                                              |
| Buscemi, 2005<br>Meta-analysis        | High              | Melatonin: 103<br>Placebo: 103            | 8               | sleep diary<br>polysomnography                  | Mean difference [95% CI]:<br><b>-8.25 [-14.45, -2.04]</b> I-squared: 44.2%                                                                                                                                                                                                                                                                                                                                                   |
| Buscemi, 2004<br>Meta-analysis        | High              | Melatonin: 178<br>Placebo: 167            | 12              | NR                                              | Mean difference [95% CI]:<br><b>-10.66 [-17.61, -3.72]</b> I-squared: 81.5%                                                                                                                                                                                                                                                                                                                                                  |
| Ferracioli-Oda, 2013<br>Meta-analysis | Critically<br>Low | Melatonin: NR<br>Placebo: NR              | 8               | polysomnography or<br>actigraphy                | Mean difference [95% CI]:<br><b>5.5 [2.29, 7.81]</b> I-squared: NR                                                                                                                                                                                                                                                                                                                                                           |
| Lee, NA<br>Meta-analysis              | Critically<br>Low | Melatonin: NR<br>Placebo: NR              | 12              | sleep diary<br>polysomnography or<br>actigraphy | Mean difference [95% CI]:<br><b>-3.71 [-6.78, -0.63]</b> I-squared: 39%                                                                                                                                                                                                                                                                                                                                                      |
| Bellon, 2006<br>Systematic Review     | Critically<br>Low | Melatonin: NR<br>Placebo: NR              | 13              | subjective<br>polysomnography<br>actigraphy     | Adults: 3 studies <b>significant improvement (p&lt;0.05)</b> ;<br>1 study non-significant improvement; 1 study<br>improved subjectively and non-significant change on<br>polysomnography<br>Elderly: 2 studies non-significant improvement; 2<br>studies no change; 1 study <b>significant improvement<br/>(P&lt;0.05)</b><br>Schizophrenia, Dementia, and medically ill patients: 3<br>studies, non-significant improvement |
| Culpepper, 2015<br>Systematic Review  | Critically<br>Low | Melatonin<br>Placebo<br>Total sample: 772 | 3               | polysomnography<br>actigraphy sleep diary       | No significant difference between groups<br>(melatonin vs placebo)                                                                                                                                                                                                                                                                                                                                                           |
| Vural, 2014<br>Systematic Review      | Critically<br>Low | Melatonin<br>Control<br>Total sample: 14  | 1               | NR                                              | <b>Significant decrease</b> in sleep latency with morning<br>and nighttime melatonin doses; <b>significant decrease</b><br>in sleep latency to 10mins of persistent sleep with<br>early and continuous melatonin doses                                                                                                                                                                                                       |
| <i>Total Sleep Time</i>               |                   |                                           |                 |                                                 |                                                                                                                                                                                                                                                                                                                                                                                                                              |
| Buscemi, 2004<br>Meta-analysis        | High              | Melatonin: NR<br>Placebo: NR              | 11              | NR                                              | Mean difference [95% CI]:<br>4 [-10.5, 18.5] I-squared: 67.6%                                                                                                                                                                                                                                                                                                                                                                |
| Ferracioli-Oda, 2013<br>Meta-analysis | Critically<br>Low | Melatonin: NR<br>Placebo: NR              | 10              | polysomnography<br>actigraphy                   | Mean change [95% CI]:<br>0.34 [-11.19, 11.87] I-squared: NR                                                                                                                                                                                                                                                                                                                                                                  |

|                                      |                   |                                                  |    |                                                                       |                                                                                                                                                                                                                                                                                                                                                                            |
|--------------------------------------|-------------------|--------------------------------------------------|----|-----------------------------------------------------------------------|----------------------------------------------------------------------------------------------------------------------------------------------------------------------------------------------------------------------------------------------------------------------------------------------------------------------------------------------------------------------------|
| Lee, NA<br>Meta-analysis             | Critically<br>Low | Melatonin: NR<br>Placebo: NR                     | 11 | sleep diary<br>polysomnography<br>actigraphy                          | Mean difference [95% CI]:<br><b>3.3 [7.04, 13.65]</b> I-squared: 12%                                                                                                                                                                                                                                                                                                       |
| McCleery, 2016<br>Meta-analysis      | High              | Melatonin: 119<br>Placebo: 65                    | 2  | actigraphy                                                            | Mean difference [95% CI]:<br>10.68 [-16.22, 37.59] I-squared: 0%                                                                                                                                                                                                                                                                                                           |
| Xu, 2015<br>Meta-analysis            | Moderate          | Melatonin: 257<br>Placebo; light therapy:<br>240 | 8  | actigraphy                                                            | Mean difference [95% CI]:<br><b>24.36 [3.26, 45.46]</b> I-squared: 59%                                                                                                                                                                                                                                                                                                     |
| Zhang, 2016<br>Meta-analysis         | Critically<br>Low | Melatonin: 101<br>Placebo: 96                    | 4  | polysomnography<br>actigraphy                                         | Mean difference [95% CI]:<br>12.38 [-10.38, 35.15] I-squared: 34%                                                                                                                                                                                                                                                                                                          |
| Bellon, 2006<br>Systematic Review    | Critically<br>Low | Melatonin: NR<br>Placebo: NR                     | 15 | subjective<br>polysomnography<br>actigraphy                           | Adult patients: 2 studies report no change; 2 report decrease; 2 report <b>significant improvement</b> ; 1 reports subjective improvement but no change on PSG<br>Elderly patients: 4 studies report no change<br>Schizophrenia, dementia, Alzheimer's patients: 3 studies, non-significant improvement<br>Medically ill patients: 1 study, <b>significant improvement</b> |
| Chase, 1997<br>Systematic Review     | Critically<br>Low | Melatonin<br>Placebo<br>Total sample: 25         | 2  | wrist actigraphy; subjective<br>report                                | 1 study found no change in total sleep time; 1 study found Melatonin treatment resulted in a <b>significant effect</b> on reported time asleep                                                                                                                                                                                                                             |
| Costello, 2014<br>Systematic Review  | Moderate          | Melatonin<br>Placebo<br>Total sample: 791        | 1  | National sleep foundation<br>diary; Pittsburgh Sleep<br>Quality Index | Melatonin (Circadin) <b>significantly increased</b> sleep time compared to placebo ( <b>p=0.035</b> )                                                                                                                                                                                                                                                                      |
| Culpepper, 2015<br>Systematic Review | Critically<br>Low | Melatonin<br>Placebo<br>Total sample: 50         | 2  | sleep diary<br>polysomnography<br>actigraphy                          | Change in outcome (p-value):<br><b>-15.4 vs -5.5 minutes (p&lt;0.01)</b> [1 study]<br>1 study: No significant difference between groups (melatonin vs placebo);<br>1 study: <b>Significant reduction</b> in sleep latency ( <b>p&lt;0.01</b> )                                                                                                                             |
| <i>Wake after sleep onset</i>        |                   |                                                  |    |                                                                       |                                                                                                                                                                                                                                                                                                                                                                            |
| Buscemi, 2005<br>Meta-analysis       | High              | Melatonin: 68<br>Placebo: 68                     | 5  | sleep diary,<br>polysomnography                                       | Mean difference [95% CI]:<br>-9.65 [-33.57, 14.26] I-squared: 89.8%                                                                                                                                                                                                                                                                                                        |
| Buscemi, 2004<br>Meta-analysis       | High              | Melatonin: NR<br>Placebo: NR                     | 5  | NR                                                                    | Mean difference [95% CI]:<br>-1.4 [-21.8, 19] I-squared: 84%                                                                                                                                                                                                                                                                                                               |
|                                      |                   | Melatonin: NR<br>Placebo: NR                     | 3  | NR                                                                    | Mean difference [95% CI]:<br>-6.3 [-16.6, 3.9] I-squared: 35.3%                                                                                                                                                                                                                                                                                                            |
| Zhang, 2016<br>Meta-analysis         | Critically<br>Low | Melatonin: 75<br>Placebo: 69                     | 2  | polysomnography<br>actigraphy                                         | Mean difference [95% CI]:<br>10.93 [-6.07, 27.92] I-squared: 0%                                                                                                                                                                                                                                                                                                            |

|                                       |                   |                                          |    |                                                                                                                                                                                                            |                                                                                                                                                                                                                                                            |
|---------------------------------------|-------------------|------------------------------------------|----|------------------------------------------------------------------------------------------------------------------------------------------------------------------------------------------------------------|------------------------------------------------------------------------------------------------------------------------------------------------------------------------------------------------------------------------------------------------------------|
| Chase, 1997<br>Systematic Review      | Critically<br>Low | Melatonin<br>Placebo<br>Total sample: 12 | 1  | wrist actigraphy                                                                                                                                                                                           | Change in outcome (p-value):<br><b>49 minutes v 73 minutes (p&lt;0.001)</b>                                                                                                                                                                                |
| Vural, 2014<br>Systematic Review      | Critically<br>Low | Melatonin<br>Control<br>Total sample: 12 | 1  | NR                                                                                                                                                                                                         | <b>Significant decrease</b> in wake after sleep onset in melatonin group                                                                                                                                                                                   |
| <i>Sleep Quality</i>                  |                   |                                          |    |                                                                                                                                                                                                            |                                                                                                                                                                                                                                                            |
| Buscemi, 2004<br>Meta-analysis        | High              | Melatonin: NR<br>Placebo: NR             | 2  | NR                                                                                                                                                                                                         | Standardized mean difference [95% CI]:<br>0.5 [-0.1, 1.1] I-squared: 0%                                                                                                                                                                                    |
| Ferracioli-Oda, 2013<br>Meta-analysis | Critically<br>Low | Melatonin: NR<br>Placebo: NR             | 14 | polysomnography<br>actigraphy<br>sleep scales questionnaires<br>sleep logs                                                                                                                                 | Mean change [95% CI]:<br><b>0.22 [0.13, 0.32]</b> I-squared: 0%                                                                                                                                                                                            |
| McCleery, 2016<br>Meta-analysis       | High              | Melatonin: 111<br>Lactose placebo: 53    | 2  | carer-rated sleep quality                                                                                                                                                                                  | Standardized mean difference [95% CI]:<br>0.04 [-0.29, 0.38] I-squared: 46%                                                                                                                                                                                |
| Lee, NA<br>Meta-analysis              | Critically<br>Low | Melatonin: 675<br>Placebo: 672           | 10 | Leeds Sleep Evaluation<br>Questionnaire – Quality of<br>Sleep; The Pittsburgh Sleep<br>Quality Index Component 1;<br>The Northside Hospital Sleep<br>Medicine Institute Test; Daily<br>Sleep Questionnaire | Standardized mean difference [95% CI]:<br>0.16 [-0.06, 0.39] I-squared: 58%                                                                                                                                                                                |
| Sateia, 2017<br>Meta-analysis         | Critically<br>Low | Melatonin: 233<br>Placebo: 228           | 3  | subjective measure                                                                                                                                                                                         | Standardized mean difference [95% CI]:<br>0.21 [-0.36, 0.77] I-squared: 83%                                                                                                                                                                                |
| Bellon, 2006<br>Systematic Review     | Critically<br>Low | Melatonin: NR<br>Placebo: NR             | 11 | subjective<br>polysomnography<br>actigraphy                                                                                                                                                                | Adult patients: 4 studies showed <b>significant improvement</b> ; 2 studies no change<br>Elderly patients: 2 studies no change<br>Medically ill patients: 1 study <b>significant improvement</b><br>Dementia or Alzheimer's patients: 2 studies, no change |
| Chase, 1997<br>Systematic Review      | Critically<br>Low | Melatonin<br>Placebo<br>Total sample: 10 | 1  | daily sleep questionnaire                                                                                                                                                                                  | No statistical difference between groups noted, except patients in melatonin group had <b>significantly improved</b> perceived quality of sleep ( <b>p&lt;0.03</b> )                                                                                       |

|                                      |                   |                                                  |   |                                                                                                                                            |                                                                                                                                                                                                                                                                                                                                                                                                                                                                 |
|--------------------------------------|-------------------|--------------------------------------------------|---|--------------------------------------------------------------------------------------------------------------------------------------------|-----------------------------------------------------------------------------------------------------------------------------------------------------------------------------------------------------------------------------------------------------------------------------------------------------------------------------------------------------------------------------------------------------------------------------------------------------------------|
| Costello, 2014<br>Systematic Review  | Moderate          | Melatonin<br>Placebo<br>Total sample: 54         | 3 | sleep diary; subjective<br>sleep quality questionnaire;<br>Daily Sleep Questionnaire;<br>Stanford Sleepiness Scale;<br>Visual Analog Scale | Melatonin did not affect sleep quality in patients with<br>primary insomnia; melatonin <b>significantly improved</b><br>sleep quality compared to placebo, indicating that<br>controlled-release melatonin may effectively facilitate<br>discontinuation of benzodiazepine therapy while<br>maintaining good sleep quality; melatonin 5 mg<br>resulted in an improvement in overall subjective sleep<br>quality ( <b>p=0.03</b> ) compared to 1 mg and placebo. |
| Culpepper, 2015<br>Systematic Review | Critically<br>Low | Melatonin<br>Placebo<br>Total sample: 48         | 2 | sleep questionnaire: visual<br>analogue scale; 38-item<br>Northside Hospital Sleep<br>Medicine Institute test                              | Change in outcome (p-value):<br><b>1.78 vs 3.44 (p&lt;0.05)</b><br>1 study: No significant difference between groups<br>(melatonin vs placebo);<br>1 study: <b>Significantly improved</b> sleep quality                                                                                                                                                                                                                                                         |
|                                      |                   | Melatonin<br>Placebo<br>Total sample: 344        | 2 | polysomnography sleep<br>diary (2)                                                                                                         | Change in outcome (p-value):<br><b>26% v 15% (p&lt;0.05)</b><br>1 study: no significant difference between groups;<br>1 study: <b>Higher rate</b> of sleep quality in patients while<br>on melatonin vs placebo                                                                                                                                                                                                                                                 |
| Vural, 2014<br>Systematic Review     | Critically<br>Low | Melatonin<br>Control<br>Total sample: 27         | 1 | NR                                                                                                                                         | <b>Significant increase</b> in sleep quality in melatonin<br>group                                                                                                                                                                                                                                                                                                                                                                                              |
| <i>Sleep Satisfaction</i>            |                   |                                                  |   |                                                                                                                                            |                                                                                                                                                                                                                                                                                                                                                                                                                                                                 |
| Vural, 2014<br>Systematic Review     | Critically<br>Low | Melatonin<br>Control<br>Total sample: 112        | 1 | % nights scored good;<br>% good mood                                                                                                       | <b>Significant increase</b> in % nights scored good and<br>significant increase in % good mood in melatonin<br>group                                                                                                                                                                                                                                                                                                                                            |
| <i>Sleep Efficiency</i>              |                   |                                                  |   |                                                                                                                                            |                                                                                                                                                                                                                                                                                                                                                                                                                                                                 |
| Buscemi, 2004<br>Meta-analysis       | High              | Melatonin: 117<br>Placebo: 117                   | 9 | NR                                                                                                                                         | Mean difference [95% CI]:<br>1.45 [-0.66, 3.56] I-squared: 62.8%                                                                                                                                                                                                                                                                                                                                                                                                |
| McCleery, 2016<br>Meta-analysis      | High              | Melatonin: 104<br>Placebo: 47                    | 1 | Actigraphy                                                                                                                                 | Mean difference [95% CI]:<br>-0.01 [-0.04, 0.03] I-squared: 0%                                                                                                                                                                                                                                                                                                                                                                                                  |
| Xu, 2015<br>Meta-analysis            | Moderate          | Melatonin: 232<br>Placebo; light therapy:<br>214 | 6 | Actigraphy                                                                                                                                 | Mean difference [95% CI]:<br>1.78 [-0.13, 3.70] I-squared: 25%                                                                                                                                                                                                                                                                                                                                                                                                  |
| Lee, NA<br>Meta-analysis             | Critically<br>Low | Melatonin: 123<br>Placebo: 125                   | 8 | sleep diary<br>polysomnography<br>actigraphy                                                                                               | Mean difference [95% CI]:<br><b>2.74 [0.41, 5.88]</b> I-squared: 54%                                                                                                                                                                                                                                                                                                                                                                                            |
| Zhang, 2016<br>Meta-analysis         | Critically<br>Low | Melatonin: 75<br>Placebo: 69                     | 2 | polysomnography<br>actigraphy                                                                                                              | Mean difference [95% CI]:<br>-0.01 [-0.04, 0.02] I-squared: 0%                                                                                                                                                                                                                                                                                                                                                                                                  |

|                                       |                   |                                          |    |                                             |                                                                                                                                                                                                                                                                                   |
|---------------------------------------|-------------------|------------------------------------------|----|---------------------------------------------|-----------------------------------------------------------------------------------------------------------------------------------------------------------------------------------------------------------------------------------------------------------------------------------|
| Bellon, 2006<br>Systematic Review     | Critically<br>Low | Melatonin: NR<br>Placebo: NR             | 12 | subjective<br>polysomnography<br>actigraphy | Adult patients: No change across all studies<br>Elderly patients: 2 studies no change; 2 studies<br><b>significant improvement</b><br>Schizophrenia patients: 1 study <b>significant<br/>improvement</b><br>Dementia or Alzheimer's: 2 studies, no change                         |
| Chase, 1997<br>Systematic Review      | Critically<br>Low | Melatonin<br>Placebo<br>Total sample: 35 | 2  | wrist actigraphy                            | Proportion of respondents (p-value):<br><b>83% v 75% (p&lt;0.001)</b><br>Increase in sleep efficiency; A <b>significant difference</b><br>in sleep efficiency was noted in the elderly without<br>sleep disorders and compared with those with<br>insomnia ( <b>p&lt;0.0001</b> ) |
| Culpepper, 2015<br>Systematic Review  | Critically<br>Low | Melatonin<br>Placebo<br>Total sample: 40 | 1  | Actigraphy                                  | No significant difference between groups                                                                                                                                                                                                                                          |
| <i>Health-related Quality of Life</i> |                   |                                          |    |                                             |                                                                                                                                                                                                                                                                                   |
| Vural, 2014<br>Systematic Review      | Critically<br>Low | Melatonin<br>Control<br>Total sample: 42 | 1  | NR                                          | <b>Significant increase</b> in quality of life in melatonin<br>group                                                                                                                                                                                                              |

**Table E7. Diphenhydramine**

| Author, Year<br>Synthesis type          | AMSTAR<br>rating  | Intervention and sample size                         | # of<br>studies | Measurement<br>method                             | Pooled Estimates (MA) or<br>Narrative Results (from SR with no MA)                                                                                                                                                                                                                 |
|-----------------------------------------|-------------------|------------------------------------------------------|-----------------|---------------------------------------------------|------------------------------------------------------------------------------------------------------------------------------------------------------------------------------------------------------------------------------------------------------------------------------------|
| <i>Sleep onset latency</i>              |                   |                                                      |                 |                                                   |                                                                                                                                                                                                                                                                                    |
| Sateia, 2017<br>Meta-analysis           | Critically<br>Low | Diphenhydramine: 79 patients<br>Placebo: 84 patients | 2               | subjective measure                                | Mean difference [95% CI]:<br>-2.47 [-8.17, 3.23] I-squared: 0%                                                                                                                                                                                                                     |
| Culpepper, 2015<br>Systematic Review    | Critically<br>Low | Diphenhydramine<br>Placebo<br>Total sample: 226      | 3               | sleep diary                                       | Change in outcome (p-value):<br>34.2 vs 36.8 mins (p=NS);<br>21.6 vs 23.8 mins (p=NS);<br><b>138.5 vs 99.9 mins (p&lt;0.05)</b>                                                                                                                                                    |
| Vande Griend, 2012<br>Systematic Review | Critically<br>Low | Diphenhydramine<br>Placebo<br>Total sample: 332      | 4               | sleep diaries<br>questionnaire<br>polysomnography | Overall, the outcomes analyzed from all four trials<br>provided mixed results, with the majority not being<br>statistically different than placebo (P > 0.05); 3 studies<br>found no difference compared to placebo and 2 studies<br>found the drug was <b>superior to placebo</b> |
| <i>Total Sleep Time</i>                 |                   |                                                      |                 |                                                   |                                                                                                                                                                                                                                                                                    |
| Sateia, 2017<br>Meta-analysis           | Critically<br>Low | Diphenhydramine: 77 patients<br>Placebo: 84 patients | 2               | subjective measure                                | Mean difference [95% CI]:<br>17.86 [-3.79, 39.51] I-squared: 0%                                                                                                                                                                                                                    |



|                                         |                   |                                                 |   |                                                                    |                                                                                                                                                                                                                                                                                           |
|-----------------------------------------|-------------------|-------------------------------------------------|---|--------------------------------------------------------------------|-------------------------------------------------------------------------------------------------------------------------------------------------------------------------------------------------------------------------------------------------------------------------------------------|
| Culpepper, 2015<br>Systematic Review    | Critically<br>Low | Diphenhydramine<br>Placebo<br>Total Sample: 204 | 2 | sleep diary                                                        | Change in outcome (p-value):<br>6.6 vs 6.3 minutes (p=NS);<br>No change (p=NS);<br>No significant changes in TST compared to placebo                                                                                                                                                      |
| Vande Griend, 2012<br>Systematic Review | Critically<br>Low | Diphenhydramine<br>Placebo<br>Total sample: 332 | 4 | sleep diaries<br>polysomnography<br>questionnaire<br>(unspecified) | Overall, the outcomes analyzed from all four trials provided mixed results, with the majority not being statistically different than placebo (P > 0.05); 4 studies found no significant difference between groups; 1 study found drug to be <b>superior</b>                               |
| <i>Wake after sleep onset</i>           |                   |                                                 |   |                                                                    |                                                                                                                                                                                                                                                                                           |
| Vande Griend, 2012<br>Systematic Review | Critically<br>Low | Diphenhydramine<br>Placebo<br>Total sample: 17  | 1 | questionnaire<br>(unspecified)                                     | Overall, the outcomes analyzed from all four trials provided mixed results, with the majority not being statistically different than placebo (p>0.05)                                                                                                                                     |
| <i>Sleep quality</i>                    |                   |                                                 |   |                                                                    |                                                                                                                                                                                                                                                                                           |
| Culpepper, 2015<br>Systematic Review    | Critically<br>Low | Diphenhydramine<br>Placebo<br>Total Sample: 20  | 1 | sleep diary                                                        | Change in outcome (p-value):<br>No difference in subjective scores<br>3.0 vs 2.9 (p=NS)<br>No significant treatment difference for sleep quality                                                                                                                                          |
| <i>Sleep efficiency</i>                 |                   |                                                 |   |                                                                    |                                                                                                                                                                                                                                                                                           |
| Vande Griend, 2012<br>Systematic Review | Critically<br>Low | Diphenhydramine<br>Placebo<br>Total Sample: 204 | 1 | sleep diaries<br>polysomnography                                   | Overall, the outcomes analyzed from all four trials provided mixed results, with the majority not being statistically different than placebo (p>0.05); Sleep diary data showed <b>significant improvement (p&lt;0.05)</b> ; polysomnography data showed no difference compared to placebo |
| <i>Insomnia Severity Index</i>          |                   |                                                 |   |                                                                    |                                                                                                                                                                                                                                                                                           |
| Culpepper, 2015<br>Systematic Review    | Critically<br>Low | Diphenhydramine<br>Placebo<br>Total sample: 184 | 1 | ISI                                                                | Change in outcome (p=value):<br><b>9.39 vs 11.63 (p&lt;0.01)</b><br><b>Significantly lower ISI with diphenhydramine after 2 weeks</b>                                                                                                                                                     |

**Table E8. Cognitive Behavioural Interventions**

| Author, Year<br>Synthesis type | AMSTAR<br>rating  | Intervention and sample size                                                                                                                                                | # of<br>studies | Measurement<br>method | Pooled Estimates (MA) or<br>Narrative Results (from SR with no MA)                  |
|--------------------------------|-------------------|-----------------------------------------------------------------------------------------------------------------------------------------------------------------------------|-----------------|-----------------------|-------------------------------------------------------------------------------------|
| <i>Sleep onset latency</i>     |                   |                                                                                                                                                                             |                 |                       |                                                                                     |
| Brasure, 2015<br>Meta-analysis | High              | CBT-I: 626<br>sham treatment/ placebo, wait-list control, no treatment, or sleep hygiene/sleep education: 620                                                               | 15              | subjective report     | Mean difference [95% CI]:<br><b>-12.7 [-18.23, -7.18]</b> I-squared: 78%            |
|                                |                   | CBT-I: 108 [older adults]<br>placebo, wait-list control, no treatment, or sleep hygiene/sleep education: 83                                                                 | 3               | subjective report     | Mean difference [95% CI]:<br><b>-9.98 [-16.48, -3.48]</b> I-squared: 0%             |
|                                |                   | CBT-I: 61 [adults with chronic pain]<br>passive control (placebo or sham treatment or wait-list): 61                                                                        | 3               | subjective report     | Mean difference [95% CI]:<br><b>-26.5 [-43.25, -9.75]</b> I-squared:<br>77%         |
| Cheng, 2012<br>Meta-analysis   | Low               | CBT - sleep hygiene; stimulus control; relaxation training; sleep restriction; cognitive restructuring: NR<br>wait list control: NR                                         | 4               | sleep diary           | Standardized mean difference [95% CI]:<br><b>-0.55 [-0.80, -0.30]</b> I-squared: 0% |
| Ho, 2016<br>Meta-analysis      | Low               | CBT- image rehearsal therapy; exposure, re-scripting and relaxation therapy; mind-body bridging; behavioural sleep intervention: NR<br>wait list control; sleep hygiene: NR | 4               | sleep diary           | Standardized mean difference [95% CI]:<br><b>-0.83 [-1.19, -0.47]</b> I-squared: 0% |
| Irwin, 2006<br>Meta-analysis   | Critically<br>Low | CBT – relaxation, biofeedback, hypnosis, sleep compression/ restriction, paradoxical intention: NR<br>control: NR                                                           | 21              | self-report           | Cohen’s <i>d</i> [95% CI]:<br><b>-0.52 [-0.68 to -0.82]</b> Q-statistic: 74.66      |

| <b>Author, Year<br/>Synthesis type</b> | <b>AMSTAR<br/>rating</b> | <b>Intervention and sample size</b>                                                                                                                                                            | <b># of<br/>studies</b> | <b>Measurement<br/>method</b>                                        | <b>Pooled Estimates (MA) or<br/>Narrative Results (from SR with no MA)</b>         |
|----------------------------------------|--------------------------|------------------------------------------------------------------------------------------------------------------------------------------------------------------------------------------------|-------------------------|----------------------------------------------------------------------|------------------------------------------------------------------------------------|
| Johnson, 2016<br>Meta-analysis         | Moderate                 | CBT-I with both cognitive and behavioral components: 423<br>waitlist control; treatment-as-usual; sleep education; behavioral placebo; mindfulness-based stress reduction: 297                 | 8                       | sleep diary                                                          | Cohen's <i>d</i> [95% CI]:<br><b>0.27 [0.11 to 0.44]</b> I-squared: 0.2%           |
| Koffel, 2015<br>Meta-analysis          | Critically<br>Low        | group CBT-I - stimulus control, sleep restriction, and addressing dysfunctional beliefs about sleep: NR<br>wait list, treatment as usual, placebo: NR                                          | 6                       | sleep diary                                                          | Mean effect size [95% CI]:<br><b>0.47 [0.27; 0.66]</b> I-squared: NR               |
| Montgomery, 2003<br>Meta-analysis      | High                     | CBT - sleep hygiene; stimulus control; muscle relaxation; sleep restriction; cognitive therapy; education; imagery training: 86<br>wait-list control, placebo: 49                              | 3                       | sleep diary                                                          | Mean difference [95% CI]:<br><b>-3 [-8.92, 2.92]</b> I-squared: 0%                 |
| Navarro-Bravo, 2015<br>Meta-analysis   | Moderate                 | CBT - sleep restriction, stimulus control, sleep education/hygiene: NR<br>Placebo; wait list control; stress management and wellness training; treatment as usual; sleep hygiene/education: NR | 7                       | sleep diary;<br>actigraphy; sleep evaluation (4-item questionnaire); | Cohen's <i>d</i> [95% CI]:<br><b>-0.46 [-0.76, -0.15]</b> Chi square: 19.88; 0.003 |
| Seyffert, 2016<br>Meta-analysis        | Low                      | Internet-based CBT - sleep education, stimulus control, sleep restriction, relaxation, sleep hygiene, cognitive techniques: NR<br>Wait-list control, Internet control, treatment as usual: NR  | 7                       | sleep diary                                                          | Mean difference [95% CI]:<br><b>-10.68 [-16.00, -5.37]</b> I-squared: 4.3%         |

| Author, Year<br>Synthesis type       | AMSTAR<br>rating | Intervention and sample size                                                                                                                                                                                                                              | # of<br>studies | Measurement<br>method                                                  | Pooled Estimates (MA) or<br>Narrative Results (from SR with no MA)                                                |
|--------------------------------------|------------------|-----------------------------------------------------------------------------------------------------------------------------------------------------------------------------------------------------------------------------------------------------------|-----------------|------------------------------------------------------------------------|-------------------------------------------------------------------------------------------------------------------|
| van Straten, 2007<br>Meta-analysis   | Low              | CBT - relaxation; sleep restriction;<br>stimulus control; paradoxical<br>intention; identifying and challenging<br>dysfunctional thoughts: NR                                                                                                             | 108             | sleep diary                                                            | Hedges <i>g</i> [95% CI]:<br><b>0.57 [0.50, 0.65]</b> I-squared: 48%                                              |
| van Straten, 2009<br>Meta-analysis   | Moderate         | waitlist control; no treatment;<br>placebo; psycho-education: NR<br>CBT (self-help): stimulus-control;<br>sleep restriction; cognitive therapy;<br>sleep hygiene; relaxation; in-bed<br>exercises: NR                                                     | 8               | sleep diary                                                            | Cohen's <i>d</i> [95% CI]:<br><b>0.29 [0.15, 0.43]</b> I-squared: 0%                                              |
| Ye, 2016<br>Meta-analysis            | Moderate         | waiting list: NR<br>CBT - sleep hygiene education;<br>cognitive restructuring; stimulus<br>control; sleep restriction; relaxation<br>therapy; hierarchy development;<br>imagery training; scheduled pseudo<br>desensitization; breathing control:<br>1006 | 15              | NR                                                                     | Mean difference [95% CI]:<br><b>-18.41 [-23.21, 13.60]</b> I-squared: 62%                                         |
| Brooks, 2014<br>Systematic<br>Review | Low              | wait-list control, treatment as usual;<br>internet + email; internet +<br>telephone; telephone; internet-based<br>control: 1004<br>CBT-I (unspecified)<br>Control (unspecified)                                                                           | 1               | daily sleep diary;<br>Pittsburgh Sleep<br>Quality Index;<br>actigraphy | Improved self-reported sleep latency maintained<br>for 6 months post-treatment; not corroborated by<br>actigraphy |
| Ishak, 2012<br>Systematic<br>Review  | Low              | CBT (unspecified)<br>Placebo; no treatment; usual care<br>Total sample: 209                                                                                                                                                                               | 1               | SF-36                                                                  | <b>Significant reductions</b> in sleep latency for CBT<br>compared to placebo ( <b>p&lt;0.01</b> )                |

| Author, Year<br>Synthesis type          | AMSTAR<br>rating  | Intervention and sample size                                                                                                                                                                                                                                                         | # of<br>studies | Measurement<br>method            | Pooled Estimates (MA) or<br>Narrative Results (from SR with no MA)                                                                                                                                           |
|-----------------------------------------|-------------------|--------------------------------------------------------------------------------------------------------------------------------------------------------------------------------------------------------------------------------------------------------------------------------------|-----------------|----------------------------------|--------------------------------------------------------------------------------------------------------------------------------------------------------------------------------------------------------------|
| Dickerson, 2014<br>Systematic<br>Review | High              | CBT (unspecified):<br>Control: usual treatment; waitlist<br>crossover; waitlist control; control;<br>usual treatment                                                                                                                                                                 | 1               | actigraphy                       | Mean change [95% CI]:<br><b>-0.42 [-0.80 to -0.01]</b><br>CBT moderate effect in decreasing insomnia<br>symptoms                                                                                             |
| Venables, 2014<br>Systematic<br>Review  | Critically<br>Low | Total sample: 150<br>group CBT: 660<br>No comparator (pre- post-<br>intervention)<br>professionally administered CBT:<br>615                                                                                                                                                         | 8               | NR                               | The group CBT studies obtained improvements in<br>all sleep parameters, group delivered CBT<br>sessions may be slightly more effective than<br>individual sessions                                           |
| Wang, 2005<br>Systematic<br>Review      | Moderate          | No comparator (pre- post-<br>intervention)<br>CBT: stimulus control; sleep<br>restriction; cognitive therapy; sleep<br>hygiene education; sleep scheduling<br>control; Quasi desensitization; self-<br>monitoring control; sleep hygiene<br>recommendations; waiting-list<br>control | 8               | actigraphy;<br>sleep diary       | 7 of 8 studies that used CBT found a reduction in<br>sleep latency (values not reported)                                                                                                                     |
| Ho, 2015<br>Meta-analysis               | Low               | Total sample: 109<br>Multi-component CBT - stimulus<br>control, sleep restriction, sleep<br>hygiene, relaxation and/or cognitive<br>therapy: NR<br>waiting-list control; routine care or<br>no treatment: NR                                                                         | 1               | sleep diary; wrist<br>actigraphy | Change in outcome:<br>CBT: 61→28mins; control: 74→70mins<br>CBT <b>significantly improved</b> sleep latency<br>compared to control with sustained mean<br>reduction by 50% in CBT group ( <b>p&lt;0.05</b> ) |
|                                         |                   |                                                                                                                                                                                                                                                                                      | 8               | sleep diary                      | Hedges g [95% CI]:<br><b>-0.70 [-1.0, -0.4]</b> I-squared: 77%                                                                                                                                               |

| Author, Year<br>Synthesis type   | AMSTAR<br>rating  | Intervention and sample size                                                                                                                                                    | # of<br>studies | Measurement<br>method       | Pooled Estimates (MA) or<br>Narrative Results (from SR with no MA)          |
|----------------------------------|-------------------|---------------------------------------------------------------------------------------------------------------------------------------------------------------------------------|-----------------|-----------------------------|-----------------------------------------------------------------------------|
| Trauer, 2015<br>Meta-analysis    | Moderate          | Multi-modal CBT - cognitive therapy, stimulus control, sleep restriction, relaxation, sleep hygiene: NR                                                                         | 16              | sleep diary                 | Mean difference [95% CI]:<br><b>-19.03 [-23.93, 14.12]</b> I-squared: 41.9% |
| Buscemi, 2005<br>Meta-analysis   | High              | Wait-list control, treatment as usual, Sleep hygiene, sham, placebo: NR<br>Multi-component CBT - Paradoxical Intention; Sleep compression; Stimulus control:152<br>Placebo: 124 | 9               | sleep diary                 | Mean difference [95% CI]:<br><b>-4.57 [-9.75, 0.61]</b> I-squared: 12.5%    |
| Okajima, 2011<br>Meta-analysis   | Critically<br>Low | Multi-component CBT - sleep hygiene education; sleep restriction; stimulus control; cognitive therapy; relaxation; paradoxical intention: NR                                    | 7               | sleep diary                 | Cohen's <i>d</i> [95% CI]:<br><b>0.4 [0.21, 0.57]</b> I-squared: NR         |
|                                  |                   | wait-list control, placebo; sleep hygiene education; control(unspecified); treatment as usual: NR                                                                               | 2               | polysomnography; actigraphy | Cohen's <i>d</i> [95% CI]:<br><b>0.59 [0.08, 1.02]</b> I-squared: NR        |
| Zachariae, 2016<br>Meta-analysis | Moderate          | Multi-component CBT - stimulus control, sleep hygiene; cognitive therapy; sleep restriction; relaxation techniques: NR<br>Wait-list control, treatment as usual: NR             | 10              | NR                          | Hedges <i>g</i> [95% CI]:<br><b>0.41 [0.29, 0.53]</b> I-squared: 0%         |

| Author, Year<br>Synthesis type        | AMSTAR<br>rating  | Intervention and sample size                                                                                                                                                                                                                                            | # of<br>studies | Measurement<br>method | Pooled Estimates (MA) or<br>Narrative Results (from SR with no MA)                                          |
|---------------------------------------|-------------------|-------------------------------------------------------------------------------------------------------------------------------------------------------------------------------------------------------------------------------------------------------------------------|-----------------|-----------------------|-------------------------------------------------------------------------------------------------------------|
| Howell, 2014<br>Systematic<br>Review  | Moderate          | Multi-component CBT - sleep hygiene, sleep restriction, stimulus control, cognitive restructuring, and relaxation therapies<br><br>Usual care; wait-list control, healthy eating and nutrition; sleep education and hygiene only; no treatment<br><br>Total sample: 235 | 3               | sleep diary           | Sleep latency had <b>significant improvement</b> in all studies post CBT intervention (values not reported) |
| McCurry, 2007<br>Systematic<br>Review | Critically<br>Low | Multi-component CBT - sleep hygiene, relaxation, sleep compression, cognitive behavioural therapy, stimulus control<br><br>delayed treatment; wait-list control, placebo; stress management<br><br>Total sample: 92                                                     | 1               | sleep logs            | CBT <b>significantly decreased</b> sleep latency compared to stress management (p-values not reported)      |
| Yang, 2014<br>Meta-analysis           | Moderate          | CBT + relaxation (sleep hygiene; relaxation CD): 13<br><br>Sleep hygiene education; treatment as usual: 13                                                                                                                                                              | 1               | NR                    | Standardized mean difference [95% CI]:<br><b>1.33 [0.46, 2.19]</b> I-squared: 0%                            |
| Buscemi, 2005<br>Meta-analysis        | High              | CBT + relaxation: relaxation training; cognitive control; stimulus control; group relaxation; aggressive muscle relaxation; cognitive distraction: 45<br><br>placebo: 46                                                                                                | 4               | sleep diary           | Mean difference [95% CI]:<br><b>-21.5 [-42.2, -0.8]</b> I-squared: 74.4%                                    |
| van Straten, 2009<br>Meta-analysis    | Moderate          | CBT (self-help): stimulus-control; sleep restriction; cognitive therapy; sleep hygiene; relaxation; in-bed exercises: NR<br><br>CBT (face-to-face)                                                                                                                      | 3               | sleep diary           | Cohen's <i>d</i> [95% CI]:<br><b>-0.37 [-0.73, -0.02]</b> I-squared: 0%                                     |

| Author, Year<br>Synthesis type | AMSTAR<br>rating  | Intervention and sample size                                                                                                         | # of<br>studies | Measurement<br>method | Pooled Estimates (MA) or<br>Narrative Results (from SR with no MA)          |
|--------------------------------|-------------------|--------------------------------------------------------------------------------------------------------------------------------------|-----------------|-----------------------|-----------------------------------------------------------------------------|
| Buscemi, 2005<br>Meta-analysis | High              | CBT + relaxation - relaxation training; cognitive control; stimulus control; group relaxation: 18                                    | 2               | sleep diary           | Mean difference [95% CI]:<br>-9.2 [-37.9, 19.5] I-squared: 37.1%            |
|                                |                   | progressive muscle relaxation; EMG biofeedback; group relaxation: 16                                                                 |                 |                       |                                                                             |
|                                |                   | CBT + relaxation - relaxation training; stimulus control; aggressive muscle relaxation; cognitive distraction: 23                    | 2               | sleep diary           | Mean difference [95% CI]:<br>-4.6 [-20.7, 11.5] I-squared: 0%               |
|                                |                   | CBT - cognitive therapy; sleep restriction; stimulus control; sleep hygiene: 24                                                      |                 |                       |                                                                             |
| <i>Total Sleep Time</i>        |                   |                                                                                                                                      |                 |                       |                                                                             |
| Brasure, 2015<br>Meta-analysis | High              | CBT-I: 621<br>sham treatment/ placebo, wait-list control, no treatment, or sleep hygiene/sleep education): 612                       | 15              | subjective report     | Mean difference [95% CI]:<br><b>14.24 [2.08, 26.39]</b> I-squared: 56%      |
| Cheng, 2012<br>Meta-analysis   | Low               | CBT - sleep hygiene; stimulus control; relaxation training; sleep restriction; cognitive restructuring: NR                           | 4               | sleep diary           | Standardized mean difference [95% CI]:<br>0.22 [-0.03, 0.46] I-squared: 0%  |
| Ho, 2016<br>Meta-analysis      | Low               | wait list control: NR                                                                                                                |                 |                       |                                                                             |
|                                |                   | CBT - image rehearsal therapy; exposure, re-scripting and relaxation therapy; mind-body bridging; behavioural sleep intervention: NR | 4               | sleep diary           | Standardized mean difference [95% CI]:<br>0.39 [-0.05, 0.84] I-squared: 38% |
| Irwin, 2006<br>Meta-analysis   | Critically<br>Low | wait list control; sleep hygiene: NR                                                                                                 |                 |                       |                                                                             |
|                                |                   | CBT – relaxation, biofeedback, hypnosis, sleep compression/restriction paradoxical intention: NR                                     | 16              | self-report           | Cohen's <i>d</i> [95% CI]:<br>0.17 [-0.13, 0.48] Q-statistic: 50.27         |
|                                |                   | control: NR                                                                                                                          |                 |                       |                                                                             |



| Author, Year<br>Synthesis type          | AMSTAR<br>rating  | Intervention and sample size                                                                                                                                                                                                     | # of<br>studies | Measurement<br>method                                                                   | Pooled Estimates (MA) or<br>Narrative Results (from SR with no MA)        |
|-----------------------------------------|-------------------|----------------------------------------------------------------------------------------------------------------------------------------------------------------------------------------------------------------------------------|-----------------|-----------------------------------------------------------------------------------------|---------------------------------------------------------------------------|
| Koffel, 2015<br>Meta-analysis           | Critically<br>Low | group CBT-I - stimulus control, sleep restriction, and addressing dysfunctional beliefs about sleep: NR<br>wait list, treatment as usual, placebo: NR                                                                            | 6               | sleep diary                                                                             | Mean effect size [95% CI]:<br>-0.04 [-0.32, 0.23] I-squared: NR           |
| Montgomery,<br>2003<br>Meta-analysis    | High              | CBT - sleep hygiene; stimulus control; muscle relaxation; sleep restriction; cognitive therapy; education; imagery training: 76                                                                                                  | 4               | Sleep Diary                                                                             | Mean difference [95% CI]:<br>-14.56 [-36.13, 7.01] I-squared: 0%          |
|                                         |                   | wait-list control, placebo: 67<br>CBT - sleep hygiene; stimulus control; muscle relaxation; sleep restriction; cognitive therapy; education; imagery training: 30                                                                | 2               | polysomnography                                                                         | Mean difference [95% CI]:<br>18.93 [-2.74, 40.60] I-squared: 0%           |
| Navarro-Bravo,<br>2015<br>Meta-analysis | Moderate          | wait-list control, placebo: 29<br>CBT - sleep restriction, stimulus control, sleep education/hygiene: NR<br>placebo; wait list control; stress management and wellness training; treatment as usual; sleep hygiene/education: NR | 8               | sleep diary<br>polysomnography<br>actigraphy<br>sleep evaluation (4-item questionnaire) | Cohen's <i>d</i> [95% CI]:<br>0.11 [-0.15, 0.37] Chi square: 17.56; 0.014 |
| Seyffert, 2016<br>Meta-analysis         | Low               | Internet-based CBT - sleep education, stimulus control, sleep restriction, relaxation, sleep hygiene, cognitive techniques: NR<br>Wait-list control, internet control, Treatment as usual: NR                                    | 8               | sleep diary                                                                             | Mean difference [95% CI]:<br><b>19.57 [8.56, 30.58]</b> I-squared: 24.7%  |

| Author, Year<br>Synthesis type          | AMSTAR<br>rating | Intervention and sample size                                                                                                                                                                                                                                    | # of<br>studies | Measurement<br>method | Pooled Estimates (MA) or<br>Narrative Results (from SR with no MA)                                                                       |
|-----------------------------------------|------------------|-----------------------------------------------------------------------------------------------------------------------------------------------------------------------------------------------------------------------------------------------------------------|-----------------|-----------------------|------------------------------------------------------------------------------------------------------------------------------------------|
| van Straten, 2007<br>Meta-analysis      | Low              | CBT - relaxation; sleep restriction;<br>stimulus control; paradoxical<br>intention; identifying and challenging<br>dysfunctional thoughts: NR                                                                                                                   | 91              | sleep diary           | Hedges <i>g</i> [95% CI]:<br><b>0.16 [0.08, 0.24]</b> I-squared: 47%                                                                     |
| van Straten, 2009<br>Meta-analysis      | Moderate         | waitlist control; no treatment;<br>placebo; psycho-education: NR<br>CBT - self-help: stimulus-control;<br>sleep restriction; cognitive therapy;<br>sleep hygiene; relaxation; in-bed<br>exercises: NR                                                           | 8               | sleep diary           | Cohen's <i>d</i> [95% CI]:<br>-0.01 [-0.14, 0.14] I-squared: 18.8%                                                                       |
| Ye, 2016<br>Meta-analysis               | Moderate         | waiting list: NR<br>CBT - sleep hygiene education;<br>cognitive restructuring; stimulus<br>control; sleep restriction; relaxation<br>therapy; hierarchy development;<br>imagery training; scheduled pseudo<br>desensitization; breathing control:<br>1006       | 15              | sleep diary           | Mean difference [95% CI]:<br><b>22.3 [16.38, 28.23]</b> I-squared: 12%                                                                   |
| Dickerson, 2014<br>Systematic<br>Review | High             | wait-list control, treatment as usual;<br>internet + email; internet +<br>telephone; telephone; internet-based<br>control: 1003<br>CBT<br>usual treatment; waitlist crossover;<br>waitlist control; control; usual<br>treatment<br>Total sample: 150<br>CBT: 12 | 1               | actigraphy            | Change in outcome:<br>CBT vs placebo: <b>-0.81 [-1.21, -0.42]</b><br>CBT had a <b>moderate effect</b> in decreasing<br>insomnia symptoms |
|                                         |                  | No comparator (pre- post-<br>intervention)                                                                                                                                                                                                                      | 1               | sleep diary           | Change in outcome:<br>Pre-/post scores: 0.47 [-0.27, 1.350]                                                                              |

| Author, Year<br>Synthesis type         | AMSTAR<br>rating  | Intervention and sample size                                                                                                                 | # of<br>studies | Measurement<br>method         | Pooled Estimates (MA) or<br>Narrative Results (from SR with no MA)                                                                                 |
|----------------------------------------|-------------------|----------------------------------------------------------------------------------------------------------------------------------------------|-----------------|-------------------------------|----------------------------------------------------------------------------------------------------------------------------------------------------|
| Venables, 2014<br>Systematic<br>Review | Critically<br>Low | group CBT: 660                                                                                                                               | 8               | NR                            | 7 of 8 studies obtained improvements in total sleep time; group delivered CBT sessions may be slightly more effective than individual sessions.    |
|                                        |                   | No comparator (pre- post-intervention)                                                                                                       |                 |                               |                                                                                                                                                    |
|                                        |                   | professionally administered CBT: 615                                                                                                         | 8               | actigraphy<br>sleep diary     | 4 of 8 studies reported increased TST in the intervention group, 4 of 8 found no significant increase in TST in the intervention or control groups |
|                                        |                   | No comparator (pre- post-intervention)                                                                                                       |                 |                               |                                                                                                                                                    |
| Ho, 2015<br>Meta-analysis              | Low               | Multi-component CBT - stimulus control, sleep restriction, sleep hygiene, relaxation and/or cognitive therapy: NR                            | 8               | sleep diary                   | Hedges <i>g</i> [95% CI]:<br><b>0.31 [0.0, 0.6]</b> I-squared: 78%                                                                                 |
|                                        |                   | waiting-list control; routine care or no treatment: NR                                                                                       |                 |                               |                                                                                                                                                    |
| Okajima, 2011<br>Meta-analysis         | Critically<br>Low | Multi-component CBT - sleep hygiene education; sleep restriction; stimulus control; cognitive therapy; relaxation; paradoxical intention: NR | 7               | sleep diary                   | Cohen's <i>d</i> [95% CI]:<br><b>0.21 [0.03, 0.39]</b> I-squared: NR                                                                               |
|                                        |                   | wait-list control, placebo; sleep hygiene education; control(unspecified); treatment as usual: NR                                            | 2               | polysomnography<br>actigraphy | Cohen's <i>d</i> [95% CI]:<br><b>0.71 [0.21, 1.12]</b> I-squared: NR                                                                               |
| Trauer, 2015<br>Meta-analysis          | Moderate          | Multi-component CBT - cognitive therapy, stimulus control, sleep restriction, relaxation, sleep hygiene: NR                                  | 16              | sleep diary                   | Mean difference [95% CI]:<br>7.61 [-0.51, 15.74] I-squared: 3.1%                                                                                   |
|                                        |                   | WLC/TAU, Sleep hygiene, sham, placebo: NR                                                                                                    |                 |                               |                                                                                                                                                    |

| Author, Year<br>Synthesis type       | AMSTAR<br>rating | Intervention and sample size                                                                                                                                                                                                                   | # of<br>studies | Measurement<br>method        | Pooled Estimates (MA) or<br>Narrative Results (from SR with no MA)                              |
|--------------------------------------|------------------|------------------------------------------------------------------------------------------------------------------------------------------------------------------------------------------------------------------------------------------------|-----------------|------------------------------|-------------------------------------------------------------------------------------------------|
| Zachariae, 2016<br>Meta-analysis     | Moderate         | Multi-component CBT - stimulus control, sleep hygiene, cognitive therapy, sleep restriction, relaxation techniques: NR<br><br>wait-list control; treatment as usual: NR                                                                        | 10              | NR                           | Hedges <i>g</i> [95% CI]:<br><b>0.29 [0.17, 0.42]</b> I-squared: 5.4%                           |
| Howell, 2014<br>Systematic<br>Review | Moderate         | Multi-component CBT - sleep hygiene, sleep restriction, stimulus control, cognitive restructuring, and relaxation therapies<br><br>usual care, wait-list control, healthy eating and nutrition, sleep education and hygiene only, no treatment | 2               | actigraphy                   | Non-significant change was identified between control and treatment groups for total sleep time |
| van Straten, 2009<br>Meta-analysis   | Moderate         | Total sample: 369<br>self-help CBT: stimulus-control; sleep restriction; cognitive therapy; sleep hygiene; relaxation; in-bed exercises: NR                                                                                                    | 3               | sleep diary                  | Cohen's <i>d</i> [95% CI]:<br>-0.05 [-0.40, 0.31] I-squared: 50.9%                              |
| Seyffert, 2016<br>Meta-analysis      | Low              | In-person CBT: NR<br>Internet-based CBT - sleep education, stimulus control, sleep restriction, relaxation, sleep hygiene, cognitive techniques: NR                                                                                            | 2               | sleep diary                  | Mean difference [95% CI]:<br>0.73 [-311.8, 313.3] I-squared: 75%                                |
| Wang, 2005<br>Systematic<br>Review   | Moderate         | In-person CBT: NR<br>CBT: stimulus control; sleep restriction; sleep hygiene education<br><br>Relaxation therapy<br><br>Total sample: 46                                                                                                       | 1               | sleep log<br>polysomnography | Change in outcome:<br>CBT: 352.1→372.4 mins;<br>relaxation: 352.1→337.9 mins                    |

| Author, Year<br>Synthesis type                               | AMSTAR<br>rating  | Intervention and sample size                                                                                                                                 | # of<br>studies                                                              | Measurement<br>method | Pooled Estimates (MA) or<br>Narrative Results (from SR with no MA)                  |
|--------------------------------------------------------------|-------------------|--------------------------------------------------------------------------------------------------------------------------------------------------------------|------------------------------------------------------------------------------|-----------------------|-------------------------------------------------------------------------------------|
| <i>Wake after sleep onset</i>                                |                   |                                                                                                                                                              |                                                                              |                       |                                                                                     |
| Brasure, 2015<br>Meta-analysis                               | High              | CBT-I: 412 [general adult population]                                                                                                                        | 11                                                                           | subjective report     | Mean difference [95% CI]:<br><b>-22.33 [-37.44, -7.21]</b> I-squared: 89%           |
|                                                              |                   | sham treatment/ placebo, wait-list control, no treatment, or sleep hygiene/sleep education): 420                                                             |                                                                              |                       |                                                                                     |
|                                                              |                   | CBT-I: 124 [older adults]                                                                                                                                    | 4                                                                            | subjective report     | Mean difference [95% CI]:<br><b>-26.96 [-35.73, -18.19]</b> I-squared: 0%           |
|                                                              |                   | placebo, wait-list control, no treatment, or sleep hygiene/sleep education: 96                                                                               |                                                                              |                       |                                                                                     |
| CBT-I: 61 [adults with chronic pain]                         | 3                 | subjective report                                                                                                                                            | Mean difference [95% CI]:<br><b>-38.18 [-65.57, -10.78]</b> I-squared: 0.82% |                       |                                                                                     |
| passive control (placebo or sham treatment or wait-list): 61 |                   |                                                                                                                                                              |                                                                              |                       |                                                                                     |
| Cheng, 2012<br>Meta-analysis                                 | Low               | CBT - sleep hygiene; stimulus control; relaxation training; sleep restriction; cognitive restructuring: NR                                                   | 4                                                                            | sleep diary           | Standardized mean difference [95% CI]:<br>-0.18 [-0.43, 0.06] I-squared: 55%        |
| Ho, 2016<br>Meta-analysis                                    | Low               | wait list control: NR                                                                                                                                        | 4                                                                            | sleep diary           | Standardized mean difference [95% CI]:<br><b>-1.02 [-1.32, -0.66]</b> I-squared: 0% |
|                                                              |                   | CBT - image rehearsal therapy; exposure, re-scripting and relaxation therapy; mind-body bridging; behavioural sleep intervention: NR                         |                                                                              |                       |                                                                                     |
| Irwin, 2006<br>Meta-analysis                                 | Critically<br>Low | wait list control; sleep hygiene: NR<br>CBT – relaxation, biofeedback, hypnosis, sleep compression/restriction, paradoxical intention: NR<br><br>control: NR | 15                                                                           | self-report           | Cohen's <i>d</i> [95% CI]:<br><b>-0.64 [-0.82, -0.47]</b> Q-statistic: 21.65        |

| Author, Year<br>Synthesis type       | AMSTAR<br>rating  | Intervention and sample size                                                                                                                                                                   | # of<br>studies | Measurement<br>method                                                                   | Pooled Estimates (MA) or<br>Narrative Results (from SR with no MA)                 |
|--------------------------------------|-------------------|------------------------------------------------------------------------------------------------------------------------------------------------------------------------------------------------|-----------------|-----------------------------------------------------------------------------------------|------------------------------------------------------------------------------------|
| Johnson, 2016<br>Meta-analysis       | Moderate          | CBT-I - with both cognitive and behavioral components: 423<br>waitlist control; treatment-as-usual; sleep education; behavioral placebo; mindfulness-based stress reduction: 297               | 8               | sleep diary                                                                             | Cohen's <i>d</i> [95% CI]:<br><b>0.29 [0.10 to 0.48]</b> I-squared: 30.1%          |
| Koffel, 2015<br>Meta-analysis        | Critically<br>Low | group CBT-I - stimulus control, sleep restriction, and addressing dysfunctional beliefs about sleep: NR<br>wait list, treatment as usual, placebo: NR                                          | 6               | sleep diary                                                                             | Mean effect size [95% CI]:<br><b>0.65 [0.26, 1.04]</b> I-squared: NR               |
| Montgomery, 2003<br>Meta-analysis    | High              | CBT - sleep hygiene; stimulus control; muscle relaxation; sleep restriction; cognitive therapy; education; imagery training: 95<br>wait-list control, placebo: 64                              | 4               | Sleep Diary                                                                             | Mean difference [95% CI]:<br><b>-21.84 [-37.30, -6.38]</b> I-squared: 55%          |
|                                      |                   | CBT -sleep hygiene; stimulus control; muscle relaxation; sleep restriction; cognitive therapy; education; imagery training: 30<br>wait-list control, placebo: 29                               | 2               | polysomnography                                                                         | Mean difference [95% CI]:<br><b>-24.36 [-41.14, -7.57]</b> I-squared: 0%           |
| Navarro-Bravo, 2015<br>Meta-analysis | Moderate          | CBT - sleep restriction, stimulus control, sleep education/hygiene: NR<br>placebo; wait list control; stress management and wellness training; treatment as usual; sleep hygiene/education: NR | 7               | sleep diary<br>polysomnography<br>actigraphy<br>sleep evaluation (4-item questionnaire) | Cohen's <i>d</i> [95% CI]:<br><b>-0.68 [-1.11, -0.26]</b> Chi square: 34.43; 0.000 |

| <b>Author, Year<br/>Synthesis type</b> | <b>AMSTAR<br/>rating</b> | <b>Intervention and sample size</b>                                                                                                                                                                                | <b># of<br/>studies</b> | <b>Measurement<br/>method</b>                                          | <b>Pooled Estimates (MA) or<br/>Narrative Results (from SR with no MA)</b>                                                                   |
|----------------------------------------|--------------------------|--------------------------------------------------------------------------------------------------------------------------------------------------------------------------------------------------------------------|-------------------------|------------------------------------------------------------------------|----------------------------------------------------------------------------------------------------------------------------------------------|
| Seyffert, 2016<br>Meta-analysis        | Low                      | Internet-based CBT -sleep education, stimulus control, sleep restriction, relaxation, sleep hygiene, cognitive techniques: NR                                                                                      | 6                       | Sleep diary                                                            | Mean difference [95% CI]:<br><b>-20.44 [-34.87, -6.01]</b> I-squared: 69.3%                                                                  |
|                                        |                          | wait-list control, Internet control, TAU: NR                                                                                                                                                                       |                         |                                                                        |                                                                                                                                              |
| van Straten, 2007<br>Meta-analysis     | Moderate                 | CBT - relaxation; sleep restriction; stimulus control; paradoxical intention; identifying and challenging dysfunctional thoughts: NR                                                                               | 71                      | sleep diary                                                            | Hedges <i>g</i> [95% CI]:<br><b>0.63 [0.53, 0.73]</b> I-squared: 60%                                                                         |
|                                        |                          | waitlist control; no treatment; placebo; psycho-education: NR                                                                                                                                                      |                         |                                                                        |                                                                                                                                              |
| van Straten, 2009<br>Meta-analysis     | Moderate                 | CBT -self-help: stimulus-control; sleep restriction; cognitive therapy; sleep hygiene; relaxation; in-bed exercises: NR                                                                                            | 6                       | sleep diary                                                            | Cohen's <i>d</i> [95% CI]:<br><b>0.3 [0.13, 0.48]</b> I-squared: 63.9%                                                                       |
|                                        |                          | waiting list: NR                                                                                                                                                                                                   |                         |                                                                        |                                                                                                                                              |
| Ye, 2016<br>Meta-analysis              | Moderate                 | CBT - sleep hygiene education; cognitive restructuring; stimulus control; sleep restriction; relaxation therapy; hierarchy development; imagery training; scheduled pseudo desensitization; breathing control: 828 | 11                      | sleep diary                                                            | Mean difference [95% CI]:<br><b>-22.31 [-31.11, -13.50]</b> I-squared: 76%                                                                   |
|                                        |                          | wait-list control, treatment as usual; internet + email; internet + telephone; telephone; internet-based control: 827                                                                                              |                         |                                                                        |                                                                                                                                              |
| Brooks, 2014<br>Systematic<br>Review   | Low                      | CBT-I: NR<br>Control NR: NR                                                                                                                                                                                        | 1                       | daily sleep diary;<br>Pittsburgh Sleep<br>Quality Index;<br>actigraphy | WASO improved in treatment group based on self-reported data and effect remained for 6 months post-treatment; not corroborated by actigraphy |

| Author, Year<br>Synthesis type          | AMSTAR<br>rating  | Intervention and sample size                                                                                                                                                            | # of<br>studies | Measurement<br>method        | Pooled Estimates (MA) or<br>Narrative Results (from SR with no MA)                                                                                                                                                                                                                                                    |
|-----------------------------------------|-------------------|-----------------------------------------------------------------------------------------------------------------------------------------------------------------------------------------|-----------------|------------------------------|-----------------------------------------------------------------------------------------------------------------------------------------------------------------------------------------------------------------------------------------------------------------------------------------------------------------------|
| Dickerson, 2014<br>Systematic<br>Review | High              | CBT(unspecified)                                                                                                                                                                        | 1               | Actigraphy                   | Change in outcome:<br>CBT vs placebo: <b>-0.50 [-0.89 to -0.1]</b><br>CBT showed a moderate effect in decreasing<br>insomnia symptoms compared to control                                                                                                                                                             |
|                                         |                   | usual treatment; waitlist crossover;<br>waitlist control; control; usual<br>treatment<br>Total sample: 150                                                                              |                 |                              |                                                                                                                                                                                                                                                                                                                       |
| Venables, 2014<br>Systematic<br>Review  | Critically<br>Low | CBT (unspecified): 12                                                                                                                                                                   | 1               | sleep diary                  | Change in outcome:<br>Pre/post scores<br>-1.18 [-2.45 to 0.62]                                                                                                                                                                                                                                                        |
|                                         |                   | No comparator (pre- post-<br>intervention)<br>group CBT: 660                                                                                                                            |                 |                              |                                                                                                                                                                                                                                                                                                                       |
|                                         |                   | No comparison<br>professionally administered CBT:<br>615                                                                                                                                | 8               | NR                           | 8 of 8 studies demonstrated improvement in<br>WASO (p-values not reported); results<br>demonstrate that group delivered CBT sessions<br>may be slightly more effective than individual<br>sessions                                                                                                                    |
| Wang, 2005<br>Systematic<br>Review      | Moderate          | No comparison                                                                                                                                                                           | 8               | actigraphy<br>sleep diary    | 8 of 8 studies in professionally administered CBT<br>reported an increase in WASO (p-values not<br>reported)                                                                                                                                                                                                          |
|                                         |                   | CBT - stimulus control; sleep<br>restriction; cognitive therapy; sleep<br>hygiene education; sleep scheduling                                                                           |                 |                              |                                                                                                                                                                                                                                                                                                                       |
| Ho, 2015<br>Meta-analysis               | Low               | control; Quasi desensitization; self-<br>monitoring control; sleep hygiene<br>recommendations; waiting-list<br>control<br>Total sample: 162                                             | 3               | polysomnography<br>sleep log | <b>significant improvement</b> in WASO for CBT<br>compared to placebo ( <b>p&lt;0.05</b> );<br>CBT group averaged a 52% reduction in WASO<br>from study entry to 3-month follow-up time<br>point; 60% of CBT group and none of control<br>group achieved the criterion for clinically<br>significant WASO improvement |
|                                         |                   | Multi-component CBT - stimulus<br>control, sleep restriction, sleep<br>hygiene, relaxation and/or cognitive<br>therapy: NR<br>waiting-list control; routine care or<br>no treatment: NR |                 |                              |                                                                                                                                                                                                                                                                                                                       |



| Author, Year<br>Synthesis type       | AMSTAR<br>rating  | Intervention and sample size                                                                                                                                                                                                                                           | # of<br>studies | Measurement<br>method     | Pooled Estimates (MA) or<br>Narrative Results (from SR with no MA)             |
|--------------------------------------|-------------------|------------------------------------------------------------------------------------------------------------------------------------------------------------------------------------------------------------------------------------------------------------------------|-----------------|---------------------------|--------------------------------------------------------------------------------|
| Okajima, 2011<br>Meta-analysis       | Critically<br>Low | Multi-component CBT - sleep hygiene education; sleep restriction; stimulus control; cognitive therapy; relaxation; paradoxical intention: NR<br><br>wait-list control, placebo; sleep hygiene education; control(unspecified); treatment as usual: NR                  | 6               | sleep diary               | Cohen's <i>d</i> [95% CI]:<br><b>0.34 [0.15, 0.52]</b> I-squared: NR           |
| Trauer, 2015<br>Meta-analysis        | Moderate          | Multi-component CBT - cognitive therapy, stimulus control, sleep restriction, relaxation, sleep hygiene: NR<br><br>Wait-list control, treatment as usual, Sleep hygiene, sham, placebo: NR                                                                             | 14              | Sleep diary               | Mean difference [95% CI]:<br>-26 [-36.52, 15.48] I-squared: 47.2%              |
| Zachariae, 2016<br>Meta-analysis     | Moderate          | Multi-component CBT -stimulus control, sleep hygiene, cognitive therapy, sleep restriction, relaxation techniques: NR<br><br>Wait-list control, treatment as usual: NR                                                                                                 | 7               | NR                        | Hedges <i>g</i> [95% CI]:<br><b>0.45 [0.25, 0.66]</b> I-squared: 48.5%         |
| Howell, 2014<br>Systematic<br>Review | Moderate          | Multi-component CBT -sleep hygiene, sleep restriction, stimulus control, cognitive restructuring, and relaxation therapies<br><br>usual care, wait-list control, healthy eating and nutrition, sleep education and hygiene only, no treatment<br><br>Total sample: 207 | 2               | actigraphy<br>sleep diary | 2 of 2 studies found <b>significant improvement</b> in WASO for undergoing CBT |

| Author, Year<br>Synthesis type        | AMSTAR<br>rating  | Intervention and sample size                                                                                           | # of<br>studies | Measurement<br>method                 | Pooled Estimates (MA) or<br>Narrative Results (from SR with no MA)                                                                                                                                                                                               |
|---------------------------------------|-------------------|------------------------------------------------------------------------------------------------------------------------|-----------------|---------------------------------------|------------------------------------------------------------------------------------------------------------------------------------------------------------------------------------------------------------------------------------------------------------------|
| McCurry, 2007<br>Systematic<br>Review | Critically<br>Low | Multi-component CBT -sleep hygiene, relaxation, sleep compression, cognitive behavioural therapy, stimulus control     | 3               | sleep logs                            | CBT <b>significantly improved</b> WASO compared to stress management and wait-list control                                                                                                                                                                       |
|                                       |                   | delayed treatment, wait-list control, placebo; stress management:<br>Total sample: 154                                 |                 |                                       |                                                                                                                                                                                                                                                                  |
| van Straten, 2009<br>Meta-analysis    | Moderate          | Multi-component CBT -sleep restriction, education, stimulus control: 4                                                 | 1               | Sleep logs<br>sleep assessment device | Effect size (p-value): 1.12 (NR)<br>Large effect size supports the effectiveness of CBT to improve WASO (p-values not reported)                                                                                                                                  |
|                                       |                   | No comparator (pre- post-intervention)                                                                                 |                 |                                       |                                                                                                                                                                                                                                                                  |
| Wang, 2005<br>Systematic<br>Review    | Moderate          | self-help CBT: stimulus-control; sleep restriction; cognitive therapy; sleep hygiene; relaxation; in-bed exercises: NR | 3               | sleep diary                           | Cohen's <i>d</i> [95% CI]:<br>-0.03 [-0.32, 0.38] I-squared: 44.5%                                                                                                                                                                                               |
|                                       |                   | In-person CBT: NR                                                                                                      |                 |                                       |                                                                                                                                                                                                                                                                  |
| McCurry, 2007<br>Systematic<br>Review | Critically<br>Low | CBT - stimulus control; sleep restriction; sleep hygiene education                                                     | 1               | polysomnography<br>sleep log          | Change in outcome:<br>CBT: 50.8→30.1minutes<br>relaxation: 50.8→50.6minutes<br><b>Significant improvement</b> in WASO for CBT compared to relaxation therapy; CBT recipients reported a 54% reduction whereas relaxation group reported 16% ( <b>p&lt;0.01</b> ) |
|                                       |                   | Relaxation therapy<br>Total sample: 46                                                                                 |                 |                                       |                                                                                                                                                                                                                                                                  |
| McCurry, 2007<br>Systematic<br>Review | Critically<br>Low | CBT (unspecified)<br>CBT (unspecified) + Temazepam<br>Total sample: 78                                                 | 1               | sleep logs                            | CBT and CBT + temazepam groups both showed <b>significant improvement</b> compared to placebo                                                                                                                                                                    |

| Author, Year<br>Synthesis type | AMSTAR<br>rating  | Intervention and sample size                                                                                                                                                 | # of<br>studies | Measurement<br>method             | Pooled Estimates (MA) or<br>Narrative Results (from SR with no MA)                   |
|--------------------------------|-------------------|------------------------------------------------------------------------------------------------------------------------------------------------------------------------------|-----------------|-----------------------------------|--------------------------------------------------------------------------------------|
| Buscemi, 2005<br>Meta-analysis | High              | CBT + relaxation technique -<br>relaxation training; cognitive control;<br>stimulus control; group relaxation;<br>aggressive muscle relaxation;<br>cognitive distraction: 23 | 2               | NR                                | Mean difference [95% CI]:<br>-7.6 [-26.3, 11.1] I-squared: 0%                        |
|                                |                   | placebo: 26                                                                                                                                                                  |                 |                                   |                                                                                      |
|                                |                   | Multi-component CBT; Paradoxical<br>Intention; Sleep compression;<br>Stimulus control:128                                                                                    | 8               | sleep diary                       | Mean difference [95% CI]:<br><b>-18.17 [-30.37, -5.98]</b> I-squared: 52.9%          |
|                                |                   | Placebo: 120                                                                                                                                                                 |                 |                                   |                                                                                      |
|                                |                   | CBT + relaxation - relaxation<br>training; stimulus control; aggressive<br>muscle relaxation; cognitive<br>distraction: 23                                                   | 2               | NR                                | Mean difference [95% CI]:<br>5.1 [-12.0, 22.2] I-squared: 0%                         |
|                                |                   | CBT - cognitive therapy; sleep<br>restriction; stimulus control; sleep<br>hygiene: 24                                                                                        |                 |                                   |                                                                                      |
| <i>Sleep Quality</i>           |                   |                                                                                                                                                                              |                 |                                   |                                                                                      |
| Brasure, 2015<br>Meta-analysis | High              | CBT-I: 296<br>sham treatment/ placebo, wait-list<br>control, no treatment, or sleep<br>hygiene/sleep education): 284                                                         | 6               | Pittsburgh Sleep<br>Quality Index | Mean difference [95% CI]:<br><b>-2.1 [-2.87, -1.34]</b> I-squared: 37%               |
| Ho, 2016<br>Meta-analysis      | Low               | CBT - image rehearsal therapy;<br>exposure, re-scripting and relaxation<br>therapy; mind-body bridging;<br>behavioural sleep intervention: NR                                | 6               | Pittsburgh sleep<br>quality index | Standardized mean difference [95% CI]:<br><b>-0.87 [-1.18, -0.56]</b> I-squared: 33% |
|                                |                   | wait list control; sleep hygiene: NR                                                                                                                                         |                 |                                   |                                                                                      |
| Irwin, 2006<br>Meta-analysis   | Critically<br>Low | CBT – relaxation, biofeedback,<br>hypnosis, sleep<br>compression/restriction, paradoxical<br>intention: NR                                                                   | 7               | self-report                       | Cohen's <i>d</i> [95% CI]:<br><b>0.76 [0.48 to 1.03]</b> Q-statistic: 7.92           |
|                                |                   | control: NR                                                                                                                                                                  |                 |                                   |                                                                                      |

| Author, Year<br>Synthesis type       | AMSTAR<br>rating  | Intervention and sample size                                                                                                                                                                              | # of<br>studies | Measurement<br>method                                                   | Pooled Estimates (MA) or<br>Narrative Results (from SR with no MA)                                                                              |
|--------------------------------------|-------------------|-----------------------------------------------------------------------------------------------------------------------------------------------------------------------------------------------------------|-----------------|-------------------------------------------------------------------------|-------------------------------------------------------------------------------------------------------------------------------------------------|
| Koffel, 2015<br>Meta-analysis        | Critically<br>Low | group CBT-I - stimulus control, sleep restriction, and addressing dysfunctional beliefs about sleep: NR<br><br>wait list, treatment as usual, placebo: NR                                                 | 5               | Sleep Diary, Sleep Quality Measures                                     | Mean effect size [95% CI]:<br>0.4 [-0.14, 0.93] I-squared: NR                                                                                   |
| Navarro-Bravo, 2015<br>Meta-analysis | Moderate          | CBT - sleep restriction, stimulus control, sleep education/hygiene: NR<br><br>placebo; wait list control; stress management and wellness training; treatment as usual; sleep hygiene/education: NR        | 5               | Pittsburgh Sleep Quality Index                                          | Cohen's <i>d</i> [95% CI]:<br><b>-0.59 [-0.59, -0.85]</b> Chi square: 6.85; 0.144                                                               |
| Tang, 2015<br>Meta-analysis          | Moderate          | CBT-I: psychoeducation, sleep hygiene, stimulus control, sleep restriction, cognitive therapy, and relaxation: 510<br><br>waitlist, treatment as usual: 455                                               | 11              | Pittsburgh Sleep Quality Index (PSQI);<br>Insomnia Severity Index (ISI) | Standardized mean difference [95% CI]:<br><b>0.78 [0.42, 1.13]</b><br>I-squared: 84%                                                            |
| van Straten, 2007<br>Meta-analysis   | Low               | CBT - relaxation; sleep restriction; stimulus control; paradoxical intention; identifying and challenging dysfunctional thoughts: NR<br><br>waitlist control; no treatment; placebo; psycho-education: NR | 19<br><br>40    | Pittsburgh sleep quality index<br><br>sleep diary                       | Hedges <i>g</i> [95% CI]:<br><b>0.65 [0.51, 0.79]</b> I-squared: 39%<br><br>Hedges <i>g</i> [95% CI]:<br><b>0.4 [0.24, 0.56]</b> I-squared: 74% |
| van Straten, 2009<br>Meta-analysis   | Moderate          | CBT -self-help: stimulus-control; sleep restriction; cognitive therapy; sleep hygiene; relaxation; in-bed exercises: NR<br><br>waiting list: NR                                                           | 7               | sleep diary                                                             | Cohen's <i>d</i> [95% CI]:<br><b>0.21 [0.06, 0.35]</b> I-squared: 52.3%                                                                         |
| Cheng, 2012<br>Meta-analysis         | Low               | sleep hygiene; stimulus control; relaxation training; sleep restriction; cognitive restructuring: NR<br><br>wait list control: NR                                                                         | 4               | Pittsburgh sleep quality index                                          | Standardized mean difference [95% CI]:<br><b>0.41 [0.16, 0.65]</b> I-squared: 45%                                                               |

| <b>Author, Year<br/>Synthesis type</b> | <b>AMSTAR<br/>rating</b> | <b>Intervention and sample size</b>                                                                                                                                                                                                                                | <b># of<br/>studies</b> | <b>Measurement<br/>method</b>     | <b>Pooled Estimates (MA) or<br/>Narrative Results (from SR with no MA)</b>                                                                                                                                                           |
|----------------------------------------|--------------------------|--------------------------------------------------------------------------------------------------------------------------------------------------------------------------------------------------------------------------------------------------------------------|-------------------------|-----------------------------------|--------------------------------------------------------------------------------------------------------------------------------------------------------------------------------------------------------------------------------------|
| Bogdanov, 2017<br>Systematic<br>Review | Low                      | CBT (unspecified)<br>Control (unspecified)<br>Total sample: 3                                                                                                                                                                                                      | 1                       | Pittsburgh sleep<br>quality index | No clinically meaningful improvement in either<br>group                                                                                                                                                                              |
| Venables, 2014<br>Systematic<br>Review | Critically<br>Low        | professionally administered CBT:<br>215<br>No comparator (pre- post-<br>intervention)                                                                                                                                                                              | 2                       | Pittsburgh sleep<br>quality index | Change in outcome [mean change (%)]:<br>7.3 (37.6)<br>2 of 2 studies found a reduction in PSQI scores<br>(p-values not reported); neither of the scores<br>decreased to below 5.0, above which is a<br>diagnostic score for insomnia |
| Ho, 2015<br>Meta-analysis              | Low                      | Multi-component CBT - stimulus<br>control, sleep restriction, sleep<br>hygiene, relaxation and/or cognitive<br>therapy: NR<br>waiting-list control; routine care or<br>no treatment: NR                                                                            | 4                       | sleep diary                       | Hedges <i>g</i> [95% CI]:<br><b>0.43 [0.2, 0.6]</b> I-squared: 0%                                                                                                                                                                    |
| Okajima, 2011<br>Meta-analysis         | Critically<br>Low        | Multi-component CBT –sleep<br>hygiene education; sleep restriction;<br>stimulus control; cognitive therapy;<br>relaxation; paradoxical intention: NR<br>wait-list control, placebo; sleep<br>hygiene education;<br>control(unspecified); treatment as<br>usual: NR | 2                       | Pittsburgh Sleep<br>Quality Index | Cohen’s <i>d</i> [95% CI]:<br><b>0.77 [0.48, 0.97]</b> I-squared: NR                                                                                                                                                                 |
| Zachariae, 2016<br>Meta-analysis       | Moderate                 | Multi-component CBT –stimulus<br>control, sleep hygiene, cognitive<br>therapy, sleep restriction, relaxation<br>techniques: NR<br>Wait-list control, treatment as usual:<br>NR                                                                                     | 8                       | NR                                | Hedges <i>g</i> [95% CI]:<br><b>0.49 [0.30, 0.68]</b> I-squared: 34.5%                                                                                                                                                               |

| Author, Year<br>Synthesis type        | AMSTAR<br>rating  | Intervention and sample size                                                                                                                                                                                                                                           | # of<br>studies | Measurement<br>method                                                                                               | Pooled Estimates (MA) or<br>Narrative Results (from SR with no MA)                                                                                                   |
|---------------------------------------|-------------------|------------------------------------------------------------------------------------------------------------------------------------------------------------------------------------------------------------------------------------------------------------------------|-----------------|---------------------------------------------------------------------------------------------------------------------|----------------------------------------------------------------------------------------------------------------------------------------------------------------------|
| Howell, 2014<br>Systematic<br>Review  | Moderate          | Multi-component CBT –sleep hygiene, sleep restriction, stimulus control, cognitive restructuring, and relaxation therapies<br><br>usual care, wait-list control, healthy eating and nutrition, sleep education and hygiene only, no treatment<br><br>Total sample: 233 | 2               | actigraphy<br>sleep diary                                                                                           | <b>Significant improvement</b> in all studies post CBT intervention identified for sleep quality (p-values not reported)                                             |
| McCurry, 2007<br>Systematic<br>Review | Critically<br>Low | Multi-component CBT –sleep hygiene, relaxation, sleep compression, cognitive behavioural therapy, stimulus control<br><br>delayed treatment, wait-list control, placebo; stress management:<br><br>Total sample: 210                                                   | 4               | sleep logs<br>Pittsburgh sleep<br>quality index                                                                     | <b>Significant improvement</b> in sleep quality ratings compared to control                                                                                          |
| Buscemi, 2005<br>Meta-analysis        | High              | CBT + relaxation - relaxation training; cognitive control; stimulus control; group relaxation; aggressive muscle relaxation; cognitive distraction: 23<br><br>placebo: 26                                                                                              | 2               | NR                                                                                                                  | Mean difference [95% CI]:<br>0.69 [-0.34, 1.73] I-squared: 65.4%                                                                                                     |
| Yang, 2014<br>Meta-analysis           | Moderate          | CBT + relaxation - CBT; sleep hygiene; relaxation CD: 93<br><br>Sleep hygiene education; treatment as usual: 91<br><br>CBT + relaxation - CBT; sleep hygiene; relaxation CD: 56<br><br>Sleep hygiene education; treatment as usual: 56                                 | 3<br><br>2      | global Pittsburgh<br>sleep quality index<br><br>subjective sleep<br>quality in<br>Pittsburgh Sleep<br>Quality Index | Standardized mean difference [95% CI]:<br><b>0.85 [0.37, 1.34]</b> I-squared: 56%<br><br>Standardized mean difference [95% CI]:<br>0.44 [-0.28, 1.17] I-squared: 64% |

| Author, Year<br>Synthesis type     | AMSTAR<br>rating | Intervention and sample size                                                                                                                                                                                                                                | # of<br>studies | Measurement<br>method                                                                                                               | Pooled Estimates (MA) or<br>Narrative Results (from SR with no MA)                                                                                                                                                               |
|------------------------------------|------------------|-------------------------------------------------------------------------------------------------------------------------------------------------------------------------------------------------------------------------------------------------------------|-----------------|-------------------------------------------------------------------------------------------------------------------------------------|----------------------------------------------------------------------------------------------------------------------------------------------------------------------------------------------------------------------------------|
| van Straten, 2009<br>Meta-analysis | Moderate         | self-help CBT: stimulus-control;<br>sleep restriction; cognitive therapy;<br>sleep hygiene; relaxation; in-bed<br>exercises: NR                                                                                                                             | 2               | sleep diary                                                                                                                         | Cohen's <i>d</i> [95% CI]:<br>-0.5 [-0.90, 0.02] I-squared: 0%                                                                                                                                                                   |
| Buscemi, 2005<br>Meta-analysis     | High             | In-person CBT: NR<br>CBT + relaxation - relaxation<br>training; stimulus control; aggressive<br>muscle relaxation; cognitive<br>distraction: 23<br>CBT - cognitive therapy; sleep<br>restriction; stimulus control; sleep<br>hygiene: 24                    | 2               | NR                                                                                                                                  | Mean difference [95% CI]:<br>0.2 [-0.38, 0.77] I-squared: 0%                                                                                                                                                                     |
| <i>Sleep Satisfaction</i>          |                  |                                                                                                                                                                                                                                                             |                 |                                                                                                                                     |                                                                                                                                                                                                                                  |
| Wang, 2005<br>Systematic<br>Review | Moderate         | CBT - stimulus control; sleep<br>restriction; cognitive therapy; sleep<br>hygiene education; sleep scheduling<br>control; Quasi desensitization; self-<br>monitoring control; sleep hygiene<br>recommendations; waiting-list<br>control<br>Total sample: 81 | 2               | Dysfunctional<br>attitudes and<br>Beliefs about Sleep<br>(DBAS)<br>evaluation; The<br>Beliefs and<br>Attitudes about<br>Sleep Scale | CBT provided greater improvements in DBAS<br>scores than did placebo, CBT endorsed less<br>dysfunctional beliefs and attitudes about sleep<br>than the placebo group; <b>significantly greater<br/>improvement</b> in BAS scores |
| <i>Sleep efficiency</i>            |                  |                                                                                                                                                                                                                                                             |                 |                                                                                                                                     |                                                                                                                                                                                                                                  |
| Cheng, 2012<br>Meta-analysis       | Low              | CBT - sleep hygiene; stimulus<br>control; relaxation training; sleep<br>restriction; cognitive restructuring:<br>NR<br>wait list control: NR                                                                                                                | 4               | sleep diary                                                                                                                         | Standardized mean difference [95% CI]:<br><b>0.4 [0.15, 0.64]</b> I-squared: 63%                                                                                                                                                 |
| Ho, 2016<br>Meta-analysis          | Low              | CBT - image rehearsal therapy;<br>exposure, re-scripting and relaxation<br>therapy; mind-body bridging;<br>behavioural sleep intervention: NR<br>wait list control; sleep hygiene: NR                                                                       | 5               | sleep diary                                                                                                                         | Standardized mean difference [95% CI]:<br><b>1.15 [0.75, 1.56]</b> I-squared: 37%                                                                                                                                                |

| Author, Year<br>Synthesis type       | AMSTAR<br>rating  | Intervention and sample size                                                                                                                                                                                                                                                                                                                                                                                                                                     | # of<br>studies | Measurement<br>method              | Pooled Estimates (MA) or<br>Narrative Results (from SR with no MA)                                                                              |
|--------------------------------------|-------------------|------------------------------------------------------------------------------------------------------------------------------------------------------------------------------------------------------------------------------------------------------------------------------------------------------------------------------------------------------------------------------------------------------------------------------------------------------------------|-----------------|------------------------------------|-------------------------------------------------------------------------------------------------------------------------------------------------|
| Irwin, 2006<br>Meta-analysis         | Critically<br>Low | CBT – relaxation, biofeedback,<br>hypnosis, sleep<br>compression/restriction, paradoxical<br>intention: NR<br><br>control: NR                                                                                                                                                                                                                                                                                                                                    | 8               | self-report                        | Cohen's <i>d</i> [95% CI]:<br><b>0.52 [0.28 to 0.75]</b> Q-statistic: 47.85                                                                     |
| Johnson, 2016<br>Meta-analysis       | Moderate          | CBT-I with both cognitive and<br>behavioral components: 423<br><br>waitlist control; treatment-as-usual;<br>sleep education; behavioral placebo;<br>mindfulness-based stress reduction:<br>297                                                                                                                                                                                                                                                                   | 8               | sleep diary                        | Cohen's <i>d</i> [95% CI]:<br><b>0.33 [0.11 to 0.54]</b> I-squared: 41.1%                                                                       |
| Koffel, 2015<br>Meta-analysis        | Critically<br>Low | group CBT-I - stimulus control, sleep<br>restriction, and addressing<br>dysfunctional beliefs about sleep: NR<br><br>wait list, treatment as usual, placebo:<br>NR                                                                                                                                                                                                                                                                                               | 6               | sleep diary                        | Mean effect size [95% CI]:<br><b>0.84 [0.38, 1.31]</b> I-squared: NR                                                                            |
| Montgomery,<br>2003<br>Meta-analysis | High              | CBT - cognitive-behavioural therapy<br>(unspecified); sleep hygiene;<br>stimulus control; muscle relaxation;<br>sleep restriction; cognitive therapy;<br>education; imagery training: 86<br><br>wait-list control, placebo: 57<br>CBT - cognitive-behavioural therapy<br>(unspecified); sleep hygiene;<br>stimulus control; muscle relaxation;<br>sleep restriction; cognitive therapy;<br>education; imagery training: 30<br><br>wait-list control, placebo: 29 | 3<br><br>2      | sleep diary<br><br>polysomnography | Mean difference [95% CI]:<br>-7.49 [-15.45, 0.47] I-squared: 77%<br><br>Mean difference [95% CI]:<br><b>-6.25 [-10.18, -2.31]</b> I-squared: 0% |



| <b>Author, Year<br/>Synthesis type</b>  | <b>AMSTAR<br/>rating</b> | <b>Intervention and sample size</b>                                                                                                                                                                   | <b># of<br/>studies</b> | <b>Measurement<br/>method</b>                                                           | <b>Pooled Estimates (MA) or<br/>Narrative Results (from SR with no MA)</b>      |
|-----------------------------------------|--------------------------|-------------------------------------------------------------------------------------------------------------------------------------------------------------------------------------------------------|-------------------------|-----------------------------------------------------------------------------------------|---------------------------------------------------------------------------------|
| Navarro-Bravo,<br>2015<br>Meta-analysis | Moderate                 | CBT - sleep restriction, stimulus control, sleep education/hygiene: NR<br>placebo; wait list control; stress management and wellness training; treatment as usual; sleep hygiene/education: NR        | 8                       | sleep diary<br>polysomnography<br>actigraphy<br>sleep evaluation (4-item questionnaire) | Cohen's <i>d</i> [95% CI]:<br><b>0.78 [0.34, 1.21]</b> Chi square: 47.56; 0.000 |
| Seyffert, 2016<br>Meta-analysis         | Low                      | Internet-based CBT - sleep education, stimulus control, sleep restriction, relaxation, sleep hygiene, cognitive techniques: NR<br>Wait-list control, Internet control, treatment as usual: NR         | 9                       | Sleep diary                                                                             | Mean difference [95% CI]:<br><b>7.22 [5.13, 9.32]</b> I-squared: 39.5%          |
| van Straten, 2007<br>Meta-analysis      | Low                      | CBT - relaxation; sleep restriction; stimulus control; paradoxical intention; identifying and challenging dysfunctional thoughts: NR<br>waitlist control; no treatment; placebo; psycho-education: NR | 79                      | sleep diary                                                                             | Hedges <i>g</i> [95% CI]:<br><b>0.71 [0.61, 0.82]</b> I-squared: 70%            |
| van Straten, 2009<br>Meta-analysis      | Moderate                 | CBT - self-help: stimulus-control; sleep restriction; cognitive therapy; sleep hygiene; relaxation; in-bed exercises: NR<br>waiting list: NR                                                          | 7                       | sleep diary                                                                             | Cohen's <i>d</i> [95% CI]:<br><b>0.26 [0.11, 0.40]</b> I-squared: 65.5%         |

| Author, Year<br>Synthesis type          | AMSTAR<br>rating | Intervention and sample size                                                                                                                                                                                                          | # of<br>studies | Measurement<br>method                                                                     | Pooled Estimates (MA) or<br>Narrative Results (from SR with no MA)                                                                                                                                      |
|-----------------------------------------|------------------|---------------------------------------------------------------------------------------------------------------------------------------------------------------------------------------------------------------------------------------|-----------------|-------------------------------------------------------------------------------------------|---------------------------------------------------------------------------------------------------------------------------------------------------------------------------------------------------------|
| Ye, 2016<br>Meta-analysis               | Moderate         | CBT - sleep hygiene education;<br>cognitive restructuring; stimulus<br>control; sleep restriction; relaxation<br>therapy; hierarchy development;<br>imagery training; scheduled pseudo<br>desensitization; breathing control:<br>1006 | 15              | sleep diary                                                                               | Mean difference [95% CI]:<br><b>9.58 [7.30, 11.85]</b> I-squared: 76%                                                                                                                                   |
| Bogdanov, 2017<br>Systematic<br>Review  | Low              | wait-list control, treatment as usual;<br>internet + email; internet +<br>telephone; telephone; internet-based<br>control: 1003<br>CBT (unspecified)<br>Control (unspecified)<br>Total sample: 11                                     | 1               | sleep diary                                                                               | <b>Significant improvement</b> in sleep efficiency<br>compared to control ( <b>p=0.01</b> )                                                                                                             |
| Brooks, 2014<br>Systematic<br>Review    | Low              | CBT-I: 7<br>No comparator (pre- post-<br>intervention)<br>CBT-I (unspecified): NR<br>Control (unspecified): NR                                                                                                                        | 1<br>2          | daily sleep diary<br>daily sleep diary<br>Pittsburgh Sleep<br>Quality Index<br>actigraphy | Improvement in sleep efficiency (p-values not<br>reported)<br>Self-reported sleep efficiency improved in<br>treatment group; maintained for 6 months post-<br>treatment; not corroborated by actigraphy |
| Dickerson, 2014<br>Systematic<br>Review | High             | CBT (unspecified): 12<br>No comparator (pre- post-<br>intervention)                                                                                                                                                                   | 1               | sleep diary                                                                               | Change in outcome:<br>Pre-/post scores <b>1.49 [0.88 to 2.79]</b><br>Sleep efficiency improved over baseline at weeks<br>4 and 8                                                                        |
| Ishak, 2012<br>Systematic<br>Review     | Low              | CBT (unspecified)<br>placebo, no treatment, usual care<br>Total sample: 209                                                                                                                                                           | 1               | SF-36; CIS-20;<br>GHQ; PANAS;<br>FACT-G                                                   | <b>Significant improvements</b> in sleep efficiency at<br>both 3 and 6-month follow-up ( <b>p&lt;0.01</b> )                                                                                             |

| Author, Year<br>Synthesis type         | AMSTAR<br>rating  | Intervention and sample size                                                                                                                                                                                           | # of<br>studies | Measurement<br>method                                | Pooled Estimates (MA) or<br>Narrative Results (from SR with no MA)                                                                                                                                                                                             |
|----------------------------------------|-------------------|------------------------------------------------------------------------------------------------------------------------------------------------------------------------------------------------------------------------|-----------------|------------------------------------------------------|----------------------------------------------------------------------------------------------------------------------------------------------------------------------------------------------------------------------------------------------------------------|
| Wang, 2005<br>Systematic<br>Review     | Moderate          | CBT - stimulus control; sleep restriction; cognitive therapy; sleep hygiene education; sleep scheduling control; Quasi desensitization; self-monitoring control; sleep hygiene recommendations; waiting-list control   | 4               | sleep diary/log polysomnography structured interview | 4 of 4 studies found improvement in sleep efficiency compared to control; only 2 of 4 were <b>statistically significant</b>                                                                                                                                    |
| Taylor, 2014<br>Systematic<br>Review   | Critically<br>Low | Total sample: 128<br>CBT - stimulus control, sleep restriction, relaxation therapy, cognitive therapy; image rehearsal therapy; medication withdrawal: NR<br>wait list, usual care, sleep hygiene, placebo control: NR | 13              | sleep diaries                                        | Mean effect size [95% CI; p-value]:<br><b>0.758 [0.557, 0.958; p&lt;0.01]</b><br>CBT-I results in <b>significant improvement</b> in sleep efficiency in patients with co-morbid psychiatric disorders, medium to large effects were homogeneous across studies |
| Venables, 2014<br>Systematic<br>Review | Critically<br>Low | group CBT: 660<br>No comparator (pre- post-intervention)                                                                                                                                                               | 8               | NR                                                   | 8 of 8 studies obtained improvements in sleep quality, results demonstrate that group delivered CBT sessions may be slightly more effective than individual sessions                                                                                           |
|                                        |                   | professionally administered CBT: 615<br>No comparator (pre- post-intervention)                                                                                                                                         | 8               | actigraphy<br>sleep diary                            | 8 of 8 studies found a <b>significant improvement</b> in sleep efficiency (p-values not reported)                                                                                                                                                              |
| Ho, 2015<br>Meta-analysis              | Low               | Multi-component CBT - stimulus control, sleep restriction, sleep hygiene, relaxation and/or cognitive therapy: NR<br>waiting-list control; routine care or no treatment: NR                                            | 7               | sleep diary                                          | Hedges g [95% CI]:<br><b>0.79 [0.2, 1.4]</b> I-squared: 92%                                                                                                                                                                                                    |
| Okajima, 2011<br>Meta-analysis         | Critically<br>Low | Multi-component CBT - sleep hygiene education; sleep restriction;                                                                                                                                                      | 8               | sleep diary                                          | Cohen's d [95% CI]:<br><b>0.43 [0.25, 0.59]</b> I-squared: NR                                                                                                                                                                                                  |

| Author, Year<br>Synthesis type       | AMSTAR<br>rating | Intervention and sample size                                                                                                         | # of<br>studies | Measurement<br>method         | Pooled Estimates (MA) or<br>Narrative Results (from SR with no MA)                             |
|--------------------------------------|------------------|--------------------------------------------------------------------------------------------------------------------------------------|-----------------|-------------------------------|------------------------------------------------------------------------------------------------|
|                                      |                  | stimulus control; cognitive therapy;<br>relaxation; paradoxical intention: NR                                                        |                 |                               |                                                                                                |
|                                      |                  | wait-list control, placebo; sleep<br>hygiene education;<br>control(unspecified); treatment as<br>usual: NR                           | 2               | polysomnography<br>actigraphy | Cohen's <i>d</i> [95% CI]:<br><b>0.78 [0.27, 1.17]</b><br>I-squared: NR                        |
| Trauer, 2015<br>Meta-analysis        | Moderate         | Multi-component CBT - cognitive<br>therapy, stimulus control, sleep<br>restriction, relaxation, sleep hygiene:<br>NR                 | 17              | Sleep diary                   | Mean difference [95% CI]:<br><b>9.91 [8.09, 11.73]</b> I-squared: 47.1%                        |
|                                      |                  | Wait-list control, treatment as usual,<br>Sleep hygiene, sham, placebo: NR                                                           |                 |                               |                                                                                                |
| Zachariae, 2016<br>Meta-analysis     | Moderate         | Multi-component CBT - stimulus<br>control, sleep hygiene, cognitive<br>therapy, sleep restriction, relaxation<br>techniques: NR      | 10              | NR                            | Hedges <i>g</i> [95% CI]:<br><b>0.58 [0.36, 0.81]</b> I-squared: 68.4%                         |
|                                      |                  | Wait-list control, treatment as usual:<br>NR                                                                                         |                 |                               |                                                                                                |
| Howell, 2014<br>Systematic<br>Review | Moderate         | Multi-component CBT - sleep<br>hygiene, sleep restriction, stimulus<br>control, cognitive restructuring, and<br>relaxation therapies | 1               | SF-36                         | Sleep efficiency <b>increased</b> in all studies post<br>CBT intervention ( <b>p&lt;0.01</b> ) |
|                                      |                  | usual care, wait-list control, healthy<br>eating and nutrition, sleep education<br>and hygiene only, no treatment                    |                 |                               |                                                                                                |
|                                      |                  | Total sample: 209                                                                                                                    |                 |                               |                                                                                                |

| Author, Year<br>Synthesis type        | AMSTAR<br>rating  | Intervention and sample size                                                                                                                                                                                          | # of<br>studies | Measurement<br>method         | Pooled Estimates (MA) or<br>Narrative Results (from SR with no MA)                             |
|---------------------------------------|-------------------|-----------------------------------------------------------------------------------------------------------------------------------------------------------------------------------------------------------------------|-----------------|-------------------------------|------------------------------------------------------------------------------------------------|
| McCurry, 2007<br>Systematic<br>Review | Critically<br>Low | Multi-component CBT - sleep hygiene, relaxation, sleep compression, cognitive behavioural therapy, stimulus control<br><br>delayed treatment, wait-list control, placebo; stress management:<br><br>Total sample: 154 | 3               | sleep logs                    | CBT group had <b>significant improvement</b> in sleep efficiency compared to stress management |
| van Straten, 2009<br>Meta-analysis    | Moderate          | self-help CBT: stimulus-control; sleep restriction; cognitive therapy; sleep hygiene; relaxation; in-bed exercises: NR<br><br>In-person CBT: NR                                                                       | 3               | sleep diary                   | Cohen's <i>d</i> [95% CI]:<br>-0.29 [-0.65, 0.06] I-squared: 22.4%                             |
| Seyffert, 2016<br>Meta-analysis       | Low               | Internet-based CBT - sleep education, stimulus control, sleep restriction, relaxation, sleep hygiene, cognitive techniques: NR<br><br>In-person CBT: NR                                                               | 2               | Sleep diary                   | Mean difference [95% CI]:<br>-1.21 [-49.0, 46.6] I-squared: 59.7%                              |
| Wang, 2005<br>Systematic<br>Review    | Moderate          | CBT - stimulus control; sleep restriction; sleep hygiene education<br><br>CBT + relaxation therapy<br><br>Total sample: 46                                                                                            | 1               | polysomnography<br>sleep log  | Change in outcome:<br>CBT: 77.8%→85.5%;<br>relaxation: 77.8%→78.1%                             |
| McCurry, 2007<br>Systematic<br>Review | Critically<br>Low | CBT + Temazepam<br>CBT<br><br>Total sample: 78                                                                                                                                                                        | 1               | polysomnography<br>sleep logs | The combination of CBT + temazepam was <b>significantly more effective</b> than placebo        |
| <i>Insomnia Severity Index</i>        |                   |                                                                                                                                                                                                                       |                 |                               |                                                                                                |
| Brasure, 2015<br>Meta-analysis        | High              | CBT-I: 172<br><br>sham treatment/ placebo, wait-list control, no treatment, or sleep hygiene/sleep education): 173                                                                                                    | 5               | ISI                           | Mean difference [95% CI]:<br><b>-5.15 [-7.13, -3.16]</b> I-squared: 67%                        |

| Author, Year<br>Synthesis type          | AMSTAR<br>rating | Intervention and sample size                                                                                                                                                             | # of<br>studies | Measurement<br>method | Pooled Estimates (MA) or<br>Narrative Results (from SR with no MA)                   |
|-----------------------------------------|------------------|------------------------------------------------------------------------------------------------------------------------------------------------------------------------------------------|-----------------|-----------------------|--------------------------------------------------------------------------------------|
|                                         |                  | CBT-I: 68<br>passive control (placebo or sham<br>treatment or wait-list): 63                                                                                                             | 4               | ISI                   | Mean difference [95% CI]:<br><b>-7.1 [-12.87, -1.32]</b> I-squared: 89%              |
| Cheng, 2012<br>Meta-analysis            | Low              | CBT - sleep hygiene; stimulus<br>control; relaxation training; sleep<br>restriction; cognitive restructuring:<br>NR                                                                      | 2               | ISI                   | Standardized mean difference [95% CI]:<br><b>-0.86 [-1.18, -0.53]</b> I-squared: 0%  |
|                                         |                  | wait list control: NR                                                                                                                                                                    |                 |                       |                                                                                      |
| Ho, 2016<br>Meta-analysis               | Low              | CBT - image rehearsal therapy;<br>exposure, re-scripting and relaxation<br>therapy; mind-body bridging;<br>behavioural sleep intervention: NR                                            | 5               | ISI                   | Standardized mean difference [95% CI]:<br><b>-1.15 [-1.81, -0.49]</b> I-squared: 77% |
|                                         |                  | wait list control; sleep hygiene: NR                                                                                                                                                     |                 |                       |                                                                                      |
| Johnson, 2016<br>Meta-analysis          | Moderate         | CBT-I with both cognitive and<br>behavioral components: NR<br>waitlist control; treatment-as-usual;<br>sleep education; behavioral placebo;<br>mindfulness-based stress reduction:<br>NR | 4               | ISI                   | Cohen's <i>d</i> [95% CI]:<br><b>0.547 [0.37 to 0.73]</b> I-squared: 0%              |
|                                         |                  | CBT - sleep restriction, stimulus<br>control, sleep education/hygiene: NR                                                                                                                |                 |                       |                                                                                      |
| Navarro-Bravo,<br>2015<br>Meta-analysis | Moderate         | placebo; wait list control; stress<br>management and wellness training;<br>treatment as usual; sleep<br>hygiene/education: NR                                                            | 4               | ISI                   | Cohen's <i>d</i> [95% CI]:<br><b>-0.7 [-1.1, -0.22]</b> Chi square: 11.54; 0.009     |
|                                         |                  | CBT - sleep education, stimulus<br>control, sleep restriction, relaxation,<br>sleep hygiene, cognitive techniques:<br>NR                                                                 |                 |                       |                                                                                      |
| Seyffert, 2016<br>Meta-analysis         | Low              | wait-list control, Internet control,<br>treatment as usual: NR                                                                                                                           | 4               | Sleep diary           | Mean difference [95% CI]:<br><b>-3.74 [-7.10, -0.39]</b> I-squared: 90%              |

| Author, Year<br>Synthesis type          | AMSTAR<br>rating | Intervention and sample size                                                                                                                                                                                                                                                                             | # of<br>studies | Measurement<br>method | Pooled Estimates (MA) or<br>Narrative Results (from SR with no MA)                                                                                                                                                                          |
|-----------------------------------------|------------------|----------------------------------------------------------------------------------------------------------------------------------------------------------------------------------------------------------------------------------------------------------------------------------------------------------|-----------------|-----------------------|---------------------------------------------------------------------------------------------------------------------------------------------------------------------------------------------------------------------------------------------|
| van Straten, 2007<br>Meta-analysis      | Low              | CBT - relaxation; sleep restriction;<br>stimulus control; paradoxical<br>intention; identifying and challenging<br>dysfunctional thoughts: NR                                                                                                                                                            | 38              | ISI                   | Hedges g [95% CI]:<br><b>0.98 [0.82, 1.15]</b> I-squared: 74%                                                                                                                                                                               |
| Ye, 2016<br>Meta-analysis               | Moderate         | waitlist control; no treatment;<br>placebo; psycho-education: NR<br>CBT - sleep hygiene education;<br>cognitive restructuring; stimulus<br>control; sleep restriction; relaxation<br>therapy; hierarchy development;<br>imagery training; scheduled pseudo<br>desensitization; breathing control:<br>828 | 11              | sleep diary (ISI)     | Mean difference [95% CI]:<br><b>-5.88 [-7.46, -4.29]</b> I-squared: NR                                                                                                                                                                      |
| Bogdanov, 2017<br>Systematic<br>Review  | Low              | wait-list control, treatment as usual;<br>internet + email; internet +<br>telephone; internet-based control:<br>827<br>CBT (unspecified)<br>Control (unspecified): NR                                                                                                                                    | 2               | ISI                   | <b>Significant improvement</b> compared to control<br>( <b>p&lt;0.01</b> ); no clinically meaningful improvement                                                                                                                            |
| Dickerson, 2014<br>Systematic<br>Review | High             | CBT (unspecified)<br>usual treatment; waitlist crossover;<br>waitlist control; control; usual<br>treatment<br>Total sample: 72                                                                                                                                                                           | 1               | NR                    | Change in outcome:<br>CBT vs placebo -0.37 [0.10 to 0.84]                                                                                                                                                                                   |
| Ishak, 2012<br>Systematic<br>Review     | Low              | CBT<br>placebo, no treatment, unspecified,<br>usual care<br>Total sample: 209                                                                                                                                                                                                                            | 1               | ISI                   | Change in outcome:<br>Pre-/post scores 2.67 [1.37-3.73]<br>Treatment <b>significantly improved</b> ISI scores<br>intervention group had reduced insomnia scores<br>at 12-month follow-up when compared with<br>placebo ( <b>p&lt;0.01</b> ) |

| Author, Year<br>Synthesis type         | AMSTAR<br>rating  | Intervention and sample size                                                                                                                | # of<br>studies | Measurement<br>method                                                | Pooled Estimates (MA) or<br>Narrative Results (from SR with no MA)                                                                                    |
|----------------------------------------|-------------------|---------------------------------------------------------------------------------------------------------------------------------------------|-----------------|----------------------------------------------------------------------|-------------------------------------------------------------------------------------------------------------------------------------------------------|
| Venables, 2014<br>Systematic<br>Review | Critically<br>Low | group CBT: 660                                                                                                                              | 8               | ISI                                                                  | Change in outcome (average decrease [%]):<br><b>53.1; 39.9; 63.9 (p&lt;0.05)</b><br>3 of 8 studies had a <b>significant decrease</b> in ISI<br>scores |
|                                        |                   | No comparison                                                                                                                               |                 |                                                                      |                                                                                                                                                       |
|                                        |                   | professionally administered CBT:<br>132                                                                                                     | 5               | ISI                                                                  | Change in outcome (average decrease [%]):<br>58.2; 53.1; 63.9; 27.4; 39.9 (p=NR)<br>5 of 5 studies found a reduction in ISI scores                    |
|                                        |                   | No comparison                                                                                                                               |                 |                                                                      |                                                                                                                                                       |
| Zachariae, 2016<br>Meta-analysis       | Moderate          | self-help CBT: 328                                                                                                                          | 4               | ISI                                                                  | Change in outcome (average decrease [%]):<br>45.2; 44.5; 52; 56.2 (p=NR)<br>4 of 4 studies found a non-significant decrease in<br>IS Scores           |
|                                        |                   | No comparison                                                                                                                               |                 |                                                                      |                                                                                                                                                       |
| Howell, 2014<br>Systematic<br>Review   | Moderate          | Multi-component CBT - stimulus<br>control, sleep hygiene, cognitive<br>therapy, sleep restriction, relaxation<br>techniques: NR             | 4               | ISI                                                                  | Overall <b>significant improvement</b> in ISI after<br>CBT intervention                                                                               |
|                                        |                   | Wait-list control; treatment as usual:<br>NR                                                                                                |                 |                                                                      |                                                                                                                                                       |
| Yang, 2014<br>Meta-analysis            | Moderate          | Multi-component CBT -sleep<br>hygiene, sleep restriction, stimulus<br>control, cognitive restructuring, and<br>relaxation therapies         | 2               | habitual sleep<br>efficiency in<br>Pittsburgh sleep<br>quality index | Standardized mean difference [95% CI]:<br>-0.43 [-1.68, 0.83] I-squared: 86%                                                                          |
|                                        |                   | usual care, wait-list control, healthy<br>eating and nutrition, sleep education<br>and hygiene only, no treatment:<br><br>Total sample: 180 |                 |                                                                      |                                                                                                                                                       |
|                                        |                   | CBT + relaxation - CBT; sleep<br>hygiene; relaxation CD: 56                                                                                 |                 |                                                                      |                                                                                                                                                       |
|                                        |                   | Sleep hygiene education; treatment<br>as usual: 56                                                                                          |                 |                                                                      |                                                                                                                                                       |



| Author, Year<br>Synthesis type          | AMSTAR<br>rating | Intervention and sample size                                                                                                                                                                                                  | # of<br>studies | Measurement<br>method                                                                                                                                                                               | Pooled Estimates (MA) or<br>Narrative Results (from SR with no MA)                                        |
|-----------------------------------------|------------------|-------------------------------------------------------------------------------------------------------------------------------------------------------------------------------------------------------------------------------|-----------------|-----------------------------------------------------------------------------------------------------------------------------------------------------------------------------------------------------|-----------------------------------------------------------------------------------------------------------|
| Seyffert, 2016<br>Meta-analysis         | Low              | Self-help CBT - sleep education, stimulus control, sleep restriction, relaxation, sleep hygiene, cognitive techniques: NR<br><br>In-person CBT: NR                                                                            | 2               | Sleep diary                                                                                                                                                                                         | Mean difference [95% CI]:<br>1.07 [-6.23, 8.38] I-squared: 0%                                             |
| <i>Fatigue Severity</i>                 |                  |                                                                                                                                                                                                                               |                 |                                                                                                                                                                                                     |                                                                                                           |
|                                         |                  | CBT-I Group: 302<br><br>sleep hygiene, wait-list control, pharmacological, placebo, psychological: 226                                                                                                                        | 6               | fatigue symptom inventory, multidimensional fatigue symptom inventory, Flinder fatigue scale, multidimensional fatigue inventory, Krupp fatigue scale                                               | Cohen's <i>d</i> [95% CI]:<br>0.35 [-0.16, 0.86] I-squared: 76.5%                                         |
| Ballesio, 2017<br>Meta-analysis         | High             | CBT-I Individual: 238<br><br>placebo, sleep hygiene, wait-list control, psychological, CBT-I self-help: 160                                                                                                                   | 7               | multi-dimensional fatigue inventory, fatigue severity scale, chronic respiratory disease questionnaire-fatigue scale, piper fatigue scale                                                           | Cohen's <i>d</i> [95% CI]:<br><b>0.45 [0.07, 0.83]</b> I-squared: 76.5%                                   |
|                                         |                  | CBT-I Self-help: 665<br><br>sleep hygiene, wait-list control, pharmacological: 433                                                                                                                                            | 7               | fatigue severity scale, multi-dimensional fatigue inventory, daytime fatigue scale, multidimensional fatigue symptoms inventory-short form                                                          | Cohen's <i>d</i> [95% CI]:<br>0.36 [-0.15, 0.88]<br>I-squared: 76.5%                                      |
| Tang, 2015<br>Meta-analysis             | Moderate         | CBT-I - psychoeducation, sleep hygiene, stimulus control, sleep restriction, cognitive therapy, and relaxation: 380<br><br>waitlist, treatment as usual; sleep hygiene advice; healthy eating control; nutrition control: 341 | 6               | multidimensional fatigue inventory (MFI); fatigue symptom inventory (FSI); piper fatigue scale (PFS); general fatigue scale (GFS); multidimensional fatigue symptom inventory-short form (MFSI-SF); | Standardized mean difference [95% CI]:<br><b>0.38 [0.08, 0.69]</b> I-squared: 71%                         |
| Dickerson, 2014<br>Systematic<br>Review | High             | CBT (unspecified): 12<br><br>No comparator (pre- post-intervention)                                                                                                                                                           | 1               | NR                                                                                                                                                                                                  | Change in outcome:<br>Pre-/post scores (95% CI) <b>-0.82 [-1.87, -0.16]</b><br>Fatigue improved by week 8 |

| Author, Year<br>Synthesis type          | AMSTAR<br>rating | Intervention and sample size                                                                                                                                                                                                                                            | # of<br>studies | Measurement<br>method             | Pooled Estimates (MA) or<br>Narrative Results (from SR with no MA)                                                                                                                                      |
|-----------------------------------------|------------------|-------------------------------------------------------------------------------------------------------------------------------------------------------------------------------------------------------------------------------------------------------------------------|-----------------|-----------------------------------|---------------------------------------------------------------------------------------------------------------------------------------------------------------------------------------------------------|
| Howell, 2014<br>Systematic<br>Review    | Moderate         | Multi-component CBT - sleep hygiene, sleep restriction, stimulus control, cognitive restructuring, and relaxation therapies<br><br>usual care, wait-list control, healthy eating and nutrition, sleep education and hygiene only, no treatment<br><br>Total sample: 178 | 3               | Sleep diary                       | Fatigue had <b>significant improvement</b> in all studies post CBT intervention                                                                                                                         |
| Yang, 2014<br>Meta-analysis             | Moderate         | CBT + relaxation - CBT; sleep hygiene; relaxation CD: 50<br><br>Sleep hygiene education; treatment as usual: 48                                                                                                                                                         | 2               | subjective fatigue questionnaire  | Standardized mean difference [95% CI]: 0.77 [0.36, 1.18] I-squared: 0%                                                                                                                                  |
| <i>Health-related Quality of Life</i>   |                  |                                                                                                                                                                                                                                                                         |                 |                                   |                                                                                                                                                                                                         |
| Brooks, 2014<br>Systematic<br>Review    | Low              | CBT-I: 7<br><br>No comparator (pre- post-intervention)                                                                                                                                                                                                                  | 1               | daily sleep diaries, ISI          | Improvements in quality of life measure (p-values not reported)                                                                                                                                         |
| Dickerson, 2014<br>Systematic<br>Review | High             | CBT (unspecified)<br><br>usual treatment; waitlist crossover; waitlist control; control; usual treatment<br><br>Total sample: 72<br>CBT (unspecified): 10                                                                                                               | 1               | FACT-B                            | Change in outcome:<br>CBT vs placebo 0.37 [-0.11 to 0.83]                                                                                                                                               |
| Ishak, 2012<br>Systematic<br>Review     | Low              | No comparator (pre- post-intervention)<br><br>CBT (unspecified)<br><br>Placebo; no treatment; unspecified; usual care<br><br>Total sample: 706                                                                                                                          | 1               | Global QOL                        | Change in outcome:<br>-1.09 [-1.98 to -.011]<br>Increase in global and cognitive dimensions of quality of life at 8 weeks follow-up                                                                     |
|                                         |                  |                                                                                                                                                                                                                                                                         | 4               | SF-36; CIS-20; GHQ; PANAS; FACT-G | Change in outcome (pre-post ES):<br>physical HRQoL: 0.739; 0.739;<br>mental HRQoL: 0.739; 0.082<br><b>Significant improvement</b> in physical, emotional and mental health QoL was found in all studies |

| Author, Year<br>Synthesis type       | AMSTAR<br>rating | Intervention and sample size                                                                                                                                                                                                                                                | # of<br>studies | Measurement<br>method | Pooled Estimates (MA) or<br>Narrative Results (from SR with no MA)                                                 |
|--------------------------------------|------------------|-----------------------------------------------------------------------------------------------------------------------------------------------------------------------------------------------------------------------------------------------------------------------------|-----------------|-----------------------|--------------------------------------------------------------------------------------------------------------------|
| Howell, 2014<br>Systematic<br>Review | Moderate         | Multi-component CBT - sleep hygiene, sleep restriction, stimulus control, cognitive restructuring, and relaxation therapies<br><br>usual care, wait-list control, healthy eating and nutrition, sleep education and hygiene only, no treatment                              | 1               | NR                    | <b>Significant improvement</b> since baseline after CBT intervention (p-values not reported)                       |
| Total sample: 81                     |                  |                                                                                                                                                                                                                                                                             |                 |                       |                                                                                                                    |
| Ishak, 2012<br>Systematic<br>Review  | Low              | CBT (individual): psychoeducation, sleep hygiene, stimulus control, sleep restriction, relaxation exercises, cognitive restructuring<br><br>CBT (group): psychoeducation, sleep hygiene, stimulus control, sleep restriction, relaxation exercises, cognitive restructuring | 1               | SF-36 SIP             | Both groups demonstrated <b>significant improvement</b> in quality of life compared to baseline ( <b>p=0.025</b> ) |
| Total sample: 58                     |                  |                                                                                                                                                                                                                                                                             |                 |                       |                                                                                                                    |

**Table E9. Behavioural Interventions**

| Author, Year<br>Synthesis type    | AMSTAR<br>rating | Intervention and sample size                                                                                                               | # of<br>studies | Measurement<br>method      | Pooled Estimates (MA) or<br>Narrative Results (from SR with no MA)                                                                                                                                                                                                                |
|-----------------------------------|------------------|--------------------------------------------------------------------------------------------------------------------------------------------|-----------------|----------------------------|-----------------------------------------------------------------------------------------------------------------------------------------------------------------------------------------------------------------------------------------------------------------------------------|
| <i>Sleep onset latency</i>        |                  |                                                                                                                                            |                 |                            |                                                                                                                                                                                                                                                                                   |
| Brasure, 2015<br>Meta-analysis    | High             | Sleep restriction: 68<br>wait-list control, no treatment, or<br>sleep hygiene/sleep education: 73                                          | 2               | subjective<br>report       | Mean difference [95% CI]:<br>-11.38 [-27.74, 4.99] I-squared: 87%                                                                                                                                                                                                                 |
| Miller, 2014<br>Systematic Review | High             | Sleep restriction therapy: 98<br>wait-list control; sleep hygiene<br>instructions: 94                                                      | 4               | sleep diary;<br>actigraphy | Change in outcome (effect size; SD):<br><i>intervention [pre-post]: -19.34 minutes (0.64; 0.37);</i><br><i>control [pre-post]: -3.64 minutes (0.06; 0.36)</i><br><br>Sleep restriction arm: sleep latency decreased in all<br>studies, the weighted effect size was medium (0.64) |
| Buscemi, 2005<br>Meta-analysis    | High             | Relaxation Training (autogenic,<br>breathing process, EMG<br>feedback); Relaxation exercises<br>(group, hypnotic, progressive):<br>199     | 13              | sleep diary                | Mean difference [95% CI]:<br>-14.56 [-29.33, 0.20] I-squared: 96.1%                                                                                                                                                                                                               |
| Brasure, 2015<br>Meta-analysis    | High             | Placebo: 185<br>Multicomponent Behavioral<br>Interventions or Brief Behavioral<br>Therapy: 70<br><br>Information control or placebo:<br>76 | 3               | subjective<br>report       | Mean difference [95% CI]:<br><b>-10.43 [-16.31, -4.55]</b> I-squared: 0%                                                                                                                                                                                                          |

|                                    |                |                                                                                                                                                                  |   |                            |                                                                                                                                                                                                                                                                                                                                                                      |
|------------------------------------|----------------|------------------------------------------------------------------------------------------------------------------------------------------------------------------|---|----------------------------|----------------------------------------------------------------------------------------------------------------------------------------------------------------------------------------------------------------------------------------------------------------------------------------------------------------------------------------------------------------------|
|                                    |                | Multifactor intervention: stimulus control, relaxation response, sleep education                                                                                 |   |                            | Change in outcome (p-value):<br>Multifactor intervention: <b>77.3→17.5mins (p&lt;0.001)</b> ;<br>stimulus control: <b>74.9→28mins (p&lt;0.001)</b>                                                                                                                                                                                                                   |
| Wang, 2005<br>Systematic Review    | Moderate       | Stimulus control<br>Total sample: 18                                                                                                                             | 1 | sleep diary                | Patients achieving SOL ≤20 mins:<br>Multifactor: <b>6/9</b> ; Stimulus control: <b>2/9</b><br><b>(p&lt;0.05 between groups)</b><br><br>Both groups had a statistically and clinically significant change in mean sleep onset latency; significantly greater proportion of patients receiving multifactor intervention achieved 'good sleeper status' (SOL ≤ 20 mins) |
| <i>Total Sleep Time</i>            |                |                                                                                                                                                                  |   |                            |                                                                                                                                                                                                                                                                                                                                                                      |
| Brasure, 2015<br>Meta-analysis     | High           | Sleep restriction: 68<br>wait-list control, no treatment, or sleep hygiene/sleep education: 73                                                                   | 2 | subjective report          | Mean difference [95% CI]:<br>-17.57 [-102.36, 67.21] I-squared: 93%                                                                                                                                                                                                                                                                                                  |
| McCurry, 2007<br>Systematic Review | Critically Low | Sleep restriction (nap sleep restriction therapy; sleep compression; sleep compression guidance and sleep hygiene)<br>placebo; waiting list<br>Total sample : 55 | 1 | actigraphy                 | Sleep restriction <b>more effective</b> than either nap restriction or control on actigraphic total sleep time                                                                                                                                                                                                                                                       |
| Miller, 2014<br>Systematic Review  | High           | Sleep restriction therapy: 98<br>wait-list control; sleep hygiene instructions: 94                                                                               | 4 | sleep diary;<br>actigraphy | Change in outcome [effect size (SD)]: intervention [pre-post] 17.06 minutes (0.30; 0.31); control [pre-post] 6.13 minutes (0.01; 0.40) Secondary pre-to-post measures of sleep diary variables were also compared at post-treatment to baseline levels. This revealed a small non-significant increase in total sleep time (ES=0.3)                                  |
| Brasure, 2015<br>Meta-analysis     | High           | Relaxation Therapy: 39<br>passive control: 38                                                                                                                    | 2 | subjective report          | Mean difference [95% CI]:<br>10.23 [-19.64, 40.11] I-squared: 29%                                                                                                                                                                                                                                                                                                    |
| <i>Wake after sleep onset</i>      |                |                                                                                                                                                                  |   |                            |                                                                                                                                                                                                                                                                                                                                                                      |

|                                      |                   |                                                                                                                                                   |   |                           |                                                                                                                                                                                                                                                                                       |
|--------------------------------------|-------------------|---------------------------------------------------------------------------------------------------------------------------------------------------|---|---------------------------|---------------------------------------------------------------------------------------------------------------------------------------------------------------------------------------------------------------------------------------------------------------------------------------|
| Miller, 2014<br>Systematic Review    | High              | Sleep restriction therapy: 82<br>wait-list control; sleep hygiene<br>instructions: 78                                                             | 3 | sleep diary<br>actigraphy | Change in outcome [effect size (SD)]:<br>intervention [pre-post]: -42.17 min, [1.36 (0.42)]<br>control: [pre-post] -11.30 min [0.01 (0.55)]<br>Reductions for wake after sleep onset were found in<br>three studies; the weighted effect size in the<br>intervention was large (1.36) |
| Buscemi, 2005<br>Meta-analysis       | High              | Relaxation Training (autogenic,<br>breathing process, EMG<br>feedback); Relaxation exercises<br>(group, hypnotic, progressive): 60<br>Placebo: 57 | 3 | sleep diary               | Mean difference [95% CI]:<br>-1.61 [-14.05, 10.82] I-squared: 20%                                                                                                                                                                                                                     |
| Brasure, 2015<br>Meta-analysis       | High              | Multicomponent Behavioral<br>Interventions or Brief Behavioral<br>Therapy: 70 patients<br>Information control or placebo:<br>76 patients          | 3 | subjective<br>report      | Mean difference [95% CI]:<br><b>-14.9 [-22.66, -7.14]</b> I-squared: 0%                                                                                                                                                                                                               |
| <i>Sleep Quality</i>                 |                   |                                                                                                                                                   |   |                           |                                                                                                                                                                                                                                                                                       |
| Hwang, 2016<br>Meta-analysis         | Critically<br>Low | Behavioural therapy; Brief<br>behavioral treatment: NR<br>Control (unspecified): NR                                                               | 5 | PSQI                      | Standardized mean difference [95% CI]:<br><b>1.90 [0.04, 2.94]</b> I-squared: 96.27%                                                                                                                                                                                                  |
| Bogdanov, 2017<br>Systematic Review  | Low               | Problem solving therapy<br>sleep education only<br>Total sample: 356                                                                              | 1 | PSQI                      | <b>Significant improvement</b> compared to control at 6-<br>month but not 12-month follow-up<br><b>(p=0.003, 6 months; p=0.88, 12 months)</b>                                                                                                                                         |
| Miller, 2014<br>Systematic Review    | High              | Sleep restriction therapy: 44<br>wait-list control; sleep hygiene<br>instructions: 50                                                             | 1 | sleep diary               | Change in outcome (effect size; SD):<br>intervention [pre-post] 2.77→2.90 (0.3; NA);<br>control [pre-post]: 2.57→2.58 (0.03; NA)<br>Sleep quality ratings were only reported in one study<br>and were found to increase (ES=0.3)                                                      |
| Brooks, 2014<br>Systematic Review    | Low               | Progressive relaxation training:<br>37<br>Control: NR                                                                                             | 1 | sleep diary               | Treatment group had <b>significant difference</b> in sleep<br>quality pre- and post-treatment                                                                                                                                                                                         |
| Hellström, 2011<br>Systematic Review | Moderate          | mental imagery<br>usual care<br>Total sample: 36                                                                                                  | 1 | VSH-sleep<br>scale        | Effects of relaxation on sleep quality were small and<br>did not reach significance                                                                                                                                                                                                   |

|                                    |                |                                                                                                                                                                                                   |   |                                                                              |                                                                                                                                                                                                                                                 |
|------------------------------------|----------------|---------------------------------------------------------------------------------------------------------------------------------------------------------------------------------------------------|---|------------------------------------------------------------------------------|-------------------------------------------------------------------------------------------------------------------------------------------------------------------------------------------------------------------------------------------------|
| Tamrat, 2013<br>Systematic Review  | Low            | Relaxation techniques; audiotape guided imagery; relaxation tapes usual care<br>solitary activity; baseline<br>Total sample: 211                                                                  | 3 | self-rating (poor, fair, good); Richards Campbell Sleep Questionnaire (RCSQ) | In summary, there is low strength of evidence that studies of relaxation techniques improve sleep quality                                                                                                                                       |
| Seda, 2015<br>Meta-analysis        | Low            | Imagery rehearsal therapy (IRT): NR<br>CBT (stimulus control and sleep restriction therapy) + Imagery rehearsal therapy (IRT): NR                                                                 | 8 | PSQI                                                                         | Cohen's <i>d</i> (95% CI):<br>IRT post-treatment: 0.50 (0.16 to 0.84)<br>IT+CBT post-treatment: 1.32 (0.68 to 1.96)<br>Q-statistic (p-value): 4.75 (p=0.03)                                                                                     |
| <i>Sleep Satisfaction</i>          |                |                                                                                                                                                                                                   |   |                                                                              |                                                                                                                                                                                                                                                 |
| McCurry, 2007<br>Systematic Review | Critically Low | Sleep restriction (nap sleep restriction therapy; sleep compression; sleep compression guidance and sleep hygiene)<br>placebo; waiting list<br>Total sample: 125                                  | 1 | NR                                                                           | sleep compression guidance in combination with sleep education delivered via a standardized video resulted in greater post-test sleep satisfaction scores compared to placebo                                                                   |
| <i>Sleep Efficiency</i>            |                |                                                                                                                                                                                                   |   |                                                                              |                                                                                                                                                                                                                                                 |
| McCurry, 2007<br>Systematic Review | Critically Low | Sleep restriction (nap sleep restriction therapy; sleep compression; sleep compression guidance and sleep hygiene)<br>placebo; waiting list<br>Total sample: 129<br>sleep restriction therapy: 82 | 2 | sleep logs                                                                   | Sleep restriction therapy was found to be <b>significantly more beneficial</b> than a sleep hygiene/placebo control                                                                                                                             |
| Miller, 2014<br>Systematic Review  | High           | wait-list control; sleep hygiene instructions: 78                                                                                                                                                 | 3 | sleep diary actigraphy                                                       | Change in outcome (effect size; SD):<br>intervention [pre-post]: 16.28% (1.50; 0.35);<br>Control [pre-post]: 4.59% (0.04; 0.23)<br>Sleep efficiency increased in three studies; the effect size for sleep efficiency the intervention was large |
| <i>Fatigue Severity</i>            |                |                                                                                                                                                                                                   |   |                                                                              |                                                                                                                                                                                                                                                 |
| Ballesio, 2017<br>Meta-analysis    | High           | BT Group: 24<br>Placebo: 50                                                                                                                                                                       | 2 | fatigue severity scale (2)                                                   | Cohen's <i>d</i> [95% CI]:<br>0.09 [-0.61 to 0.79] I-squared: 76.5%                                                                                                                                                                             |

**Table E10. Mindfulness**

| <b>Author, Year<br/>Synthesis type</b> | <b>AMSTAR<br/>rating</b> | <b>Intervention and sample size</b>                                                                                                                                                                                | <b># of<br/>studies</b> | <b>Measurement<br/>method</b> | <b>Pooled Estimates (MA) or<br/>Narrative Results (from SR with no MA)</b>          |
|----------------------------------------|--------------------------|--------------------------------------------------------------------------------------------------------------------------------------------------------------------------------------------------------------------|-------------------------|-------------------------------|-------------------------------------------------------------------------------------|
| <i>Sleep onset latency</i>             |                          |                                                                                                                                                                                                                    |                         |                               |                                                                                     |
| Gong, 2016<br>Meta-analysis            | Low                      | mindfulness based stress reduction;<br>mindfulness meditation;<br>mindfulness based therapy for<br>insomnia<br><br>wait list control; sleep hygiene<br>education; self-monitoring<br>condition<br>Total sample: 83 | 2                       | sleep diary                   | standardized mean difference [95% CI]:<br><b>-0.53 [-0.97, -0.09]</b> I-squared: 0% |
| <i>Total Sleep Time</i>                |                          |                                                                                                                                                                                                                    |                         |                               |                                                                                     |
| Gong, 2016<br>Meta-analysis            | Low                      | mindfulness based stress reduction;<br>mindfulness meditation;<br>mindfulness based therapy for<br>insomnia<br><br>wait list control; sleep hygiene<br>education; self-monitoring<br>condition<br>Total sample: 58 | 2                       | sleep diary                   | standardized mean difference [95% CI]:<br>0.28 [-0.24, 0.80] I-squared: 0%          |
| <i>Sleep Quality</i>                   |                          |                                                                                                                                                                                                                    |                         |                               |                                                                                     |
| Gong, 2016<br>Meta-analysis            | Low                      | mindfulness based stress reduction;<br>mindfulness meditation;<br>mindfulness based therapy for<br>insomnia<br><br>wait list control; sleep hygiene<br>education; self-monitoring<br>condition<br>Total sample: 83 | 2                       | sleep diary                   | standardized mean difference [95% CI]:<br><b>0.68 [0.24, 1.13]</b> I-squared: 0%    |
|                                        |                          | Total sample: 109                                                                                                                                                                                                  | 2                       | PSQI                          | standardized mean difference [95% CI]:<br>-1.09 [-1.50, 0.69] I-squared: 0%         |



|                                     |                   |                                                                                                                                                                                                                    |   |             |                                                                                                                                     |
|-------------------------------------|-------------------|--------------------------------------------------------------------------------------------------------------------------------------------------------------------------------------------------------------------|---|-------------|-------------------------------------------------------------------------------------------------------------------------------------|
| Venables, 2014<br>Systematic Review | Critically<br>Low | mindfulness based stress reduction;<br>mind-body bridging; mindfulness<br>meditation: 63<br>No comparator<br>(pre- post- intervention)                                                                             | 1 | PSQI        | Proportion of respondents: [pre-intervention ]<br>91% score >5; 51% score >10<br>[post-intervention]<br>79% score >5; 27% score >10 |
| <hr/> <i>Sleep efficiency</i> <hr/> |                   |                                                                                                                                                                                                                    |   |             |                                                                                                                                     |
| Gong, 2016<br>Meta-analysis         | Low               | mindfulness based stress reduction;<br>mindfulness meditation;<br>mindfulness based therapy for<br>insomnia<br><br>wait list control; sleep hygiene<br>education; self-monitoring<br>condition<br>Total sample: 58 | 2 | sleep diary | standardized mean difference [95% CI]:<br>0.85 [-0.31, 1.40] I-squared: 0%                                                          |
| Venables, 2014<br>Systematic Review | Critically<br>Low | mindfulness based stress reduction;<br>mind-body bridging; mindfulness<br>meditation: 205<br>No comparator<br>(pre- post- intervention)                                                                            | 3 | NR          | 2 trials showed <b>significant improvement</b> in SE; 1<br>trial showed no significant improvement                                  |

**Table E11. Combination Therapy**

| <b>Author, Year<br/>Synthesis type</b> | <b>AMSTAR<br/>rating</b> | <b>Intervention and sample size</b>                                                                                                                        | <b># of<br/>studies</b> | <b>Measurement<br/>method</b> | <b>Pooled Estimates (MA) or<br/>Narrative Results (from SR with no MA)</b>                                                                                                                                |
|----------------------------------------|--------------------------|------------------------------------------------------------------------------------------------------------------------------------------------------------|-------------------------|-------------------------------|-----------------------------------------------------------------------------------------------------------------------------------------------------------------------------------------------------------|
| <i>Sleep onset latency</i>             |                          |                                                                                                                                                            |                         |                               |                                                                                                                                                                                                           |
| Chiesa, 2009<br>Systematic Review      | Low                      | Pharmacotherapy (general) and<br>Mindfulness based cognitive therapy;<br>mindfulness based stress reduction: 14<br>No comparator (pre- post- intervention) | 1                       | NR                            | Median sleep latency reduced from 30 minutes<br>to 26 minutes per night                                                                                                                                   |
| <i>Total Sleep Time</i>                |                          |                                                                                                                                                            |                         |                               |                                                                                                                                                                                                           |
| Buscemi, 2005<br>Meta-analysis         | High                     | Triazolam; temazepam and CBT:<br>27Placebo: 25                                                                                                             | 2                       | sleep diary                   | Mean difference [95% CI]:<br>23.2 [-2.3, 48.8] I-squared: 0%                                                                                                                                              |
| Chiesa, 2009<br>Systematic Review      | Low                      | Pharmacotherapy (general) and<br>Mindfulness based cognitive therapy;<br>mindfulness based stress reduction: 30<br>No comparator (pre- post- intervention) | 2                       | NR                            | 1 trial showed and average increase of 1 hour<br>total sleep time; 1 trial showed <b>significant<br/>improvement</b> in measures of sleep quantity<br>that persisted at 6 and 12 months                   |
| <i>Sleep Quality</i>                   |                          |                                                                                                                                                            |                         |                               |                                                                                                                                                                                                           |
| Chiesa, 2009<br>Systematic Review      | Low                      | Pharmacotherapy (general) and<br>Mindfulness based cognitive therapy;<br>mindfulness based stress reduction: 14<br>No comparator (pre- post- intervention) | 1                       | NR                            | Measures of sleep quality <b>improved<br/>significantly</b> post-treatment, improvements<br>were maintained at 6 and 12 months; levels of<br>mindfulness were shown to correlate with<br>quality of sleep |

## Appendix F: Tables of primary studies by treatment comparison for outcomes with more than one included SR or SR+MA

Table F1. Primary studies across included systematic reviews that examined Benzodiazepines

| Primary Studies                 | Buscemi, 2005*<br>n = 18 | Sateia, 2017*<br>n = 2 | Soldatos, 1999*<br>n = 28 <sup>1</sup> | Kolla, 2011<br>n = 1 | Swainston<br>Harrison,<br>2005<br>n = 1 | Times Cited | Outcome(s)      |
|---------------------------------|--------------------------|------------------------|----------------------------------------|----------------------|-----------------------------------------|-------------|-----------------|
| <b>Flurazepam (n=10)</b>        |                          |                        |                                        |                      |                                         |             |                 |
| Campbell, 1987                  | +                        | --                     | --                                     | --                   | --                                      | 1           | SOL             |
| Cohn, 1991                      | +                        | --                     | --                                     | --                   | --                                      | 1           | SOL             |
| Fillingim, 1982                 | +                        | --                     | --                                     | --                   | --                                      | 1           | SOL             |
| Fleming, 1995                   | +                        | --                     | --                                     | --                   | --                                      | 1           | SOL             |
| Hartmann, 1983                  | +                        | --                     | --                                     | --                   | --                                      | 1           | SOL             |
| Mamelak, 1987                   | +                        | --                     | --                                     | --                   | --                                      | 1           | SOL             |
| Mamelak, 1989                   | +                        | --                     | --                                     | --                   | --                                      | 1           | SOL             |
| Mello de Paula, 1984            | +                        | --                     | --                                     | --                   | --                                      | 1           | SOL             |
| Mitler, 1984                    | +                        | --                     | --                                     | --                   | --                                      |             | SOL             |
| Scharf, 1990                    | +                        | --                     | --                                     | --                   | --                                      | 1           | SOL             |
| <b>Temazepam (n=8)</b>          |                          |                        |                                        |                      |                                         |             |                 |
| Beary, 1984                     | +                        | --                     | --                                     | --                   | --                                      | 1           | SOL             |
| Fillingim, 1982                 | +                        | --                     | --                                     | --                   | --                                      | 1           | SOL             |
| Glass, 2008                     | --                       | +                      | --                                     | --                   | --                                      | 1           | SOL, TST,<br>SQ |
| Hindmarch, 1979                 | --                       | +                      | --                                     | --                   | --                                      | 1           | SQ              |
| Leppik, 1997                    | +                        | --                     | --                                     | --                   | --                                      | 1           | SOL             |
| Tuk, 1997                       | +                        | --                     | --                                     | --                   | --                                      | 1           | SOL, WASO       |
| Morin, 1999                     | +                        | --                     | --                                     | --                   | --                                      | 1           | WASO            |
| Wu, 2006                        | --                       | +                      | --                                     | --                   | --                                      | 1           | SOL, TST        |
| <b>Triazolam (n=38)</b>         |                          |                        |                                        |                      |                                         |             |                 |
| Adam, 1984                      | --                       | --                     | +                                      | --                   | --                                      | --          | SOL, TST        |
| Bergougnan, 1992                | --                       | --                     | +                                      | --                   | --                                      | --          | SOL, TST        |
| Borberly and Achermann,<br>1991 | --                       | --                     | +                                      | --                   | --                                      | --          | SOL, TST        |
| Bowen, 1978                     | +                        | --                     | --                                     | --                   | --                                      | 1           | SOL             |
| Cluydts, 1986                   | --                       | --                     | +                                      | --                   | --                                      | --          | SOL, TST        |
| Cohn, 1983                      | +                        | --                     | --                                     | --                   | --                                      | 1           | SOL             |
| Drake(1), 2000                  | +                        | --                     | --                                     | --                   | --                                      | 1           | SOL             |
| Drake(2), 2000                  | +                        | --                     | --                                     | --                   | --                                      | 1           | SOL             |

|                                |    |    |    |    |    |    |                   |
|--------------------------------|----|----|----|----|----|----|-------------------|
| Fabre, 1997                    | -- | -- | -- | +  | -- | 1  | TST               |
| Kales 1976                     | -- | -- | +  | -- | -- | -- | SOL, TST          |
| Kales, 1986                    | -- | -- | +  | -- | -- | -- | SOL, TST          |
| Kales, 1991                    | -- | -- | +  | -- | -- | -- | SOL, TST          |
| Kanno, 1993                    | -- | -- | +  | -- | -- | -- | SOL, TST          |
| Leppik, 1997                   | +  | -- | -- | -- | -- | 1  | SOL               |
| Mamelak, 1984                  | -- | -- | +  | -- | -- | -- | SOL, TST          |
| Mamelak, 1990                  | -- | -- | +  | -- | -- | -- | SOL, TST          |
| Merlotti, 1988                 | -- | -- | +  | -- | -- | -- | SOL, TST          |
| Mitler, 1984                   | +  | -- | +  | -- | -- | 1  | SOL, TST,<br>WASO |
| Monti, 1994                    | -- | -- | +  | -- | +  | -- | SOL, TST          |
| Mouret, 1990                   | -- | -- | +  | -- | -- | -- | SOL, TST          |
| Nicholson and Stone,<br>1980   | -- | -- | +  | -- | -- | -- | SOL, TST          |
| Nicholson, 1982                | -- | -- | +  | -- | -- | -- | SOL, TST          |
| Ogura, 1980                    | -- | -- | +  | -- | -- | -- | SOL, TST          |
| Okuma and Honda, 1978          | -- | -- | +  | -- | -- | -- | SOL, TST          |
| Pegram, 1980                   | -- | -- | +  | -- | -- | -- | SOL, TST          |
| Roehrs, 1992                   | -- | -- | +  | -- | -- | -- | SOL, TST          |
| Roth, 1974                     | -- | -- | +  | -- | -- | -- | SOL, TST          |
| Roth, 1976                     | -- | -- | +  | -- | -- | -- | SOL, TST          |
| Roth, 1977                     | -- | -- | +  | -- | -- | -- | SOL, TST          |
| Saletu, 1994                   | -- | -- | +  | -- | -- | -- | SOL, TST          |
| Scharf, 1990                   | +  | -- | +  | -- | -- | 1  | SOL, TST          |
| Spinweber and Johnson,<br>1982 | -- | -- | +  | -- | -- | -- | SOL, TST          |
| Steens, 1993                   | +  | -- | -- | -- | -- | 1  | SOL, WASO         |
| Stepanski, 1982                | -- | -- | +  | -- | -- | -- | SOL, TST          |
| Tiberge, 1988                  | -- | -- | +  | -- | -- | -- | SOL, TST          |
| Vogel, 1975                    | -- | -- | +  | -- | -- | -- | SOL, TST          |
| Walsh, 1998                    | +  | -- | -- | -- | -- | 1  | SOL               |
| Ware, 1997                     | -- | -- | +  | -- | -- | -- | SOL, TST          |

\* Systematic review with meta-analysis

<sup>1</sup>The authors of the Soldatos, 1999 paper did not clearly report which studies were included in the analyses for each outcome. All of the primary studies in this review are listed here but are not included in times cited count.



| Primary Studies                     | Brasure,<br>2015*<br>n = 8 | Buscemi,<br>2005*<br>n = 22 | Sateia,<br>2017*<br>n = 12 | Soldatos,<br>1999* <sup>1</sup><br>n = 34 | Mayers,<br>2005<br>n = 1 | Mendelson,<br>2005<br>n = 1 | Swainston<br>Harrison, 2005<br>n = 2 | Ishak,<br>2012<br>n = 3 | Cimolai,<br>2007<br>n = 4 | Times<br>Cited | Outcome(s)                   |
|-------------------------------------|----------------------------|-----------------------------|----------------------------|-------------------------------------------|--------------------------|-----------------------------|--------------------------------------|-------------------------|---------------------------|----------------|------------------------------|
| Monti, 1989                         | --                         | --                          | --                         | +                                         | --                       | --                          | --                                   | --                      | --                        | --             | SOL, TST                     |
| Monti, 1994                         | --                         | --                          | --                         | --                                        | --                       | --                          | +                                    | --                      | --                        | 1              | TST,<br>WASO                 |
| Monti, 1996                         | --                         | +                           | --                         | --                                        | --                       | --                          | --                                   | --                      | --                        | 1              | SOL,<br>WASO                 |
| Monti, 2000                         | --                         | +                           | --                         | --                                        | --                       | --                          | --                                   | --                      | --                        | 1              | SOL,<br>WASO                 |
| Nicholson and<br>Pascoe, 1986       | --                         | --                          | --                         | +                                         | --                       | --                          | --                                   | --                      | --                        | --             | SOL, TST                     |
| Nobuhara, 1992                      | --                         | --                          | --                         | +                                         | --                       | --                          | --                                   | --                      | --                        | --             | SOL, TST                     |
| Oswald and<br>Adam, 1988            | --                         | --                          | --                         | +                                         | --                       | --                          | --                                   | --                      | --                        | --             | SOL, TST                     |
| Perlis, 2004                        | +                          | --                          | +                          | --                                        | --                       | --                          | --                                   | --                      | --                        | 2              | SOL, TST,<br>WASO            |
| Randall, 2012                       | +                          | --                          | +                          | --                                        | --                       | --                          | --                                   | --                      | --                        | 2              | SOL, TST,<br>WASO, SQ,<br>SE |
| Scharf, 1991a                       | --                         | --                          | --                         | +                                         | --                       | --                          | --                                   | --                      | --                        | --             | SOL, TST                     |
| Scharf, 1991b                       | --                         | --                          | --                         | +                                         | --                       | --                          | --                                   | --                      | --                        | --             | SOL, TST                     |
| Scharf, 1991c                       | --                         | --                          | --                         | +                                         | --                       | --                          | --                                   | --                      | --                        | --             | SOL, TST                     |
| Scharf, 1994                        | +                          | +                           | +                          | +                                         | --                       | --                          | --                                   | --                      | --                        | 3              | SOL, TST,<br>WASO, SQ,<br>SE |
| Staner, 2005                        | --                         | --                          | +                          | --                                        | --                       | --                          | --                                   | --                      | --                        | 1              | SQ                           |
| Steens, 1993                        | --                         | +                           | --                         | --                                        | --                       | --                          | --                                   | --                      | --                        | 1              | SOL,<br>WASO                 |
| Uchimura, 2012                      | --                         | --                          | +                          | --                                        | --                       | --                          | --                                   | --                      | --                        | 1              | SOL, SQ                      |
| Vogel, 1989                         | --                         | --                          | --                         | +                                         | --                       | --                          | --                                   | --                      | --                        | --             | SOL, TST                     |
| Walsh, 1998                         | --                         | +                           | +                          | --                                        | +                        | +                           | --                                   | --                      | --                        | 4              | SOL, TST,<br>WASO, SQ        |
| Walsh, 2000                         | --                         | +                           | --                         | --                                        | --                       | --                          | --                                   | --                      | --                        | 1              | SOL                          |
| Walsh, 2002                         | +                          | +                           | --                         | --                                        | --                       | --                          | --                                   | --                      | --                        | 2              | SOL                          |
| Ware, 1997                          | --                         | --                          | +                          | +                                         | --                       | --                          | +                                    | --                      | --                        | 2              | SOL, TST,<br>WASO, SE        |
| <b>Zolpidem v Triazolam (n = 3)</b> |                            |                             |                            |                                           |                          |                             |                                      |                         |                           |                |                              |
| Monti, 1994                         | --                         | --                          | --                         | --                                        | --                       | --                          | +                                    | --                      | --                        | 1              | TST,                         |

| Primary Studies                                          | Brasure,<br>2015*<br>n = 8 | Buscemi,<br>2005*<br>n = 22 | Sateia,<br>2017*<br>n = 12 | Soldatos,<br>1999* <sup>1</sup><br>n = 34 | Mayers,<br>2005<br>n = 1 | Mendelson,<br>2005<br>n = 1 | Swainston<br>Harrison, 2005<br>n = 2 | Ishak,<br>2012<br>n = 3 | Cimolai,<br>2007<br>n = 4 | Times<br>Cited | Outcome(s)         |
|----------------------------------------------------------|----------------------------|-----------------------------|----------------------------|-------------------------------------------|--------------------------|-----------------------------|--------------------------------------|-------------------------|---------------------------|----------------|--------------------|
|                                                          |                            |                             |                            |                                           |                          |                             |                                      |                         |                           |                | WASO               |
| Silvestri, 1996                                          | --                         | --                          | --                         | --                                        | --                       | --                          | +                                    | --                      | --                        | 1              | SOL,<br>WASO, SE   |
| Ware, 1997                                               | --                         | --                          | --                         | --                                        | --                       | --                          | +                                    | --                      | --                        | 1              | WASO, SE           |
| <b>Zolpidem (nightly) v Zolpidem (as needed) (n = 1)</b> |                            |                             |                            |                                           |                          |                             |                                      |                         |                           |                |                    |
| Hajak, 2002                                              | --                         | --                          | --                         | --                                        | --                       | --                          | --                                   | +                       | --                        | 1              | QoL                |
| <b>Zopiclone v Placebo (n = 21)</b>                      |                            |                             |                            |                                           |                          |                             |                                      |                         |                           |                |                    |
| Billiard, 1989                                           | --                         | --                          | --                         | +                                         | --                       | --                          | --                                   | --                      | --                        | --             | SOL, TST           |
| Campbell, 1987                                           | --                         | +                           | --                         | --                                        | --                       | --                          | --                                   | --                      | --                        | 1              | SOL                |
| Chaudoir, 1983                                           | --                         | +                           | --                         | --                                        | --                       | --                          | --                                   | --                      | --                        | 1              | SOL                |
| Fleming, 1988                                            | --                         | --                          | --                         | +                                         | --                       | --                          | --                                   | --                      | --                        | --             | SOL, TST           |
| Godtlibsen and<br>Dreyfus, 1980                          | --                         | --                          | --                         | +                                         | --                       | --                          | --                                   | --                      | --                        | --             | SOL, TST           |
| Goldenberg, 1994                                         | --                         | --                          | --                         | --                                        | --                       | --                          | --                                   | +                       | --                        | 1              | QoL                |
| Jobert, 1993                                             | --                         | --                          | --                         | +                                         | --                       | --                          | --                                   | --                      | --                        | --             | SOL, TST           |
| Kim, 1993                                                | --                         | --                          | --                         | +                                         | --                       | --                          | --                                   | --                      | --                        | --             | SOL, TST           |
| Lamphere, 1989                                           | --                         | +                           | --                         | +                                         | --                       | --                          | --                                   | --                      | --                        | 1              | SOL, TST           |
| Leger, 1995                                              | --                         | --                          | --                         | --                                        | --                       | --                          | --                                   | +                       | --                        | 1              | QoL                |
| Lemoine, 1995                                            | --                         | --                          | --                         | --                                        | --                       | --                          | --                                   | --                      | +                         | 1              | A/D/D              |
| Mamelak, 1982                                            | --                         | --                          | --                         | +                                         | --                       | --                          | --                                   | --                      | +                         | 1              | SOL, TST,<br>A/D/D |
| Mamelak, 1987                                            | --                         | +                           | --                         | --                                        | --                       | --                          | --                                   | --                      | --                        | 1              | SOL                |
| Monchesky, 1986                                          | --                         | +                           | --                         | --                                        | --                       | --                          | --                                   | --                      | --                        | 1              | SOL                |
| Mouret, 1990                                             | --                         | --                          | --                         | +                                         | --                       | --                          | --                                   | --                      | --                        | --             | SOL, TST           |
| Nicholson and<br>Stone, 1982                             | --                         | --                          | --                         | +                                         | --                       | --                          | --                                   | --                      | --                        | --             | SOL, TST           |
| Nicholson and<br>Stone, 1987                             | --                         | --                          | --                         | +                                         | --                       | --                          | --                                   | --                      | --                        | --             | SOL, TST           |
| Pecknold, 1990                                           | --                         | --                          | --                         | --                                        | --                       | --                          | --                                   | --                      | +                         | 1              | A/D/D              |
| Petre-Quadens<br>,1982                                   | --                         | --                          | --                         | +                                         | --                       | --                          | --                                   | --                      | --                        | --             | SOL, TST           |
| Ponciano, 1990                                           | --                         | --                          | --                         | --                                        | --                       | --                          | --                                   | --                      | +                         | 1              | Hangover           |
| Tiberge, 1988                                            | --                         | --                          | --                         | +                                         | --                       | --                          | --                                   | --                      | --                        | --             | SOL, TST           |

<sup>1</sup>The authors of the Soldatos, 1999 paper did not clearly report which studies were included in the analyses for each outcome. All of the primary studies in this review are listed here and are not included in times cited count.

\*systematic review with meta-analysis

**Table F3. Primary studies across included systematic reviews that examined Suvorexant**

| Primary Studies (n = 3)                                                          | Kishi, 2015*<br>n = 3 | Kuriyama, 2017*<br>n = 3 <sup>2</sup> | Brasure, 2015*<br>n = 2 | Citrome, 2014*<br>n = 3 | Times Cited | Outcome(s)                                   |
|----------------------------------------------------------------------------------|-----------------------|---------------------------------------|-------------------------|-------------------------|-------------|----------------------------------------------|
| Michelson, 2014                                                                  | +                     | †                                     | --                      | --                      | 1           | SOL, TST, WASO, ISI, Hangover, Injury, A/D/D |
| Herring, 2012                                                                    | --                    | †                                     | --                      | --                      | --          | SOL, TST, WASO, ISI, Hangover, Injury, A/D/D |
| Herring, 2014 <sup>1</sup><br>Suvorexant; 15 and 20mg<br>Suvorexant; 30 and 40mg | +                     | †                                     | +                       | +                       | 3           | SOL, TST, WASO, ISI, Hangover, Injury, A/D/D |

<sup>1</sup>This publication includes two trials

<sup>2</sup>only able to ascertain that these three trials were the only ones included in the SR+MA, unable to determine which outcome analyses they contributed to thus they are not counted in the final column

\*systematic review with meta-analysis

**Table F4. Primary studies across included systematic reviews that examined antidepressants**

| Primary Studies                   | Brasure, 2015*<br>n = 2 | Buscemi, 2005*<br>n = 5 | Sateia, 2017*<br>n = 5 | Yuan, 2010*<br>n = 4 | Liu, 2017*<br>n = 6 | Kolla, 2011<br>n = 1 | Mayers, 2005<br>n = 3 | Vande Griend, 2012<br>n = 9 | Yeung, 2015<br>n = NR <sup>1</sup> | Mendelson, 2005<br>n = 8 | Times Cited | Outcome(s)             |
|-----------------------------------|-------------------------|-------------------------|------------------------|----------------------|---------------------|----------------------|-----------------------|-----------------------------|------------------------------------|--------------------------|-------------|------------------------|
| <b>Doxepin v Placebo (n = 12)</b> |                         |                         |                        |                      |                     |                      |                       |                             |                                    |                          |             |                        |
| Goldberg, 1974                    | --                      | --                      | --                     | --                   | --                  | --                   | --                    | --                          | +                                  | --                       | 1           | SOL                    |
| Hajak, 1996                       | --                      | +                       | --                     | --                   | +                   | --                   | +                     | --                          | --                                 | --                       | 3           | SOL, TST, SQ           |
| Hajak, 2000                       | --                      | --                      | --                     | --                   | +                   | --                   | --                    | --                          | --                                 | --                       | 1           | TST                    |
| Hajak, 2001                       | --                      | +                       | --                     | +                    | --                  | --                   | +                     | +                           | +                                  | --                       | 5           | SOL, TST, WASO, SQ, SE |
| Krystal, 2010                     | +                       | --                      | +                      | --                   | +                   | --                   | --                    | +                           | --                                 | --                       | 4           | SOL, TST, WASO, SQ, SE |
| Krystal, 2011                     | --                      | --                      | +                      | --                   | +                   | --                   | --                    | +                           | --                                 | --                       | 3           | SOL, TST, WASO, SE     |



| Primary Studies                     | Brasure, 2015*<br>n = 2 | Buscemi, 2005*<br>n = 5 | Sateia, 2017*<br>n = 5 | Yuan, 2010*<br>n = 4 | Liu, 2017*<br>n = 6 | Kolla, 2011<br>n = 1 | Mayers, 2005<br>n = 3 | Vande Griend, 2012<br>n = 9 | Yeung, 2015<br>n = NR <sup>1</sup> | Mendelson, 2005<br>n = 8 | Times Cited | Outcome(s)             |
|-------------------------------------|-------------------------|-------------------------|------------------------|----------------------|---------------------|----------------------|-----------------------|-----------------------------|------------------------------------|--------------------------|-------------|------------------------|
| Lankford, 2011                      | +                       | --                      | +                      | --                   | --                  | --                   | --                    | +                           | --                                 | --                       | 3           | SOL, TST, WASO         |
| Lankford, 2012                      | --                      | --                      | +                      | --                   | --                  | --                   | --                    | --                          | --                                 | --                       | 1           | SQ                     |
| Rodenbeck, 2003                     | --                      | +                       | --                     | +                    | --                  | --                   | --                    | --                          | --                                 | --                       | 2           | SOL, TST, WASO, SE     |
| Roth, 2007                          | --                      | --                      | +                      | +                    | +                   | --                   | --                    | +                           | --                                 | --                       | 4           | SOL, TST, WASO, SE     |
| Roth, 2010                          | --                      | --                      | --                     | --                   | --                  | --                   | --                    | +                           | --                                 | --                       | 1           | SOL, TST, WASO, SE     |
| Scharf, 2008                        | --                      | --                      | +                      | +                    | +                   | --                   | --                    | +                           | --                                 | --                       | 4           | SOL, TST, WASO, SQ, SE |
| <b>Trazodone v Placebo (n = 20)</b> |                         |                         |                        |                      |                     |                      |                       |                             |                                    |                          |             |                        |
| Kaynak, 2004                        | --                      | --                      | --                     | --                   | --                  | --                   | --                    | --                          | --                                 | +                        | 1           | TST, SQ, SE            |
| Blacker, 1988                       | --                      | --                      | --                     | --                   | --                  | --                   | --                    | --                          | --                                 | +                        | 1           | SQ                     |
| Davey, 1988                         | --                      | --                      | --                     | --                   | --                  | --                   | --                    | --                          | --                                 | +                        | 1           | SQ                     |
| Friedmann, 2008                     | --                      | --                      | --                     | --                   | --                  | +                    | --                    | --                          | --                                 | --                       | 1           | SQ                     |
| Haffmans and Vos, 1999              | --                      | +                       | --                     | --                   | --                  | --                   | --                    | --                          | --                                 | +                        | 2           | SOL, TST               |
| Le Bon, 2003                        | --                      | --                      | --                     | --                   | --                  | +                    | --                    | +                           | --                                 | --                       | 2           | SOL, TST, WASO, SE     |
| Mashiko, 1999                       | --                      | --                      | --                     | --                   | --                  | --                   | +                     | --                          | --                                 | --                       | 1           | TST                    |
| Montgomery, 1983                    | --                      | --                      | --                     | --                   | --                  | --                   | --                    | --                          | --                                 | +                        | 1           | SOL, TST, SQ           |
| Moon, 1998                          | --                      | --                      | --                     | --                   | --                  | --                   | --                    | --                          | --                                 | +                        | 1           | SQ                     |
| Mouret, 1988                        | --                      | --                      | --                     | --                   | --                  | --                   | --                    | --                          | --                                 | +                        | 1           | SOL, TST               |
| Nierenberg, 1994                    | --                      | --                      | --                     | --                   | --                  | --                   | +                     | --                          | --                                 | --                       | 1           | SOL, TST, SQ           |
| Parrino, 1994                       | --                      | --                      | --                     | --                   | --                  | --                   | --                    | --                          | --                                 | +                        | 1           | SOL, TST, WASO, SE     |
| Roth, 2011                          | --                      | --                      | --                     | --                   | --                  | --                   | --                    | +                           | --                                 | --                       | 1           | SOL, WASO              |
| Saletu-Zyhlarz, 2001                | --                      | --                      | --                     | --                   | --                  | --                   | --                    | --                          | --                                 | +                        | 1           | SOL, TST, SE           |

| Primary Studies                     | Brasure, 2015*<br>n = 2 | Buscemi, 2005*<br>n = 5 | Sateia, 2017*<br>n = 5 | Yuan, 2010*<br>n = 4 | Liu, 2017*<br>n = 6 | Kolla, 2011<br>n = 1 | Mayers, 2005<br>n = 3 | Vande Griend, 2012<br>n = 9 | Yeung, 2015<br>n = NR <sup>1</sup> | Mendelson, 2005<br>n = 8 | Times Cited | Outcome(s)         |
|-------------------------------------|-------------------------|-------------------------|------------------------|----------------------|---------------------|----------------------|-----------------------|-----------------------------|------------------------------------|--------------------------|-------------|--------------------|
| Saletu-Zyhlarz, 2002                | --                      | --                      | --                     | --                   | --                  | --                   | --                    | --                          | --                                 | +                        | 1           | TST, SE            |
| Scharf and Sachais, 1990            | --                      | --                      | --                     | --                   | --                  | --                   | --                    | --                          | --                                 | +                        | 1           | SOL, TST, SE       |
| Scharf, 1990                        | --                      | --                      | --                     | --                   | --                  | --                   | --                    | --                          | --                                 | +                        | 1           | WASO               |
| Stein, 2011                         | --                      | --                      | --                     | --                   | --                  | --                   | --                    | +                           | --                                 | --                       | 1           | TST, SE            |
| Van Bommel, 1992                    | --                      | --                      | --                     | --                   | --                  | --                   | --                    | --                          | --                                 | +                        | 1           | SOL, TST, SE       |
| Walsh, 1998                         | --                      | +                       | --                     | --                   | --                  | --                   | +                     | +                           | --                                 | +                        | 4           | SOL, TST, WASO, SQ |
| <b>Trazodone v Zolpidem (n = 1)</b> |                         |                         |                        |                      |                     |                      |                       |                             |                                    |                          |             |                    |
| Walsh, 1998                         | --                      | --                      | --                     | --                   | --                  | --                   | +                     | +                           | --                                 | +                        | 3           | SOL, TST, WASO     |

<sup>1</sup> Unable to determine some or all of the primary studies associated with this review

\*systematic review with meta-analysis

**Table F5. Primary studies across included systematic reviews that examined anti-psychotics**

| Primary Studies           | Anderson, 2014<br>n = 7 | Coe, 2014<br>n = 2 | Kolla, 2011<br>n = 1 | Wine, 2009<br>n = 3 | Times Cited | Outcome(s)       |
|---------------------------|-------------------------|--------------------|----------------------|---------------------|-------------|------------------|
| <b>Quetiapine (n = 9)</b> |                         |                    |                      |                     |             |                  |
| Baune, 2007               | +                       | --                 | --                   | --                  | 1           | SQ               |
| Endicott, 2008            | +                       | --                 | --                   | --                  | 1           | SQ               |
| Juri, 2005                | +                       | --                 | --                   | +                   | 2           | SOL, SQ          |
| Martinotti, 2008          | --                      | --                 | +                    | --                  | 1           | SQ               |
| Robert, 2005              | --                      | --                 | --                   | +                   | 1           | TST, SQ          |
| Tassniyom, 2010           | +                       | +                  | --                   | --                  | 2           | SOL, TST         |
| Terán, 2008               | +                       | --                 | --                   | --                  | 1           | SOL, SQ          |
| Todder, 2006              | +                       | --                 | --                   | --                  | 1           | SOL, TST, SQ, SE |
| Wiegand, 2008             | +                       | +                  | --                   | +                   | 3           | SOL, TST, SQ, SE |



| Primary Studies            | Buscemi, 2004*<br>n = 12 <sup>1</sup> | Buscemi, 2005*<br>n = 8 | Ferracioli-Oda, 2013*<br>n = 8 | McCleery, 2016*<br>n = 2 | Lee, NA*<br>n = 15 | Sateia, 2017* n = 3 | Xu, 2015*<br>n = 8 | Zhang, 2016*<br>n = 4 | Bellon, 2006<br>n = 13 | Chase, 1997<br>n = 2 | Costello, 2014<br>n = 1 | Culpepper, 2015<br>n = 3 | Vural, 2014<br>n = 1 | Times Cited | Outcome(s)             |
|----------------------------|---------------------------------------|-------------------------|--------------------------------|--------------------------|--------------------|---------------------|--------------------|-----------------------|------------------------|----------------------|-------------------------|--------------------------|----------------------|-------------|------------------------|
| James, 1990                | +                                     | +                       | +                              | -                        | +                  | -                   | -                  | -                     | +                      | +                    | +                       | -                        | -                    | 7           | SOL, TST, WASO, SQ, SE |
| Kayumov, 2001              | +                                     | -                       | +                              | -                        | -                  | -                   | -                  | -                     | +                      | -                    | -                       | -                        | -                    | 3           | SOL, TST, SQ, SE       |
| Kunz, 2010                 | -                                     | -                       | +                              | -                        | -                  | -                   | -                  | -                     | -                      | -                    | -                       | -                        | -                    | 1           | SOL, TST, SQ           |
| Lemoine, 2007              | -                                     | -                       | +                              | -                        | +                  | +                   | -                  | -                     | -                      | -                    | -                       | +                        | -                    | 4           | SQ                     |
| Luthringer, 2009           | -                                     | -                       | +                              | -                        | +                  | +                   | -                  | -                     | -                      | -                    | -                       | -                        | -                    | 3           | SOL, TST, SQ           |
| MacFarlane, 1991           | -                                     | -                       | -                              | -                        | -                  | -                   | -                  | -                     | +                      | -                    | -                       | -                        | -                    | 1           | TST                    |
| Medeiros, 2007             | -                                     | -                       | -                              | -                        | -                  | -                   | -                  | +                     | -                      | -                    | -                       | -                        | -                    | 1           | TST, SE                |
| Montes, 2002               | -                                     | -                       | +                              | -                        | -                  | -                   | -                  | -                     | -                      | -                    | -                       | -                        | -                    | 1           | TST                    |
| Montes, 2003               | +                                     | +                       | -                              | -                        | -                  | -                   | -                  | -                     | -                      | -                    | -                       | -                        | -                    | 2           | SOL, WASO, SQ, SE      |
| Munday, 2005               | -                                     | -                       | +                              | -                        | -                  | -                   | -                  | -                     | -                      | -                    | -                       | -                        | -                    | 1           | TST, SQ                |
| Nagtegaal, 1995            | -                                     | -                       | +                              | -                        | -                  | -                   | -                  | -                     | -                      | -                    | -                       | -                        | -                    | 1           | SOL                    |
| Nagtegaal, 1998            | -                                     | -                       | -                              | -                        | -                  | -                   | -                  | -                     | +                      | -                    | -                       | -                        | -                    | 1           | SOL, TST, SQ, SE       |
| Riemersma, 2008a and 2008b | -                                     | -                       | -                              | -                        | -                  | -                   | +                  | -                     | -                      | -                    | -                       | -                        | -                    | 1           | TST, SE                |
| Serfaty, 2002              | -                                     | -                       | -                              | -                        | -                  | -                   | +                  | +                     | -                      | -                    | -                       | -                        | -                    | 2           | TST, SE                |
| Singer, 2003a and 2003b    | -                                     | -                       | -                              | +                        | -                  | -                   | +                  | +                     | -                      | -                    | -                       | -                        | -                    | 3           | TST, WASO, SQ, SE      |
| Smiths, 2001               | -                                     | -                       | -                              | -                        | +                  | -                   | -                  | -                     | -                      | -                    | -                       | -                        | -                    | 1           | SOL, TST               |
| Smiths, 2003               | +                                     | -                       | -                              | -                        | +                  | -                   | -                  | -                     | -                      | -                    | -                       | -                        | -                    | 2           | SOL, TST               |
| Sugaya, 2007               | -                                     | -                       | -                              | -                        | -                  | -                   | -                  | -                     | -                      | -                    | -                       | -                        | +                    | 1           | QoL                    |
| Van Geijlswijk, 2011       | -                                     | -                       | -                              | -                        | +                  | -                   | -                  | -                     | -                      | -                    | -                       | -                        | -                    | 1           | SOL                    |
| Wade, 2007                 | -                                     | -                       | +                              | +                        | +                  | +                   | -                  | -                     | -                      | -                    | -                       | +                        | -                    | 5           | SOL, SQ                |
| Wade, 2011                 | -                                     | -                       | +                              | -                        | +                  | -                   | -                  | -                     | -                      | -                    | -                       | -                        | -                    | 2           | SOL, TST, SQ           |
| Wade, 2014                 | -                                     | -                       | -                              | -                        | -                  | -                   | -                  | +                     | -                      | -                    | -                       | -                        | -                    | 1           | WASO                   |
| Zhdanova, 2001             | +                                     | +                       | +                              | -                        | +                  | -                   | -                  | -                     | -                      | -                    | -                       | -                        | -                    | 4           | SOL, TST,              |

| Primary Studies | Buscemi, 2004*<br>n = 12 <sup>1</sup> | Buscemi, 2005*<br>n = 8 | Ferracioli-Oda, 2013*<br>n = 8 | McCleery, 2016*<br>n = 2 | Lee, NA*<br>n = 15 | Sateia, 2017* n = 3 | Xu, 2015*<br>n = 8 | Zhang, 2016*<br>n = 4 | Bellon, 2006<br>n = 13 | Chase, 1997<br>n = 2 | Costello, 2014<br>n = 1 | Culpepper, 2015<br>n = 3 | Vural, 2014<br>n = 1 | Times Cited | Outcome(s)   |
|-----------------|---------------------------------------|-------------------------|--------------------------------|--------------------------|--------------------|---------------------|--------------------|-----------------------|------------------------|----------------------|-------------------------|--------------------------|----------------------|-------------|--------------|
|                 |                                       |                         |                                |                          |                    |                     |                    |                       |                        |                      |                         |                          |                      |             | WASO, SQ, SE |

<sup>1</sup>Unable to determine some of the primary studies associated with this review

\*systematic review with meta-analysis

**Table F7. Primary studies across included systematic reviews that compared diphenhydramine to inactive controls**

| Primary Studies | Sateia, 2017*<br>n = 2 | Culpepper, 2015<br>n = 3 | Vande Griend, 2012<br>n = 4 | Times Cited | Outcome(s)        |
|-----------------|------------------------|--------------------------|-----------------------------|-------------|-------------------|
| Glass, 2008     | +                      | +                        | +                           | 3           | SOL, TST, SQ, SE  |
| Morin, 2005     | +                      | +                        | +                           | 3           | SOL, TST, SE, ISI |
| Katayose, 2012  | --                     | +                        | --                          | 1           | SOL               |
| Rickels, 1983   | --                     | --                       | +                           | 1           | SOL, TST          |
| Meuleman, 1987  | --                     | --                       | +                           | 1           | SOL, TST, WASO    |

\*systematic review with meta-analysis

**Table F8. Primary studies across included systematic reviews that compared cognitive behavioural interventions to inactive controls**

| Primary Studies<br>(n = 89) | Sleep Onset Latency   |                    |                 |                     |                          |                                      |                  |                   |                                    |                              |                      |                      |                         |                     |                                       |                       |                                   |                         |                    |                     |                    |                   | Times Cited |                       |                      |   |
|-----------------------------|-----------------------|--------------------|-----------------|---------------------|--------------------------|--------------------------------------|------------------|-------------------|------------------------------------|------------------------------|----------------------|----------------------|-------------------------|---------------------|---------------------------------------|-----------------------|-----------------------------------|-------------------------|--------------------|---------------------|--------------------|-------------------|-------------|-----------------------|----------------------|---|
|                             | Brasure, 2015* n = 21 | Cheng, 2012* n = 4 | Ho, 2016* n = 4 | Koffel, 2015* n = 6 | Navarro-Bravo, 2015* n=7 | van Straten, 2007* n=10 <sup>2</sup> | Ye, 2016* n = 15 | Yang, 2014* n = 1 | Buscemi, 2005* n = 13 <sup>2</sup> | Ho, 2015* n = 8 <sup>2</sup> | Johnson, 2016* n = 7 | Trauer, 2015* n = 16 | Montgomery, 2003* n = 3 | Irwin, 2006* n = 20 | van Straten, 2009* n = 8 <sup>2</sup> | Seyffert, 2016* n = 7 | Okajima, 2011* n = 9 <sup>2</sup> | Zachariae, 2016* n = 10 | Howell, 2014 n = 3 | McCurry, 2007 n = 1 | Brooks, 2014 n = 1 | Ishak, 2012 n = 1 |             | Dickerson, 2014 n = 1 | Venables, 2014 n = 8 |   |
| Altena, 2008                | --                    | --                 | --              | --                  | --                       | --                                   | --               | --                | --                                 | --                           | --                   | +                    | --                      | --                  | --                                    | --                    | --                                | --                      | --                 | --                  | --                 | --                | --          | --                    | --                   | 1 |
| Arnedt, 2013                | +                     | --                 | --              | --                  | --                       | --                                   | --               | --                | --                                 | --                           | --                   | --                   | --                      | --                  | --                                    | --                    | --                                | --                      | --                 | --                  | --                 | --                | --          | --                    | --                   | 1 |
| Ascher, 1979                | --                    | --                 | --              | --                  | --                       | --                                   | --               | --                | +                                  | --                           | --                   | --                   | --                      | --                  | --                                    | --                    | --                                | --                      | --                 | --                  | --                 | --                | --          | --                    | --                   | 1 |
| Berger, 2009                | --                    | --                 | --              | --                  | --                       | --                                   | --               | --                | --                                 | --                           | --                   | --                   | --                      | --                  | --                                    | --                    | --                                | --                      | --                 | --                  | --                 | --                | --          | +                     | --                   | 1 |
| Blom, 2015a                 | --                    | --                 | --              | --                  | --                       | --                                   | +                | --                | --                                 | --                           | --                   | --                   | --                      | --                  | --                                    | --                    | --                                | --                      | --                 | --                  | --                 | --                | --          | --                    | --                   | 1 |
| Blom, 2015b                 | --                    | --                 | --              | --                  | --                       | --                                   | +                | --                | --                                 | --                           | --                   | --                   | --                      | --                  | --                                    | --                    | --                                | --                      | --                 | --                  | --                 | --                | --          | --                    | --                   | 1 |
| Bothelius, 2013             | +                     | --                 | --              | --                  | --                       | --                                   | --               | --                | --                                 | --                           | --                   | +                    | --                      | --                  | --                                    | --                    | --                                | --                      | --                 | --                  | --                 | --                | --          | --                    | --                   | 2 |
| Buysse, 2011                | --                    | --                 | --              | --                  | --                       | --                                   | --               | --                | --                                 | --                           | --                   | +                    | --                      | --                  | --                                    | --                    | --                                | --                      | --                 | --                  | --                 | --                | --          | --                    | --                   | 1 |
| Carr-Kaffashan, 1979        | --                    | --                 | --              | --                  | --                       | --                                   | --               | --                | --                                 | --                           | --                   | --                   | --                      | +                   | --                                    | --                    | --                                | --                      | --                 | --                  | --                 | --                | --          | --                    | --                   | 1 |
| Chen, 2008                  | --                    | --                 | --              | --                  | --                       | --                                   | --               | +                 | --                                 | --                           | --                   | --                   | --                      | --                  | --                                    | --                    | --                                | --                      | --                 | --                  | --                 | --                | --          | --                    | --                   | 1 |
| Chen, 2011                  | --                    | --                 | --              | --                  | +                        | --                                   | --               | --                | --                                 | --                           | --                   | --                   | --                      | --                  | --                                    | --                    | --                                | --                      | --                 | --                  | --                 | --                | --          | --                    | --                   | 1 |
| Currie, 2000                | --                    | --                 | --              | +                   | +                        | --                                   | --               | --                | --                                 | --                           | --                   | --                   | --                      | --                  | --                                    | --                    | --                                | --                      | --                 | --                  | --                 | --                | --          | --                    | --                   | 2 |
| Currie, 2014                | --                    | --                 | --              | --                  | --                       | --                                   | --               | --                | --                                 | --                           | --                   | --                   | --                      | --                  | --                                    | --                    | --                                | --                      | --                 | --                  | --                 | +                 | --          | --                    | --                   | 1 |







|                      |    |    |    |    |    |    |    |    |    |    |    |    |    |    |    |    |    |    |    |    |    |    |    |    |   |   |
|----------------------|----|----|----|----|----|----|----|----|----|----|----|----|----|----|----|----|----|----|----|----|----|----|----|----|---|---|
| McCrae,<br>2007      | -- | -- | -- | -- | -- | -- | -- | -- | -- | -- | -- | -- | +  | -- | -- | -- | -- | -- | -- | -- | -- | -- | -- | -- | 1 |   |
| Mimeault,<br>1999    | +  | -- | -- | -- | -- | -- | -- | -- | -- | -- | -- | -- | -- | -- | -- | -- | -- | -- | -- | -- | -- | -- | -- | -- | 1 |   |
| Morawetz,<br>1989    | -- | -- | -- | -- | -- | -- | -- | -- | -- | -- | -- | -- | -- | +  | -- | -- | -- | -- | -- | -- | -- | -- | -- | -- | 1 |   |
| Morin,<br>1988       | -- | -- | -- | -- | -- | -- | -- | -- | -- | -- | -- | -- | +  | +  | -- | -- | -- | -- | -- | -- | -- | -- | -- | -- | 2 |   |
| Morin,<br>1993       | +  | -- | -- | +  | -- | -- | -- | -- | -- | -- | -- | +  | +  | +  | -- | -- | -- | -- | -- | -- | -- | -- | -- | -- | 5 |   |
| Nicassio,<br>1974    | -- | -- | -- | -- | -- | -- | -- | -- | -- | -- | -- | -- | -- | +  | -- | -- | -- | -- | -- | -- | -- | -- | -- | -- | 1 |   |
| Nicassio,<br>1982    | -- | -- | -- | -- | -- | -- | -- | -- | -- | -- | -- | -- | -- | +  | -- | -- | -- | -- | -- | -- | -- | -- | -- | -- | 1 |   |
| Pallesen,<br>2003    | -- | -- | -- | -- | -- | -- | -- | -- | -- | -- | -- | -- | -- | +  | -- | -- | -- | -- | -- | -- | -- | -- | -- | -- | 1 |   |
| Pillai,<br>2015      | -- | -- | -- | -- | -- | -- | -- | -- | -- | -- | -- | -- | -- | -- | -- | -- | -- | +  | -- | -- | -- | -- | -- | -- | 1 |   |
| Puder,<br>1983       | -- | -- | -- | -- | -- | -- | -- | -- | -- | -- | -- | -- | -- | +  | -- | -- | -- | -- | -- | -- | -- | -- | -- | -- | 1 |   |
| Quesnel,<br>2003     | -- | -- | -- | -- | -- | -- | -- | -- | -- | -- | -- | -- | -- | -- | -- | -- | -- | -- | -- | -- | -- | -- | +  | +  | 2 |   |
| Raymond,<br>2010     | -- | -- | -- | -- | -- | -- | -- | -- | -- | -- | -- | -- | -- | -- | -- | -- | -- | -- | -- | -- | -- | -- | -- | -- | + | 1 |
| Riedel,<br>1995      | -- | -- | -- | -- | -- | -- | -- | -- | -- | -- | -- | -- | -- | +  | -- | -- | -- | -- | -- | -- | -- | -- | -- | -- | 1 |   |
| Ritterband<br>, 2009 | +  | +  | -- | -- | -- | -- | +  | -- | -- | -- | -- | -- | -- | -- | -- | +  | -- | +  | -- | -- | -- | -- | -- | -- | 5 |   |
| Ritterband<br>, 2012 | -- | +  | -- | -- | -- | -- | +  | -- | -- | -- | +  | -- | -- | -- | -- | -- | -- | +  | +  | -- | -- | -- | -- | -- | 5 |   |
| Rybarczyk<br>, 2002  | -- | -- | -- | +  | -- | -- | -- | -- | -- | -- | -- | -- | -- | +  | -- | -- | -- | -- | -- | -- | -- | -- | -- | -- | 2 |   |
| Rybarczyk<br>, 2005  | +  | -- | -- | -- | +  | -- | -- | -- | -- | -- | -- | -- | -- | -- | -- | -- | -- | -- | -- | +  | -- | -- | -- | -- | 3 |   |
| Sanavio,<br>1990     | -- | -- | -- | -- | -- | -- | -- | -- | +  | -- | -- | -- | -- | -- | -- | -- | -- | -- | -- | -- | -- | -- | -- | -- | 1 |   |
| Savard,<br>2005      | -- | -- | -- | -- | +  | -- | -- | -- | -- | -- | +  | -- | -- | -- | -- | -- | -- | -- | +  | -- | -- | -- | -- | +  | 4 |   |



|                           |                                 |                           |                        |                            |                                   |                                             |                         |                              |                             |                                     |                            |                                |                                          |                              |                             |                                            |                                |                           |                         |                    |    |   |
|---------------------------|---------------------------------|---------------------------|------------------------|----------------------------|-----------------------------------|---------------------------------------------|-------------------------|------------------------------|-----------------------------|-------------------------------------|----------------------------|--------------------------------|------------------------------------------|------------------------------|-----------------------------|--------------------------------------------|--------------------------------|---------------------------|-------------------------|--------------------|----|---|
| Woolfolk, 1983            | --                              | --                        | --                     | --                         | --                                | --                                          | --                      | --                           | --                          | --                                  | --                         | --                             | --                                       | --                           | --                          | --                                         | --                             | --                        | --                      | --                 | -- | 1 |
| Wu, 2006                  | +                               | --                        | --                     | --                         | --                                | --                                          | --                      | --                           | --                          | +                                   | --                         | --                             | --                                       | --                           | --                          | --                                         | --                             | --                        | --                      | --                 | -- | 2 |
| Primary Studies<br>n = 72 | <b>Brasure, 2015*</b><br>n = 15 | <b>Cheng, 2012*</b> n = 4 | <b>Ho, 2016*</b> n = 4 | <b>Koffel, 2015*</b> n = 6 | <b>Navarro-Bravo, 2015*</b> n = 8 | <b>van Straten, 2007*</b> n=10 <sup>2</sup> | <b>Ye, 2016*</b> n = 15 | <b>Dickerson, 2014</b> n = 2 | <b>Venables, 2014</b> n = 8 | <b>Ho, 2015*</b> n = 8 <sup>2</sup> | <b>Irwin, 2006*</b> n = 15 | <b>Montgomery, 2003*</b> n = 4 | <b>Okajima, 2011*</b> n = 9 <sup>2</sup> | <b>Seyffert, 2016*</b> n = 8 | <b>Trauer, 2015*</b> n = 16 | <b>van Straten, 2009*</b> n=8 <sup>2</sup> | <b>Zachariae, 2016*</b> n = 10 | <b>Howell, 2014</b> n = 2 | <b>Wang, 2005</b> n = 2 | <b>Times Cited</b> |    |   |
| <b>Total Sleep Time</b>   |                                 |                           |                        |                            |                                   |                                             |                         |                              |                             |                                     |                            |                                |                                          |                              |                             |                                            |                                |                           |                         |                    |    |   |
| Arnedt, 2013              | +                               | --                        | --                     | --                         | --                                | --                                          | --                      | --                           | --                          | --                                  | --                         | --                             | --                                       | --                           | --                          | --                                         | --                             | --                        | --                      | --                 | -- | 1 |
| Barsevick, 2010           | --                              | --                        | --                     | --                         | --                                | --                                          | --                      | --                           | --                          | --                                  | --                         | --                             | --                                       | --                           | --                          | --                                         | --                             | +                         | --                      | --                 | -- | 1 |
| Berger, 2009              | --                              | --                        | --                     | --                         | --                                | --                                          | --                      | --                           | +                           | --                                  | --                         | --                             | --                                       | --                           | --                          | --                                         | --                             | --                        | --                      | --                 | -- | 1 |
| Blom, 2015a               | --                              | --                        | --                     | --                         | --                                | --                                          | +                       | --                           | --                          | --                                  | --                         | --                             | --                                       | --                           | --                          | --                                         | --                             | --                        | --                      | --                 | -- | 1 |
| Blom, 2015b               | --                              | --                        | --                     | --                         | --                                | --                                          | +                       | --                           | --                          | --                                  | --                         | --                             | --                                       | --                           | --                          | --                                         | --                             | --                        | --                      | --                 | -- | 1 |
| Bothelius, 2013           | --                              | --                        | --                     | --                         | --                                | --                                          | --                      | --                           | --                          | --                                  | --                         | --                             | --                                       | --                           | +                           | --                                         | --                             | --                        | --                      | --                 | -- | 1 |
| Buysse, 2011              | --                              | --                        | --                     | --                         | --                                | --                                          | --                      | --                           | --                          | --                                  | --                         | --                             | --                                       | --                           | +                           | --                                         | --                             | --                        | --                      | --                 | -- | 1 |
| Chen, 2001                | --                              | --                        | --                     | --                         | +                                 | +                                           | --                      | --                           | --                          | --                                  | --                         | --                             | --                                       | --                           | --                          | --                                         | --                             | --                        | --                      | --                 | -- | 1 |
| Currie, 2000              | --                              | --                        | --                     | +                          | +                                 | --                                          | --                      | --                           | --                          | --                                  | --                         | --                             | --                                       | --                           | --                          | --                                         | --                             | --                        | --                      | --                 | -- | 2 |
| Davidson, 2001            | --                              | --                        | --                     | --                         | --                                | --                                          | --                      | --                           | +                           | --                                  | --                         | --                             | --                                       | --                           | --                          | --                                         | --                             | --                        | --                      | --                 | -- | 1 |
| Dirksen, 2008             | --                              | --                        | --                     | --                         | --                                | --                                          | --                      | --                           | +                           | --                                  | --                         | --                             | --                                       | --                           | --                          | --                                         | --                             | --                        | --                      | --                 | -- | 1 |
| Edinger and Sampson, 2003 | --                              | --                        | --                     | --                         | --                                | --                                          | --                      | --                           | --                          | --                                  | --                         | --                             | --                                       | --                           | +                           | --                                         | --                             | --                        | --                      | --                 | -- | 1 |
| Edinger, 2001             | +                               | --                        | --                     | --                         | --                                | --                                          | --                      | --                           | --                          | --                                  | +                          | --                             | --                                       | --                           | +                           | --                                         | --                             | --                        | --                      | +                  | -- | 4 |
| Edinger, 2003             | +                               | --                        | --                     | --                         | --                                | --                                          | --                      | --                           | --                          | --                                  | +                          | --                             | --                                       | --                           | --                          | --                                         | --                             | --                        | --                      | --                 | -- | 2 |
| Edinger, 2007             | --                              | --                        | --                     | --                         | --                                | --                                          | --                      | --                           | --                          | --                                  | --                         | --                             | --                                       | --                           | +                           | --                                         | --                             | --                        | --                      | --                 | -- | 1 |
| Edinger, 2009             | +                               | --                        | --                     | --                         | --                                | --                                          | --                      | --                           | --                          | --                                  | --                         | --                             | --                                       | --                           | +                           | --                                         | --                             | --                        | --                      | --                 | -- | 2 |
| Epstein and Dirksen, 2007 | --                              | --                        | --                     | +                          | +                                 | --                                          | --                      | --                           | +                           | --                                  | --                         | --                             | --                                       | --                           | --                          | --                                         | --                             | --                        | --                      | --                 | -- | 3 |
| Epstein, 2012             | --                              | --                        | --                     | --                         | +                                 | --                                          | --                      | --                           | --                          | --                                  | --                         | --                             | --                                       | --                           | --                          | --                                         | --                             | --                        | --                      | --                 | -- | 1 |
| Espie, 2001               | --                              | --                        | --                     | --                         | --                                | --                                          | --                      | --                           | --                          | --                                  | +                          | --                             | --                                       | --                           | --                          | --                                         | --                             | --                        | --                      | --                 | -- | 1 |
| Espie, 2003               | --                              | --                        | --                     | --                         | --                                | --                                          | --                      | --                           | --                          | --                                  | +                          | --                             | --                                       | --                           | --                          | --                                         | --                             | --                        | --                      | --                 | -- | 1 |
| Espie, 2006               | --                              | --                        | --                     | --                         | --                                | --                                          | --                      | --                           | +                           | --                                  | --                         | --                             | --                                       | --                           | --                          | --                                         | --                             | --                        | --                      | --                 | -- | 1 |
| Espie, 2007               | +                               | --                        | --                     | +                          | +                                 | --                                          | --                      | --                           | --                          | --                                  | --                         | --                             | --                                       | --                           | +                           | --                                         | --                             | --                        | --                      | --                 | -- | 4 |
| Espie, 2008a              | --                              | --                        | --                     | --                         | --                                | --                                          | --                      | +                            | +                           | --                                  | --                         | --                             | --                                       | --                           | --                          | --                                         | --                             | --                        | --                      | --                 | -- | 2 |
| Espie, 2008b              | --                              | --                        | --                     | --                         | --                                | --                                          | --                      | +                            | --                          | --                                  | --                         | --                             | --                                       | --                           | --                          | --                                         | --                             | --                        | --                      | --                 | -- | 1 |
| Espie, 2012               | +                               | --                        | --                     | --                         | --                                | --                                          | +                       | --                           | --                          | --                                  | --                         | --                             | --                                       | +                            | --                          | --                                         | +                              | --                        | --                      | --                 | -- | 4 |

|                  |    |    |    |    |    |    |    |    |    |    |    |    |    |    |    |    |    |    |   |
|------------------|----|----|----|----|----|----|----|----|----|----|----|----|----|----|----|----|----|----|---|
| Fiorentino, 2008 | -- | -- | -- | -- | -- | -- | -- | -- | +  | -- | -- | -- | -- | -- | -- | -- | -- | -- | 1 |
| Ho, 2014         | -- | -- | -- | -- | -- | -- | +  | -- | -- | -- | -- | -- | -- | +  | -- | -- | +  | -- | 3 |
| Holmqvist, 2014  | -- | -- | -- | -- | -- | -- | +  | -- | -- | -- | -- | -- | -- | -- | -- | -- | -- | -- | 1 |
| Jacobs, 2004     | +  | -- | -- | -- | -- | -- | -- | -- | -- | -- | -- | -- | -- | -- | +  | -- | -- | -- | 2 |
| Jernelov, 2012   | +  | -- | -- | -- | -- | -- | -- | -- | -- | -- | -- | -- | -- | -- | -- | -- | -- | -- | 1 |
| Kaldo, 2015      | -- | -- | -- | -- | -- | -- | +  | -- | -- | -- | -- | -- | -- | +  | -- | -- | -- | -- | 2 |
| Lancee, 2012     | -- | -- | -- | -- | -- | -- | +  | -- | -- | -- | -- | -- | -- | +  | -- | -- | +  | -- | 3 |
| Lancee, 2013a    | -- | -- | -- | -- | -- | -- | +  | -- | -- | -- | -- | -- | -- | -- | -- | -- | -- | -- | 1 |
| Lancee, 2013b    | -- | -- | -- | -- | -- | -- | +  | -- | -- | -- | -- | -- | -- | -- | -- | -- | -- | -- | 1 |
| Lancee, 2015     | -- | -- | -- | -- | -- | -- | +  | -- | -- | -- | -- | -- | -- | -- | -- | -- | -- | -- | 1 |
| Lichstein, 2001  | -- | -- | -- | -- | -- | -- | -- | -- | -- | -- | +  | +  | -- | -- | -- | -- | -- | -- | 2 |
| Lick, 1977       | -- | -- | -- | -- | -- | -- | -- | -- | -- | -- | +  | -- | -- | -- | -- | -- | -- | -- | 1 |
| Lovato, 2014     | -- | -- | -- | -- | -- | -- | -- | -- | -- | -- | -- | -- | -- | -- | +  | -- | -- | -- | 1 |
| Mack, 2013       | -- | -- | +  | -- | -- | -- | -- | -- | -- | -- | -- | -- | -- | -- | -- | -- | -- | -- | 1 |
| Margolies, 2013  | -- | -- | +  | -- | -- | -- | -- | -- | -- | -- | -- | -- | -- | -- | -- | -- | -- | -- | 1 |
| Matthews, 2010   | -- | -- | -- | -- | -- | -- | -- | -- | +  | -- | -- | -- | -- | -- | -- | -- | -- | -- | 1 |
| McCrae, 2007     | -- | -- | -- | -- | -- | -- | -- | -- | -- | -- | -- | -- | -- | -- | +  | -- | -- | -- | 1 |
| Mimeault, 1999   | +  | -- | -- | -- | -- | -- | -- | -- | -- | -- | -- | -- | -- | -- | -- | -- | -- | -- | 2 |
| Morawetz, 1989   | -- | -- | -- | -- | -- | -- | -- | -- | -- | -- | +  | -- | -- | -- | -- | -- | -- | -- | 1 |
| Morin, 1988      | -- | -- | -- | -- | -- | -- | -- | -- | -- | -- | +  | +  | -- | -- | -- | -- | -- | -- | 2 |
| Morin, 1993      | -- | -- | -- | +  | -- | -- | -- | -- | -- | -- | +  | +  | -- | -- | +  | -- | -- | -- | 4 |
| Morin, 1999      | -- | -- | -- | -- | +  | -- | -- | -- | -- | -- | +  | +  | -- | -- | +  | -- | -- | -- | 4 |
| Pallesen, 2003   | -- | -- | -- | -- | -- | -- | -- | -- | -- | -- | +  | -- | -- | -- | -- | -- | -- | -- | 1 |
| Pillai, 2015     | -- | -- | -- | -- | -- | -- | -- | -- | -- | -- | -- | -- | -- | -- | -- | -- | +  | -- | 1 |
| Quesnel, 2003    | -- | -- | -- | -- | -- | -- | -- | -- | +  | -- | -- | -- | -- | -- | -- | -- | -- | -- | 1 |
| Raymond, 2010    | -- | -- | -- | -- | -- | -- | -- | -- | +  | -- | -- | -- | -- | -- | -- | -- | -- | -- | 1 |
| Riedel, 1995     | -- | -- | -- | -- | -- | -- | -- | -- | -- | -- | +  | -- | -- | -- | -- | -- | -- | -- | 1 |
| Ritterband, 2009 | +  | +  | -- | -- | -- | -- | +  | -- | -- | -- | -- | -- | -- | +  | -- | -- | +  | -- | 5 |
| Ritterband, 2012 | -- | +  | -- | -- | -- | -- | +  | -- | -- | -- | -- | -- | -- | -- | -- | -- | +  | -- | 3 |
| Rybarczyk, 2002  | -- | -- | -- | +  | -- | -- | -- | -- | -- | -- | +  | -- | -- | -- | -- | -- | -- | -- | 2 |
| Rybarczyk, 2005  | -- | -- | -- | -- | +  | -- | -- | -- | -- | -- | -- | -- | -- | -- | -- | -- | -- | -- | 1 |
| Savard, 2005     | -- | -- | -- | -- | +  | -- | -- | -- | +  | -- | -- | -- | -- | -- | -- | -- | -- | +  | 3 |
| Savard, 2013     | -- | -- | -- | -- | -- | -- | -- | -- | +  | -- | -- | -- | -- | -- | -- | -- | -- | -- | 1 |
| Sivertsen, 2006  | -- | -- | -- | -- | -- | -- | -- | -- | -- | -- | -- | -- | -- | -- | +  | -- | -- | -- | 1 |
| Soeffing, 2008   | -- | -- | -- | -- | -- | -- | -- | -- | -- | -- | -- | -- | -- | -- | +  | -- | -- | -- | 1 |
| Strom, 2004      | +  | +  | -- | -- | -- | -- | +  | -- | -- | -- | -- | -- | -- | +  | -- | -- | +  | -- | 5 |
| Suzuki, 2008     | -- | -- | -- | -- | -- | -- | -- | -- | -- | -- | -- | -- | -- | -- | -- | -- | +  | -- | 1 |













|                   |    |    |    |    |    |    |    |    |    |    |    |    |    |    |    |    |    |    |   |
|-------------------|----|----|----|----|----|----|----|----|----|----|----|----|----|----|----|----|----|----|---|
| Fiorentino, 2009  | -- | -- | -- | -- | -- | -- | -- | -- | -- | -- | -- | -- | -- | -- | -- | -- | +  | -- | 1 |
| Garland, 2014     | -- | -- | -- | -- | -- | -- | -- | -- | -- | -- | -- | -- | +  | -- | -- | -- | -- | -- | 1 |
| Ho, 2014          | -- | -- | -- | -- | -- | -- | -- | -- | -- | -- | -- | -- | -- | -- | -- | +  | -- | -- | 1 |
| Jungquist, 2010   | -- | -- | -- | -- | -- | -- | -- | -- | -- | -- | -- | -- | +  | -- | -- | -- | -- | -- | 1 |
| Krakow, 2001      | -- | +  | -- | -- | -- | -- | -- | -- | -- | -- | -- | -- | -- | -- | -- | -- | -- | -- | 1 |
| Lichstein, 2000   | -- | -- | -- | -- | -- | -- | -- | -- | -- | -- | -- | -- | -- | -- | -- | -- | -- | +  | 1 |
| Lichstein, 2001   | -- | -- | -- | -- | -- | -- | -- | -- | -- | -- | +  | -- | -- | -- | -- | -- | -- | -- | 1 |
| Lick, 1977        | -- | -- | -- | -- | -- | -- | -- | -- | -- | -- | +  | -- | -- | -- | -- | -- | -- | -- | 1 |
| Lu, 2016          | -- | -- | -- | -- | -- | -- | +  | -- | -- | -- | -- | -- | -- | -- | -- | -- | -- | -- | 1 |
| Mack, 2013        | -- | +  | -- | -- | -- | -- | -- | -- | -- | -- | -- | -- | -- | -- | -- | -- | -- | -- | 1 |
| Margolies, 2013   | -- | +  | -- | -- | -- | -- | -- | -- | -- | -- | -- | -- | -- | -- | -- | -- | -- | -- | 1 |
| Martinez, 2014    | -- | -- | -- | -- | -- | -- | -- | -- | -- | -- | -- | -- | +  | -- | -- | -- | -- | -- | 1 |
| McCurry, 1998     | -- | -- | -- | -- | -- | -- | -- | -- | -- | -- | -- | -- | -- | -- | -- | -- | -- | +  | 1 |
| Mimeault, 1999    | +  | -- | -- | -- | -- | -- | -- | -- | -- | -- | -- | -- | -- | -- | -- | -- | -- | -- | 1 |
| Miro, 2011        | -- | -- | +  | +  | -- | -- | -- | -- | -- | -- | -- | -- | +  | -- | -- | -- | -- | -- | 3 |
| Rambod, 2013      | -- | -- | -- | -- | -- | -- | -- | -- | -- | +  | -- | -- | -- | -- | -- | -- | -- | -- | 1 |
| Riedel, 1995      | -- | -- | -- | -- | -- | -- | -- | -- | -- | -- | +  | -- | -- | -- | -- | -- | -- | -- | 1 |
| Ritterband, 2009  | -- | -- | -- | -- | -- | +  | -- | -- | -- | -- | -- | -- | -- | -- | -- | +  | -- | -- | 2 |
| Ritterband, 2012  | -- | -- | -- | -- | -- | +  | -- | -- | -- | -- | -- | -- | +  | -- | -- | +  | -- | -- | 3 |
| Rybarczyk, 2002   | -- | -- | +  | -- | -- | -- | -- | -- | -- | -- | -- | -- | -- | -- | -- | -- | -- | +  | 2 |
| Rybarczyk, 2005   | -- | -- | -- | +  | -- | -- | -- | -- | -- | -- | -- | -- | -- | -- | -- | -- | -- | +  | 2 |
| Savard, 2005      | -- | -- | -- | -- | -- | -- | -- | -- | -- | -- | -- | -- | +  | -- | -- | -- | -- | -- | 1 |
| Strom, 2004       | -- | -- | -- | -- | -- | +  | -- | -- | -- | -- | -- | -- | -- | -- | -- | +  | -- | -- | 2 |
| Suzuki, 2008      | -- | -- | -- | -- | -- | -- | -- | -- | -- | -- | -- | -- | -- | -- | -- | +  | -- | -- | 1 |
| Turner, 1979      | -- | -- | -- | -- | -- | -- | -- | -- | -- | -- | +  | -- | -- | -- | -- | -- | -- | -- | 1 |
| Turner, 1982      | -- | -- | -- | -- | -- | -- | -- | -- | -- | -- | +  | -- | -- | -- | -- | -- | -- | -- | 1 |
| Ulmer, 2011       | -- | +  | -- | -- | -- | -- | -- | -- | -- | -- | -- | -- | -- | -- | -- | -- | -- | -- | 1 |
| Van Straten, 2014 | +  | -- | -- | -- | -- | -- | -- | -- | -- | -- | -- | -- | -- | -- | -- | +  | -- | -- | 2 |
| Vincent, 2009     | -- | -- | -- | -- | -- | +  | -- | -- | -- | -- | -- | -- | -- | -- | -- | +  | -- | -- | 2 |







|                               |    |    |    |    |    |    |    |    |    |    |    |    |    |    |    |    |    |    |    |    |    |    |    |    |    |   |
|-------------------------------|----|----|----|----|----|----|----|----|----|----|----|----|----|----|----|----|----|----|----|----|----|----|----|----|----|---|
| Morin,<br>1993                | -- | -- | +  | -- | -- | -- | -- | -- | -- | -- | -- | -- | -- | -- | +  | -- | +  | -- | -- | +  | -- | -- | -- | -- | +  | 4 |
| Morin,<br>1999                | -- | -- | -- | +  | -- | -- | -- | -- | -- | -- | -- | -- | -- | -- | +  | -- | +  | -- | -- | +  | -- | -- | -- | -- | -- | 4 |
| Morin,<br>2004                | -- | -- | -- | -- | -- | -- | -- | -- | -- | -- | -- | -- | -- | -- | -- | -- | -- | -- | -- | -- | -- | -- | -- | +  | -- | 1 |
| Morin,<br>2012                | -- | -- | -- | -- | -- | -- | -- | -- | -- | -- | +  | -- | -- | -- | -- | -- | -- | -- | -- | -- | -- | -- | -- | -- | -- | 1 |
| Okajima,<br>2013              | -- | -- | -- | -- | -- | -- | -- | -- | -- | -- | -- | -- | -- | -- | -- | -- | -- | -- | -- | -- | -- | -- | -- | +  | -- | 1 |
| Ouellet<br>and Morin,<br>2007 | -- | -- | -- | -- | -- | -- | +  | -- | -- | -- | -- | -- | -- | -- | -- | -- | -- | -- | -- | -- | -- | -- | -- | -- | -- | 1 |
| Pallesen,<br>2003             | -- | -- | -- | -- | -- | -- | -- | -- | -- | -- | -- | -- | -- | -- | +  | -- | -- | -- | -- | -- | -- | -- | -- | -- | -- | 1 |
| Quesnel,<br>2003              | -- | -- | -- | -- | -- | -- | -- | -- | -- | -- | -- | +  | -- | -- | -- | -- | -- | -- | -- | -- | -- | -- | -- | -- | -- | 1 |
| Quesnel,<br>2003              | -- | -- | -- | -- | -- | -- | -- | -- | -- | -- | -- | +  | -- | -- | -- | -- | -- | -- | -- | -- | -- | -- | -- | -- | -- | 1 |
| Rambod,<br>2013               | -- | -- | -- | -- | -- | -- | -- | -- | -- | -- | -- | -- | +  | -- | -- | -- | -- | -- | -- | -- | -- | -- | -- | -- | -- | 1 |
| Raymond,<br>2010              | -- | -- | -- | -- | -- | -- | -- | -- | -- | -- | -- | +  | -- | -- | -- | -- | -- | -- | -- | -- | -- | -- | -- | -- | -- | 1 |
| Riedel,<br>1995               | -- | -- | -- | -- | -- | -- | -- | -- | -- | -- | -- | -- | -- | -- | +  | -- | -- | -- | -- | -- | -- | -- | -- | -- | -- | 1 |
| Ritterband,<br>2009           | +  | -- | -- | -- | -- | +  | -- | -- | -- | -- | -- | -- | -- | -- | -- | -- | -- | -- | +  | -- | -- | +  | -- | -- | -- | 4 |
| Ritterband,<br>2012           | +  | -- | -- | -- | -- | +  | -- | -- | -- | -- | -- | -- | -- | -- | -- | +  | -- | -- | -- | -- | -- | +  | +  | -- | -- | 5 |
| Rybarczyk,<br>2002            | -- | -- | +  | -- | -- | -- | -- | -- | -- | -- | -- | -- | -- | -- | +  | -- | -- | -- | -- | -- | -- | -- | -- | -- | +  | 3 |
| Rybarczyk,<br>2005            | -- | -- | -- | +  | -- | -- | -- | -- | -- | -- | -- | -- | -- | -- | -- | -- | -- | -- | -- | -- | -- | -- | -- | -- | +  | 1 |
| Savard,<br>2005               | -- | -- | -- | +  | -- | -- | -- | -- | -- | -- | -- | +  | -- | -- | -- | +  | -- | -- | -- | -- | -- | -- | -- | +  | -- | 4 |
| Savard,<br>2014 <sup>1</sup>  | -- | -- | -- | -- | -- | -- | -- | -- | -- | -- | -- | -- | -- | -- | -- | +  | -- | -- | -- | -- | -- | -- | -- | -- | -- | 1 |
| Sivertsen,<br>2006            | -- | -- | -- | -- | -- | -- | -- | -- | -- | -- | -- | -- | -- | -- | -- | -- | -- | -- | -- | +  | -- | -- | -- | -- | -- | 1 |

|                         |    |    |    |    |    |    |    |    |    |    |    |    |    |    |    |    |    |    |    |    |    |    |    |    |    |   |
|-------------------------|----|----|----|----|----|----|----|----|----|----|----|----|----|----|----|----|----|----|----|----|----|----|----|----|----|---|
| Soeffing,<br>2008       | -- | -- | -- | -- | -- | -- | -- | -- | -- | -- | -- | -- | -- | -- | -- | -- | -- | -- | -- | +  | -- | -- | -- | +  | -- | 2 |
| Strom,<br>2004          | +  | -- | -- | -- | -- | +  | -- | -- | -- | -- | -- | -- | -- | -- | -- | -- | -- | -- | +  | -- | -- | +  | -- | -- | -- | 4 |
| Suzuki,<br>2008         | -- | -- | -- | -- | -- | -- | -- | -- | -- | -- | -- | -- | -- | -- | -- | -- | -- | -- | -- | -- | -- | +  | -- | -- | -- | 1 |
| Talbot,<br>2014         | -- | +  | -- | -- | -- | -- | -- | -- | -- | -- | -- | -- | -- | -- | -- | -- | -- | -- | -- | -- | -- | -- | -- | +  | -- | 2 |
| Taylor,<br>2012         | -- | -- | -- | -- | -- | -- | -- | -- | -- | -- | -- | -- | -- | -- | -- | -- | -- | -- | -- | -- | -- | -- | -- | +  | -- | 1 |
| Taylor,<br>2014         | -- | -- | -- | -- | -- | -- | -- | -- | -- | -- | -- | -- | -- | -- | -- | -- | -- | -- | -- | +  | -- | -- | -- | -- | -- | 1 |
| Thiart,<br>2015         | -- | -- | -- | -- | -- | -- | -- | -- | -- | -- | -- | -- | -- | -- | -- | -- | -- | -- | +  | -- | -- | +  | -- | -- | -- | 2 |
| Ulmer,<br>2011          | -- | +  | -- | -- | -- | -- | -- | -- | -- | -- | -- | -- | -- | -- | -- | -- | -- | -- | -- | -- | -- | -- | -- | +  | -- | 2 |
| Ustinov,<br>2013        | -- | +  | -- | -- | -- | -- | -- | -- | -- | -- | -- | -- | -- | -- | -- | -- | -- | -- | -- | -- | -- | -- | -- | -- | -- | 1 |
| Van<br>Straten,<br>2013 | -- | -- | -- | -- | -- | -- | -- | -- | -- | -- | -- | -- | -- | -- | -- | -- | -- | -- | -- | -- | -- | +  | -- | -- | -- | 1 |
| Van<br>Straten,<br>2014 | -- | -- | -- | -- | -- | +  | -- | -- | -- | -- | -- | -- | -- | -- | -- | -- | -- | -- | +  | -- | -- | -- | -- | -- | -- | 2 |
| Vincent,<br>2009        | +  | -- | -- | -- | -- | +  | -- | -- | -- | -- | -- | -- | -- | -- | -- | -- | -- | -- | +  | -- | -- | +  | -- | -- | -- | 4 |
| Vitiello,<br>2009       | -- | -- | +  | -- | -- | -- | -- | -- | -- | -- | -- | -- | -- | -- | -- | -- | -- | -- | -- | -- | -- | -- | -- | -- | -- | 1 |
| Wagley,<br>2013         | -- | -- | -- | -- | -- | -- | -- | -- | -- | -- | -- | -- | -- | -- | -- | -- | -- | -- | -- | -- | -- | -- | -- | +  | -- | 1 |
| Wu, 2006                | -- | -- | -- | -- | -- | -- | -- | -- | -- | -- | -- | -- | -- | -- | -- | -- | -- | -- | -- | +  | -- | -- | -- | -- | -- | 1 |





|                         |                                               |                                 |                             |                             |                              |                    |    |    |    |    |    |    |    |    |    |   |
|-------------------------|-----------------------------------------------|---------------------------------|-----------------------------|-----------------------------|------------------------------|--------------------|----|----|----|----|----|----|----|----|----|---|
| Morin, 2007             |                                               |                                 |                             |                             |                              |                    |    |    |    |    |    |    |    |    |    |   |
| Pigeon, 2012            | +                                             | --                              | --                          | --                          | --                           | --                 | -- | -- | -- | -- | -- | -- | -- | -- | -- | 1 |
| Pillai, 2015            | --                                            | --                              | --                          | --                          | --                           | --                 | -- | -- | -- | -- | -- | -- | -- | +  | -- | 1 |
| Quesnel, 2003           | --                                            | --                              | --                          | --                          | --                           | --                 | -- | +  | -- | +  | -- | -- | -- | -- | -- | 2 |
| Raymond, 2010           | --                                            | --                              | --                          | --                          | --                           | --                 | -- | -- | -- | +  | -- | -- | -- | -- | -- | 1 |
| Ritterband, 2009        | +                                             | +                               | --                          | --                          | --                           | +                  | -- | -- | -- | -- | -- | -- | -- | +  | -- | 4 |
| Ritterband, 2011        | --                                            | --                              | --                          | --                          | --                           | --                 | -- | -- | -- | -- | -- | -- | -- | -- | +  | 1 |
| Ritterband, 2012        | --                                            | --                              | --                          | --                          | --                           | +                  | -- | -- | -- | +  | -- | -- | -- | +  | -- | 3 |
| Rybarczyk, 2005         | --                                            | --                              | --                          | +                           | --                           | --                 | -- | -- | -- | -- | -- | -- | -- | -- | -- | 1 |
| Savard, 2005            | --                                            | --                              | --                          | +                           | --                           | --                 | -- | -- | -- | +  | +  | -- | -- | -- | +  | 4 |
| Savard, 2011            | --                                            | --                              | --                          | --                          | --                           | --                 | -- | -- | -- | +  | -- | -- | -- | -- | -- | 1 |
| Savard, 2013            | --                                            | --                              | --                          | --                          | --                           | --                 | -- | -- | -- | +  | -- | -- | -- | -- | -- | 1 |
| Savard, 2014            | --                                            | --                              | --                          | --                          | --                           | --                 | -- | -- | -- | -- | +  | -- | -- | -- | -- | 2 |
| Smith, 2015             | +                                             | --                              | --                          | --                          | --                           | --                 | -- | -- | -- | -- | -- | -- | -- | -- | -- | 1 |
| Strom, 2004             | --                                            | --                              | --                          | --                          | --                           | +                  | -- | -- | -- | -- | -- | -- | -- | -- | -- | 1 |
| Talbot, 2014            | --                                            | --                              | +                           | --                          | --                           | --                 | -- | -- | -- | -- | -- | -- | -- | -- | -- | 1 |
| Tang, 2012              | +                                             | --                              | --                          | --                          | --                           | --                 | -- | -- | -- | -- | -- | -- | -- | -- | -- | 1 |
| Thiart, 2015            | --                                            | --                              | --                          | --                          | --                           | --                 | -- | -- | -- | -- | -- | -- | +  | +  | -- | 2 |
| Ulmer, 2011             | --                                            | --                              | +                           | --                          | --                           | --                 | -- | -- | -- | -- | -- | -- | -- | -- | -- | 1 |
| Ustinov, 2013           | --                                            | --                              | +                           | --                          | --                           | --                 | -- | -- | -- | -- | -- | -- | -- | -- | -- | 1 |
| Vincent, 2009           | +                                             | +                               | --                          | --                          | --                           | +                  | -- | -- | -- | -- | -- | -- | +  | +  | -- | 5 |
| Primary Studies n = 26  | <b>Ballesio, 2017*</b><br>n = 20 <sup>3</sup> | <b>Dickerson, 2014</b><br>n = 1 | <b>Yang, 2014*</b><br>n = 2 | <b>Tang, 2015*</b><br>n = 6 | <b>Howell, 2014</b><br>n = 2 | <b>Times Cited</b> |    |    |    |    |    |    |    |    |    |   |
| <b>Fatigue Severity</b> |                                               |                                 |                             |                             |                              |                    |    |    |    |    |    |    |    |    |    |   |
| Arendt, 2011            | +                                             | --                              | --                          | --                          | --                           | --                 |    |    |    |    |    |    |    |    |    |   |
| Barsevick, 2010         | --                                            | --                              | --                          | --                          | +                            | --                 |    |    |    |    |    |    |    |    |    |   |
| Berger, 2009            | --                                            | --                              | --                          | --                          | +                            | --                 |    |    |    |    |    |    |    |    |    |   |
| Chen, 2008              | +                                             | --                              | +                           | --                          | --                           | --                 |    |    |    |    |    |    |    |    |    |   |
| Chen, 2011              | +                                             | --                              | +                           | --                          | --                           | --                 |    |    |    |    |    |    |    |    |    |   |
| Davidson, 2001          | --                                            | +                               | --                          | --                          | --                           | --                 |    |    |    |    |    |    |    |    |    |   |
| Dirksen, 2008           | +                                             | --                              | --                          | --                          | --                           | --                 |    |    |    |    |    |    |    |    |    |   |

|                                       |                              |                                 |                             |                              |                    |    |
|---------------------------------------|------------------------------|---------------------------------|-----------------------------|------------------------------|--------------------|----|
| Espie, 2008                           | +                            | --                              | --                          | +                            | +                  | 2  |
| Ho, 2014                              | +                            | --                              | --                          | --                           | --                 | -- |
| Irwin, 2014                           | +                            | --                              | --                          | --                           | --                 | -- |
| Jernelov, 2012                        | +                            | --                              | --                          | --                           | --                 | -- |
| Kapella, 2011                         | +                            | --                              | --                          | --                           | --                 | -- |
| Lichstein, 2001                       | +                            | --                              | --                          | --                           | --                 | -- |
| Lovato, 2014                          | +                            | --                              | --                          | --                           | --                 | -- |
| Martinez, 2013                        | +                            | --                              | --                          | --                           | --                 | -- |
| Martinez, 2014                        | --                           | --                              | --                          | +                            | --                 | 1  |
| Matthews, 2014                        | +                            | --                              | --                          | --                           | --                 | -- |
| Morgan, 2012                          | +                            | --                              | --                          | --                           | --                 | -- |
| Pigeon, 2012                          | +                            | --                              | --                          | --                           | --                 | -- |
| Rios, 2013                            | +                            | --                              | --                          | +                            | --                 | 1  |
| Ritterband, 2011                      | --                           | --                              | --                          | --                           | +                  | 1  |
| Ritterband, 2012                      | +                            | --                              | --                          | +                            | --                 | 1  |
| Savard, 2005                          | +                            | --                              | --                          | --                           | --                 | -- |
| Savard, 2014                          | +                            | --                              | --                          | --                           | --                 | -- |
| Tang, 2012                            | +                            | --                              | --                          | --                           | --                 | -- |
| Vincent, 2009                         | +                            | --                              | --                          | --                           | --                 | -- |
| Primary Studies<br>n = 7              | <b>Brooks, 2014</b><br>n = 1 | <b>Dickerson, 2014</b><br>n = 2 | <b>Ishak, 2012</b><br>n = 4 | <b>Howell, 2014</b><br>n = 1 | <b>Times Cited</b> |    |
| <b>Health-related Quality of Life</b> |                              |                                 |                             |                              |                    |    |
| Arnedt, 2007                          | +                            | --                              | --                          | --                           | --                 | 1  |
| Byles, 2003                           | --                           | --                              | +                           | --                           | --                 | 1  |
| Dirksen and                           | --                           | +                               | --                          | +                            | +                  | 2  |

|                                        |                                                 |    |                                 |    |                    |
|----------------------------------------|-------------------------------------------------|----|---------------------------------|----|--------------------|
| Epstein, 2008                          |                                                 |    |                                 |    |                    |
| Dixon, 2006                            | --                                              | -- | +                               | -- | 1                  |
| Espie, 2008                            | --                                              | -- | +                               | -- | 1                  |
| Quesnel, 2003                          | --                                              | +  | --                              | -- | 1                  |
| Van Houdenhove, 2011                   | --                                              | -- | +                               | -- | 1                  |
| <b>CBT compared to active controls</b> |                                                 |    |                                 |    |                    |
| Primary Studies n = 2                  | <b>van Straten, 2009*</b><br>n = 3 <sup>2</sup> |    | <b>Seyffert, 2016*</b><br>n = 2 |    | <b>Times Cited</b> |
| <b>Total Sleep Time</b>                |                                                 |    |                                 |    |                    |
| Holmqvist, 2014                        | --                                              |    | +                               |    | 1                  |
| Blom, 2015                             | --                                              |    | +                               |    | 1                  |
| Primary Studies n = 4                  | <b>van Straten, 2009*</b><br>n = 3 <sup>2</sup> |    | <b>Seyffert, 2016*</b><br>n = 2 |    | <b>Times Cited</b> |
| <b>Sleep Efficiency</b>                |                                                 |    |                                 |    |                    |
| Holmqvist, 2014                        | --                                              |    | +                               |    | 1                  |
| Blom, 2015                             | --                                              |    | +                               |    | 1                  |
| Edinger, 2001                          | --                                              |    | --                              |    | --                 |
| Morin, 1999                            | --                                              |    | --                              |    | --                 |

<sup>1</sup>This study involves two trials: in-person CBT-I vs. control and video-based CBT-I vs. control

<sup>2</sup>Unable to determine some or all of the primary studies associated with this outcome

<sup>3</sup>The authors of the Ballesio, 2017 review did not clearly report which studies were included in the analyses. The listed studies are all of the primary studies related to fatigue, but are not included in the times cited count.

\*systematic review with meta-analysis

**Table F9. Primary studies across systematic reviews that compared behavioural interventions to inactive controls**

| Primary Studies | Brasure, 2015*<br>n = 5 | Buscemi, 2005*<br>n = 13 | Hwang, 2016*<br>n = 5 | Bogdanov, 2017<br>n = 1 | Brooks, 2014<br>n = 1 | Hellström, 2011<br>n = 1 | McCurry, 2007<br>n = 1 | Miller, 2014<br>n = 4 | Tamrat, 2013<br>n = 3 | Wang, 2005<br>n = 1 | Times Cited | Outcome(s) |
|-----------------|-------------------------|--------------------------|-----------------------|-------------------------|-----------------------|--------------------------|------------------------|-----------------------|-----------------------|---------------------|-------------|------------|
| Alessi, 2005    | --                      | --                       | +                     | --                      | --                    | --                       | --                     | --                    | --                    | --                  | 1           | SQ         |
| Bliwise, 1995   | --                      | --                       | --                    | --                      | --                    | --                       | --                     | +                     | --                    | --                  | 1           | SOL, TST   |

| Primary Studies          | Brasure, 2015*<br>n = 5 | Buscemi, 2005*<br>n = 13 | Hwang, 2016*<br>n = 5 | Bogdanov, 2017<br>n = 1 | Brooks, 2014<br>n = 1 | Hellström, 2011<br>n = 1 | McCurry, 2007<br>n = 1 | Miller, 2014<br>n = 4 | Tamrat, 2013<br>n = 3 | Wang, 2005<br>n = 1 | Times Cited | Outcome(s)             |
|--------------------------|-------------------------|--------------------------|-----------------------|-------------------------|-----------------------|--------------------------|------------------------|-----------------------|-----------------------|---------------------|-------------|------------------------|
| Buyse, 2011              | +                       | -                        | +                     | -                       | -                     | -                        | -                      | -                     | -                     | -                   | 2           | SOL, WASO, SQ          |
| Carr-Kaffashan, 1979     | -                       | +                        | -                     | -                       | -                     | -                        | -                      | -                     | -                     | -                   | 1           | SOL                    |
| Choliz, 1995             | -                       | +                        | -                     | -                       | -                     | -                        | -                      | -                     | -                     | -                   | 1           | SOL                    |
| Edinger, 2001            | +                       | -                        | -                     | -                       | -                     | -                        | -                      | -                     | -                     | -                   | 1           | TST, WASO              |
| Epstein, 2012            | +                       | -                        | -                     | -                       | -                     | -                        | -                      | +                     | -                     | -                   | 2           | SOL, TST, WASO, SQ, SE |
| Espie, 1989              | -                       | +                        | -                     | -                       | -                     | -                        | -                      | -                     | -                     | -                   | 1           | SOL, TST               |
| Friedman, 2000           | -                       | -                        | -                     | -                       | -                     | -                        | +                      | +                     | -                     | -                   | 2           | SOL, TST, WASO, SE     |
| Germain, 2006            | -                       | -                        | +                     | -                       | -                     | -                        | -                      | -                     | -                     | -                   | 1           | SQ                     |
| Greef and Conradie, 1998 | -                       | -                        | -                     | -                       | +                     | -                        | -                      | -                     | -                     | -                   | 1           | SQ                     |
| Haynes, 1974             | -                       | +                        | -                     | -                       | -                     | -                        | -                      | -                     | -                     | -                   | 1           | SOL                    |
| Haynes, 1977             | -                       | +                        | -                     | -                       | -                     | -                        | -                      | -                     | -                     | -                   | 1           | SOL                    |
| Haynes, 1977             | -                       | +                        | -                     | -                       | -                     | -                        | -                      | -                     | -                     | -                   | 1           | SOL                    |
| Hong and Kim, 2009       | -                       | -                        | +                     | -                       | -                     | -                        | -                      | -                     | -                     | -                   | 1           | SQ                     |
| Hughes, 1978             | -                       | +                        | -                     | -                       | -                     | -                        | -                      | -                     | -                     | -                   | 1           | SOL                    |
| Jacobs, 1993             | -                       | -                        | -                     | -                       | -                     | -                        | -                      | -                     | -                     | +                   | 1           | SOL                    |
| Lacks, 1983              | -                       | +                        | -                     | -                       | -                     | -                        | -                      | -                     | -                     | -                   | 1           | SOL                    |
| Lareau, 2008             | -                       | -                        | -                     | -                       | -                     | -                        | -                      | -                     | +                     | -                   | 1           | SQ                     |
| Lichstein, 2001          | +                       | +                        | -                     | -                       | -                     | -                        | -                      | -                     | -                     | -                   | 2           | SOL, TST, WASO, SE     |
| McCrae, 2007             | +                       | -                        | -                     | -                       | -                     | -                        | -                      | -                     | -                     | -                   | 1           | SOL, WASO              |
| McCurry, 2013            | -                       | -                        | +                     | -                       | -                     | -                        | -                      | -                     | -                     | -                   | 1           | SQ                     |
| McDowell, 1998           | -                       | -                        | -                     | -                       | -                     | -                        | -                      | -                     | +                     | -                   | 1           | SQ                     |
| Mitchell, 1979           | -                       | +                        | -                     | -                       | -                     | -                        | -                      | -                     | -                     | -                   | 1           | SOL                    |
| Nicassio, 1974           | -                       | +                        | -                     | -                       | -                     | -                        | -                      | -                     | -                     | -                   | 1           | SOL                    |
| Richardson, 2003         | -                       | -                        | -                     | -                       | -                     | +                        | -                      | -                     | -                     | -                   | 1           | SQ                     |
| Sanavio, 1990            | -                       | +                        | -                     | -                       | -                     | -                        | -                      | -                     | -                     | -                   | 1           | SOL, WASO              |

| Primary Studies | Brasure, 2015*<br>n = 5 | Buscemi, 2005*<br>n = 13 | Hwang, 2016*<br>n = 5 | Bogdanov, 2017<br>n = 1 | Brooks, 2014<br>n = 1 | Hellström, 2011<br>n = 1 | McCurry, 2007<br>n = 1 | Miller, 2014<br>n = 4 | Tamrat, 2013<br>n = 3 | Wang, 2005<br>n = 1 | Times Cited | Outcome(s)         |
|-----------------|-------------------------|--------------------------|-----------------------|-------------------------|-----------------------|--------------------------|------------------------|-----------------------|-----------------------|---------------------|-------------|--------------------|
| Shealy, 1979    | --                      | +                        | --                    | --                      | --                    | --                       | --                     | --                    | --                    | --                  | 1           | SOL                |
| Soeffing, 2008  | +                       | --                       | --                    | --                      | --                    | --                       | --                     | --                    | --                    | --                  | 1           | SOL, WASO          |
| Stanton, 1989   | --                      | +                        | --                    | --                      | --                    | --                       | --                     | --                    | --                    | --                  | 1           | SOL                |
| Taylor, 2010    | --                      | --                       | --                    | --                      | --                    | --                       | --                     | +                     | --                    | --                  | 1           | SOL, TST, WASO, SE |
| Toth, 2007      | --                      | --                       | --                    | --                      | --                    | --                       | --                     | --                    | +                     | --                  | 1           | SQ                 |
| Vuletic, 2016   | --                      | --                       | --                    | +                       | --                    | --                       | --                     | --                    | --                    | --                  | 1           | SQ                 |

\*systematic reviews with meta-analysis

**Table F10. Primary studies across included systematic reviews that examined mindfulness based interventions**

| Primary Studies | Gong, 2016*<br>n = 2 | Venables, 2014<br>n = 3 | Times Cited | Outcome(s)       |
|-----------------|----------------------|-------------------------|-------------|------------------|
| Black, 2015     | +                    | --                      | 1           | SQ               |
| Britton, 2012   | +                    | --                      | 1           | SOL, TST, SQ, SE |
| Carlson, 2005   | --                   | +                       | 1           | SQ, SE           |
| Lengacher, 2013 | --                   | +                       | 1           | SE               |
| Ong, 2014       | +                    | --                      | 1           | TST, SE          |
| Shapiro, 2003   | --                   | +                       | 1           | SE               |
| Zhang, 2015     | +                    | --                      | 1           | SOL, SQ          |

\*systematic review with meta-analysis

**Table F11. Primary studies across included systematic reviews that compared combination therapy to inactive controls**

| Primary Studies (n=4) | Buscemi, 2005*<br>n = 2 | Chiesa, 2009<br>n = 2 | Times Cited | Outcome(s) |
|-----------------------|-------------------------|-----------------------|-------------|------------|
|-----------------------|-------------------------|-----------------------|-------------|------------|

|                   |    |    |   |          |
|-------------------|----|----|---|----------|
| Milby, 1993       | +  | -- | 1 | TST      |
| Morin, 1999       | +  | -- | 1 | TST      |
| Heidenreich, 2006 | -- | +  | 1 | SOL, TST |
| Ong, 2008         | -- | +  | 1 | TST, SQ  |

\*systematic review with meta-analysis
